# Supplementary material for: How does a social norms-based intervention affect behaviour change? Interim findings from a cluster randomised controlled trial in Odisha, India
Source: PubMed Central journal article supplement (PMC9272109; doi:10.1136/bmjopen-2021-053152), 2022-07-08
Supplement: bmjopen-2021-053152.draft_revisions.pdf [file bmjopen-2021-053152.draft_revisions.pdf]

# BMJ Open

BMJ Open is committed to open peer review. As part of this commitment we make the peer review history of every article we publish publicly available.

When an article is published we post the peer reviewers' comments and the authors' responses online. We also post the versions of the paper that were used during peer review. These are the versions that the peer review comments apply to.

The versions of the paper that follow are the versions that were submitted during the peer review process. They are not the versions of record or the final published versions. They should not be cited or distributed as the published version of this manuscript.

BMJ Open is an open access journal and the full, final, typeset and author-corrected version of record of the manuscript is available on our site with no access controls, subscription charges or pay-per-view fees (<http://bmjopen.bmj.com>).

If you have any questions on BMJ Open's open peer review process please email [info.bmjopen@bmj.com](mailto:info.bmjopen@bmj.com)

# BMJ Open

## Unpacking how a social norms-based intervention affects behavior change: The Reduction in Anemia through Normative Innovations (RANI) Project

|                               |                                                                                                                                                 |
|-------------------------------|-------------------------------------------------------------------------------------------------------------------------------------------------|
| Journal:                      | <i>BMJ Open</i>                                                                                                                                 |
| Manuscript ID                 | bmjopen-2021-053152                                                                                                                             |
| Article Type:                 | Original research                                                                                                                               |
| Date Submitted by the Author: | 06-May-2021                                                                                                                                     |
| Complete List of Authors:     | Sedlander, Erica<br>Pant, Ichhya<br>Bingenheimer, Jeffrey<br>Yilma, Hagere<br>Patro, Lipika<br>Mohanty, Satya<br>Ganjoo, Rohini<br>Rimal, Rajiv |
| Keywords:                     | PUBLIC HEALTH, NUTRITION & DIETETICS, Public health < INFECTIOUS DISEASES                                                                       |
|                               |                                                                                                                                                 |

SCHOLARONE™  
Manuscripts

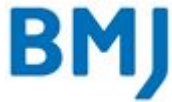

I, the Submitting Author has the right to grant and does grant on behalf of all authors of the Work (as defined in the below author licence), an exclusive licence and/or a non-exclusive licence for contributions from authors who are: i) UK Crown employees; ii) where BMJ has agreed a CC-BY licence shall apply, and/or iii) in accordance with the terms applicable for US Federal Government officers or employees acting as part of their official duties; on a worldwide, perpetual, irrevocable, royalty-free basis to BMJ Publishing Group Ltd ("BMJ") its licensees and where the relevant Journal is co-owned by BMJ to the co-owners of the Journal, to publish the Work in this journal and any other BMJ products and to exploit all rights, as set out in our [licence](#).

The Submitting Author accepts and understands that any supply made under these terms is made by BMJ to the Submitting Author unless you are acting as an employee on behalf of your employer or a postgraduate student of an affiliated institution which is paying any applicable article publishing charge ("APC") for Open Access articles. Where the Submitting Author wishes to make the Work available on an Open Access basis (and intends to pay the relevant APC), the terms of reuse of such Open Access shall be governed by a Creative Commons licence – details of these licences and which [Creative Commons](#) licence will apply to this Work are set out in our licence referred to above.

Other than as permitted in any relevant BMJ Author's Self Archiving Policies, I confirm this Work has not been accepted for publication elsewhere, is not being considered for publication elsewhere and does not duplicate material already published. I confirm all authors consent to publication of this Work and authorise the granting of this licence.

1  
2  
3 Title: Unpacking how a social norms-based intervention affects behavior change: The Reduction  
4 in Anemia through Normative Innovations (RANI) Project  
5  
6  
7

8  
9 Authors: Erica Sedlander, DrPH, MPH<sup>1</sup>, Ichhya Pant, DrPH (c), MPH<sup>1</sup>, Jeffrey Bart  
10 Bingenheimer, PhD,<sup>1</sup> Hagere Yilma, PhD (c), MPH<sup>1</sup>, Lipika Patro,<sup>3</sup> Satya Mohanty, MS,<sup>2</sup> Rohini  
11 Ganjoo, PhD<sup>4</sup>, Rajiv N. Rimal, PhD<sup>1,5</sup>  
12  
13

14  
15  
16 <sup>1</sup>The George Washington University, Milken Institute School of Public Health, Department of  
17 Prevention and Community Health

18 <sup>2</sup>DCOR Consulting

19 <sup>3</sup>IPE Global Limited

20 <sup>4</sup>The George Washington University, School of Medicine and Health Sciences, Department of  
21 Integrated Health Sciences

22 <sup>5</sup> Johns Hopkins University, Department of Health Behavior and Society  
23  
24  
25  
26

27 Erica Sedlander: (corresponding author)

28 The George Washington University, Milken Institute School of Public Health  
29 950 New Hampshire, Department of Prevention and Community Health

30 Washington D.C. 20052

31 esedlander@gwmail.gwu.edu  
32  
33

34 Erica Sedlander: [esedlander@gwmail.gwu.edu](mailto:esedlander@gwmail.gwu.edu)

35 Ichhya Pant: [ipant@email.gwu.edu](mailto:ipant@email.gwu.edu)

36 Jeffrey Bart Bingenheimer: [bartbing@gwu.edu](mailto:bartbing@gwu.edu)

37 Hagere Yilma [hyilma@gwmail.gwu.edu](mailto:hyilma@gwmail.gwu.edu)

38 Lipika Patro: [lpatro@ipeglobal.com](mailto:lpatro@ipeglobal.com)

39 Satya Mohanty: [satya.dcor@gmail.com](mailto:satya.dcor@gmail.com)

40 Rohini Ganjoo: [rganjoo@email.gwu.edu](mailto:rganjoo@email.gwu.edu)

41 Rajiv N. Rimal: [rimal@jhu.edu](mailto:rimal@jhu.edu)  
42  
43  
44  
45  
46  
47  
48  
49  
50  
51  
52  
53  
54  
55  
56  
57  
58  
59  
60

## **Unpacking how a social norms-based intervention affects behavior change: The Reduction in Anemia through Normative Innovations (RANI) Project**

### **Abstract**

Background: Behavior change interventions targeting social norms are burgeoning but researchers have little guidance on what they look like and which components affect behavior change. The Reduction in Anemia through Normative Innovations (RANI) project designed an intervention to increase iron folic acid consumption in Odisha, India.

Purpose: This paper examines which components affect uptake.

Methods: We collected baseline data and midline data six months later from women in the control and treatment arms (n = 3,800). Using nested models, we analyzed data from three different intervention components: monthly community-based testing for anemia, participatory group education sessions, and videos. We also examined whether age, caste, education, and communicating about the intervention moderated the effect of the intervention on iron supplement use.

Results: Residing in treatment villages increased the odds of taking supplements by more than 16 times. Being exposed to each of the intervention components separately and as reported here, all together, also increased use. Getting tested for anemia increased the odds by 38%, followed by watching videos, which increased the odds by 26%. Participating in group education sessions only increased the odds by 9%. There was no significant difference in how the intervention affected iron supplement use by age, caste, education level, or interpersonal communication about each of the intervention components.

1  
2  
3 Conclusions: All intervention components increased iron supplement use to differing degrees of  
4 magnitude. It appears that a social norms-based approach can result in improving iron folic acid  
5 uptake, though improvements in hemoglobin counts were not yet discernible.  
6  
7  
8  
9

10  
11 Keywords: social norms, behavior change, intervention, anemia  
12  
13

14  
15 Strengths and limitations of this study  
16

- 17 • The intervention is based on formative research, theory, and co-designed with input from  
18 community stakeholders
- 19 • Data come from a large double blinded cluster-randomized controlled trial
- 20 • Intervention components are qualitatively described and then quantitatively evaluated to  
21 decipher their individual effect on iron supplement use
- 22 • We rely on self-report for iron supplement use and image recall for participation in  
23 intervention activities  
24  
25  
26

## 27 28 **Introduction**

29  
30 Social norms, defined as informal rules of behavior considered acceptable in a group or  
31 society [1], are increasingly recognized as drivers of or barriers to behavior change. In a review  
32 of social norms-based interventions over the last three decades, more than half were published in  
33 the last decade [2]. Recent social norms interventions in low to middle income countries have  
34 focused on changing harmful behaviors, such as intimate partner violence [3-4], female genital  
35 cutting [5], and child marriage [6]. Past research shows that people are more likely to engage in a  
36 behavior when they believe many others also do so, and when there is a social expectation that  
37 they themselves should comply. In the anemia prevention context recent literature indicates a  
38 seemingly simple behavior, e.g., taking a weekly iron supplement, is embedded in social and  
39 cultural dynamics that dictate which health behaviors are appropriate [7-8].  
40  
41  
42  
43  
44  
45  
46  
47  
48  
49  
50  
51

52  
53 The theory of normative social behavior (TNSB) highlights the critical role that social  
54 norms can play in influencing health behaviors and the circumstances under which they may do  
55  
56  
57  
58  
59  
60

1  
2  
3 so [9-10]. According to the TNSB, the effects on behavior of descriptive norms (i.e., one's  
4 perceptions about others' behaviors) and injunctive norms (i.e., one's perceptions of social  
5 expectations regarding the behavior) may depend upon other factors at the individual, behavioral,  
6 and environmental level [11]. Factors that could either augment or attenuate the effect of social  
7 norms messaging on iron folic acid (IFA) use include perceptions that one is at risk of getting  
8 anemia, outcome expectations that taking IFA will result in health benefits like preventing  
9 anemia or reducing fatigue, and access and availability of IFA. Therefore, interventions must aim  
10 to improve both social norms around a behavior along with potential moderators that may  
11 strengthen the relationship between social norms and behaviors. In a 2018 meta-analysis of  
12 social norms approaches to behavior change, Dempsey and authors found that the most effective  
13 social norms manipulations take place in one's own environment (e.g., a field trial), those that  
14 deliver messages in multiple formats, and those that target collectivist groups [12].

15  
16  
17  
18  
19  
20  
21  
22  
23  
24  
25  
26  
27  
28  
29  
30  
31 Many social norms-based interventions are often complex and resource intensive. To  
32 implement them well, program planners need to understand the social context, the social norms  
33 around the behavior of interest, and barriers and facilitators at multiple levels of the socio-  
34 ecological model [13,14]. Guided by the TNSB, the Reduction in Anemia through Normative  
35 Innovations (RANI) Project conducted formative research to delineate significant facilitators to  
36 and barriers of iron folic acid consumption in Odisha, India [8]. Findings from that work led to  
37 the design of the intervention, which included three components: (a) hands-on participatory  
38 learning modules conducted in small groups, (b) dissemination of short videos focusing on iron  
39 consumption norms, and (c) monthly hemoglobin testing for anemia, followed by public display  
40 of (anonymized) community results.  
41  
42  
43  
44  
45  
46  
47  
48  
49  
50  
51  
52  
53  
54  
55  
56  
57  
58  
59  
60

1  
2  
3 In this paper, we seek to determine which intervention components impact iron folic acid  
4 consumption at midline. This knowledge allows us to adapt the intervention implementation  
5 according to empirical findings. Because social and political realities on the ground cannot be  
6 fully predicted at the outset of any given field trial [15], we deemed this approach more  
7 preferable than simply implementing a static intervention based on *a priori* data. Thus, the  
8 primary goal of this paper is to examine the extent to which each intervention component  
9 contributed to the overall effects of the intervention. In addition, because the influence of the  
10 intervention may be different across subgroups, we also examine how susceptibility to  
11 intervention impact varied by age, caste, education, and communication activity. We hope that  
12 delineating the effects of each intervention component will provide guidance for future social  
13 norms-based intervention designs. As Davis et al. ([69], p. 2218) argue, “while the social norms  
14 approach is based in a rich theory, the theory does little to illuminate implementation details of  
15 interventions [16].”

## 32 **Methods**

33  
34  
35 This study was approved by the George Washington University Institutional Review  
36 Board (FWA00005945), Sigma Science and Research, an independent IRB located in New  
37 Delhi, India, and the Indian Council for Medical Research’s Health Ministry’s Screening  
38 Committee.  
39  
40  
41  
42  
43  
44  
45  
46

### 47 *Patient and Public Involvement Statement*

48  
49 Key stakeholders from the community where the intervention was implemented  
50 participated in a two-day convening in Bhubaneswar, Odisha to co-design the intervention.  
51  
52  
53  
54 Community health workers helped to implement the intervention and disseminate findings back  
55  
56  
57  
58  
59  
60



1  
2  
3 to the community. Patients were not involved in the study – participants were living in the  
4  
5 villages where the intervention took place.  
6  
7  
8  
9

## 10 **Study Setting**

11  
12 Nestled in the eastern coast of India, the state of Odisha is predominantly rural. Most  
13  
14 residents (95%) are Hindu, with 23% belonging to specific tribes and practicing tribal culture  
15  
16 (NFHS 2015-2016). At approximately 2.1 children per woman, the total fertility rate sits fairly  
17  
18 low. Our focal district, Angul, one of 30 in the state of Odisha, has almost 2,000 villages with a  
19  
20 total population of just over 1.2 million (Government of Odisha, 2019). Men's literacy rate  
21  
22 (87%) is higher than that of women's (70%). Almost a quarter of girls (22%) marry before age  
23  
24 18 and around half of married women of reproductive age use modern methods of family  
25  
26 planning [17].  
27  
28  
29  
30  
31  
32

## 33 *Intervention Development*

34  
35 To develop the RANI intervention, we conducted formative research that examined social  
36  
37 norms around IFA use. Between March and May 2018, we collected data from four villages in  
38  
39 the two adjacent blocks (administrative units below the district) where the intervention took  
40  
41 place (Kishorenagar and Athamalik). We conducted 16 focus groups and 21 individual  
42  
43 interviews (n = 148), stratified by age and gender, with women of reproductive age, husbands,  
44  
45 mothers-in-law, and key informants. To explore women's social norms within the focus groups,  
46  
47 we used [18]. Vignettes can also help uncover if social sanctions exist and unpack existing social  
48  
49 norms. Four researchers, two from India and two from the United States, analyzed transcripts  
50  
51 using NVivo v.12 to identify barriers and facilitators to IFA use.  
52  
53  
54  
55  
56  
57  
58  
59  
60

1  
2  
3 We found that social norms and available services varied substantially for pregnant women,  
4 non-pregnant women, and adolescents. Specifically, we found that most participants believed  
5 only pregnant women and adolescents in school consume IFA (descriptive norms). Participants  
6 also stated that only pregnant women and those diagnosed with anemia should be taking IFA  
7 regularly (injunctive norms). Furthermore, we found that frontline health workers only  
8 distributed IFA to pregnant women. Adolescents enrolled in school can also obtain them weekly  
9 [8].  
10  
11  
12  
13  
14  
15  
16  
17  
18

19 Non-pregnant women (our sample for this paper) were not receiving IFA from frontline  
20 health workers. Indeed, barriers faced by non-pregnant women were significant: they needed to  
21 visit a health center, get tested for anemia, and then obtain the IFA if they were diagnosed as  
22 anemic. We also found that risk perception was low, with most participants believing that only  
23 “a handful of women” in their community had anemia when, in reality, more than half of women  
24 are anemic. When anemia was referenced, we found that participants were primarily referring to  
25 severe anemia, not its mild or moderate forms [8].  
26  
27  
28  
29  
30  
31  
32  
33  
34

35 Our findings also revealed that inequitable gender norms were an upstream barrier to  
36 women’s accessing and adhering to IFA supplements. Specifically, women prioritized their  
37 family’s health and well-being over their own, normalized fatigue as part of a woman’s plight,  
38 and given that they often do all of the household works and also work outside of the home, they  
39 lacked time (and often autonomy) to visit a health center on their own [19-20].  
40  
41  
42  
43  
44  
45  
46

47 We used findings from the qualitative research, past literature on anemia reduction  
48 efforts, and the TNSB to design the RANI intervention. We also held a three-day convening in  
49 Bhubaneswar, Odisha, where we invited frontline health workers from the community, anemia  
50 researchers, and program planners to co-design an effective social norms-based intervention. The  
51  
52  
53  
54  
55  
56  
57  
58  
59  
60

1  
2  
3 RANI Project intervention comprises three main components, each tapping into social norms  
4 differently: participatory learning modules; RANI Comms (videos), and community hemoglobin  
5 testing. A description of all RANI activities can be found in **Table 1**.  
6  
7  
8  
9

## 10 **Study Design**

11  
12 Data for this study come from the RANI Project [21]. The RANI project uses a cluster  
13 randomized controlled trial to evaluate the efficacy of a norms-based intervention to increase  
14 IFA use and reduce anemia in Odisha, India. The RANI project selected two blocks within the  
15 Angul district in the state of Odisha. We grouped contiguous villages in these blocks into  
16 clusters, which we then randomly assigned to either the treatment or control arm. Villages in the  
17 treatment arm were exposed to the RANI intervention, while villages in the control arm  
18 continued with “care-as-usual”. We created clusters to minimize contamination; clusters were  
19 separated by either a natural buffer (i.e., mountain or river) or a village that was neither in the  
20 treatment nor in the control arm. This process resulted in a total of 89 clusters from 239 villages.  
21 We then segmented clusters by the proportion of caste/ethnic groups (in India they are called  
22 scheduled castes and scheduled tribes) and then selected 3 per stratum, for a total of 15 clusters  
23 per arm to be included in data analysis (which comprised 81 villages).  
24  
25  
26  
27  
28  
29  
30  
31  
32  
33  
34  
35  
36  
37  
38  
39

40 In this paper, we report results from the baseline and midterm assessment, which is a  
41 longitudinal study from both the treatment and control clusters. The response rate for the midline  
42 questionnaire was 96.2%. Interviewers visited homes up to three times and the primary reason  
43 for not taking the midline survey was not being home when the interviewers visited their house.  
44  
45  
46  
47  
48

## 49 **Participants**

50  
51 In each designated village, we first enumerated all households and then randomly  
52 selected households for data collection using proportion-to-size principles based on cluster  
53  
54  
55  
56  
57  
58  
59  
60

1  
2  
3 population. From the selected home, one woman of reproductive age (between 15 and 49 years  
4 old) was chosen (randomly if more than one woman was eligible in the same home). Although  
5 our sample consisted of 3,953 participants, this paper restricts the sample to those who were not  
6 pregnant at the time of the midline survey ( $n = 3,800$ ). We do so because the primary dependent  
7 variable, taking iron and folic acid tablets, has been heavily promoted among pregnant women  
8 by the Government of India. Pregnant women are also enrolled in the health system, where  
9 physicians or community health workers provide free IFA. This is not the case among non-  
10 pregnant women, who have not been targeted as IFA recipients on the ground despite WHO and  
11 Indian government recommendations [22-23]. The demographic profile of participants included  
12 in our analysis is shown in Table 2.  
13  
14  
15  
16  
17  
18  
19  
20  
21  
22  
23  
24  
25

### 26 **Procedure**

27  
28 Local data collectors obtained informed consent from all individual participants included in the  
29 study in the local language, Odiya. Participants under the age of 18 were required to obtain the  
30 written permission of one parent or legal guardian. Data collectors orally administered a one-on-  
31 one survey to all participants, which assessed demographic information, psychosocial factors,  
32 and anemia-related behaviors.  
33  
34  
35  
36  
37  
38  
39  
40

### 41 **Inclusion Criteria**

42  
43 Women were eligible for inclusion in the study if they were between the ages of 15 and  
44 49, spoke Odiya, lived in the data collection villages (either treatment or control), and did not  
45 plan to move in the next year (as this is a longitudinal study).  
46  
47  
48  
49

### 50 **Measures**

51  
52 **Dependent Variables.** Our study has two dependent variables: self-reported IFA use and  
53 objectively measured serum hemoglobin levels. We measured *IFA use at midline* using the  
54  
55  
56  
57  
58  
59  
60

1  
2  
3 interview question, “Have you ever eaten/taken an iron tablet or syrup.” (The interviewer then  
4 held up the packet of IFA tablets for the interviewee to see). We coded this as a dichotomous  
5 variable, scored 1 if currently taking and 0 if not or did in the past but stopped now. We obtained  
6 *hemoglobin levels* from all participants at midline through point-of-care hemoglobin tests using a  
7 HemoCue photometer (in line with India’s National Family Health Survey methodology). This  
8 instrument provides hemoglobin levels immediately and accurately [24].  
9

10  
11  
12 **Independent Variables.** We examined four independent variables. The first is a dichotomous  
13 indicator of *treatment assignment* that takes the value 1 for participants residing in intervention  
14 villages and 0 for those residing in control villages. The other three independent variables are  
15 participants’ self-reports of exposure to different components of the RANI intervention. To  
16 measure exposure to the *participatory learning modules*, we took the sum of responses to six  
17 questions about how often participants had seen materials from these sessions. We used visual  
18 images from the sessions, with higher scores indicating more exposure or more frequent  
19 exposure (not seen = 0, seen once or twice = 1, and seen more than twice = 2). One question  
20 asked whether or not they had participated in any of the games that were also a part of the RANI  
21 participatory group sessions (scored as No=0 and Yest=1). Less than 1% of participants ( $n=28$ )  
22 marked “don’t know” (which was coded as missing). We assessed participants’ *own anemia*  
23 *testing* with the question, “How many times have you been tested for anemia as part of the RANI  
24 intervention in the last six months?” Response options ranged from 0 (never) to 4 (more than 3  
25 times). We measured exposure to the *RANI comm videos* as the sum of responses to four  
26 questions about which of the four videos they had watched. Interviewers shared an image from  
27 each video and a brief description of the story plot. Responses were treated as dichotomous for  
28 each video (No = 0, Yes = 1) and summed across the four videos for a range from 0 to 4. We  
29  
30  
31  
32  
33  
34  
35  
36  
37  
38  
39  
40  
41  
42  
43  
44  
45  
46  
47  
48  
49  
50  
51  
52  
53  
54  
55  
56  
57  
58  
59  
60

1  
2  
3 assessed *communicating with others about intervention components* with three separate  
4  
5 questions: “Talked about blood tests when talking about RANI to friends or family;” “Talked  
6  
7 about videos when talking about RANI to friends or family;” and “Talked about RANI meetings  
8  
9 (group education modules) when talking about RANI to friends or family.” For each, an  
10  
11 affirmative response was coded 1 and a negative response was coded 0.  
12  
13

14 **Control Variables.** We asked respondents their *age*, highest completed level of *education*, and  
15  
16 whether they belonged to a *scheduled tribe*. *IFA use at baseline* was assessed exactly as  
17  
18 described above for midline. We asked respondents about the *number of children* they had and  
19  
20 whether or not they were *breastfeeding*. Additionally, to understand if participants had been  
21  
22 exposed to another intervention that was not affiliated with RANI (to avoid contamination), we  
23  
24 asked participants, “Did you hear anything about nutrition or iron tablets from the Swabhimaan  
25  
26 or any other program?” We coded this as a dichotomous variable (No or don’t know = 0 and Yes  
27  
28 = 1).  
29  
30  
31

### 32 **Statistical Analysis**

33  
34  
35 We conducted our analyses in four steps. First, we calculated frequencies and descriptive  
36  
37 statistics of all key analytic variables by treatment and control arm, and obtained p-values testing  
38  
39 the null hypothesis of no difference between the two arms via independent samples t-tests and  
40  
41 Pearson’s chi-squared tests of independence for continuous and categorical variables,  
42  
43 respectively. Second, we ran linear regressions to examine if exposure to each intervention  
44  
45 component differed by sub groups, including older vs. younger (above 32 years old versus below  
46  
47 32 years old), belonging to a scheduled caste or not, and more or less educated (completed  
48  
49 primary school or not). Third, we ran logistic regression models to examine how each  
50  
51 intervention component individually and additively affected IFA use at midline. We show nested  
52  
53  
54  
55  
56  
57  
58  
59  
60

1  
2  
3 models to demonstrate how each intervention component (including being in the treatment arms  
4 versus control arm) affected IFA use differently. All models included control variables: age,  
5  
6 education, currently breastfeeding, number of children, whether or not they belong to scheduled  
7  
8 caste and tribe, knowing anemia status at baseline, IFA use at baseline, and whether or not the  
9  
10 participant reported exposure to a non-RANI intervention. The first model included being a part  
11  
12 of the RANI intervention (treatment versus control), which we kept in all subsequent models,  
13  
14 after which we added exposure to each individual intervention component (models 2-4), and then  
15  
16 all of the intervention components together (model 5). Finally, we ran logistic regression models  
17  
18 that included interaction terms between communicating about the intervention and age,  
19  
20 education, and caste. We used STATA, version 14 to conduct all analyses. To obtain a robust  
21  
22 variance estimate that adjusts for within-cluster correlation, we used the Huber-White clustered  
23  
24 standard errors command [25].  
25  
26  
27  
28  
29

### 30 **Results**

31  
32  
33 Description of the sample included in our study is shown in Panel A of Table 2. Average  
34  
35 age was 31 years old and between a quarter and a third of participants were a part of the tribal  
36  
37 population. On average, participants completed primary school (6 years of education).  
38  
39 Participants in both treatment and control arms had on average more than one child and fewer  
40  
41 than two. About 20% of women in both arms were currently breastfeeding. The only statistically  
42  
43 significant difference between the treatment and control arms was age. Women in the treatment  
44  
45 arm were 31 years old versus 30 years old in the control arm ( $p < .05$ ). All other demographics  
46  
47 were not statistically different by treatment and control. Panel B of Table 2 shows that exposure  
48  
49 to non-RANI interventions was low in both study arms.  
50  
51  
52  
53  
54  
55  
56  
57  
58  
59  
60

1  
2  
3 Crude estimates of the effects of the RANI intervention at midline are shown in Panel C  
4 of Table 2. Participants from the treatment arm reported more IFA use at midline (31.6%)  
5 compared to the control arm (3%) ( $p = < .001$ ). However, hemoglobin levels were not  
6 statistically different in the two arms (11.7% versus 11.5%) ( $p = .14$ ). Panel D of Table 2 shows  
7 that exposure to each of the intervention components was widespread among participants in the  
8 treatment arm and low among participants in the control arm. Specifically, 88% of participants in  
9 the treatment arm compared to only 13% in the control arm reported that they attended at least  
10 one group educational session ( $p = < .001$ ). Eighty percent of participants in the treatment arm  
11 reported that they had been tested at least once as part of the intervention compared to 0% in the  
12 control arm ( $p = < .001$ ). Similarly, 80% of women in the treatment arm reported that they  
13 watched one or more RANI comm videos, compared to less than 1% in the control arm ( $p =$   
14  $< .001$ ). Lastly, exposure to interventions other than RANI was minimal across both the treatment  
15 and control arms (1.2% and 2.1%, respectively).

16  
17  
18  
19  
20  
21  
22  
23  
24  
25  
26  
27  
28  
29  
30  
31  
32  
33 Table 3 shows that older women attended more educational sessions (2.58 compared to  
34 2.28;  $p = < .001$ ), and had more exposure to educational videos than younger women (1.33  
35 compared to 1.15;  $p = < .001$ ). Hemoglobin testing did not vary by age. Table 3 also shows that  
36 neither educational attainment nor caste or tribal background was associated with exposure to the  
37 intervention.

38  
39  
40  
41  
42  
43  
44  
45 Because there was no crude difference between the treatment and control arms in  
46 hemoglobin level at midline (see Panel C of Table 2), we did not conduct analyses linking  
47 exposure to specific intervention components to hemoglobin levels. However, nested logistic  
48 regression models predicting self-reported IFA use as a function of study arm and exposure to  
49 each of the intervention components are presented in Table 4. As seen in Model 1, after  
50  
51  
52  
53  
54  
55  
56  
57  
58  
59  
60



1  
2  
3 controlling for demographic variables and IFA use at baseline, simply being in the treatment arm  
4 increased a woman's odds of taking IFA by more than 16 times (OR = 16.73;  $p < .001$ ). In  
5  
6 Model 2, we added exposure to the group education sessions and found that each session that a  
7  
8 woman attended increased her odds of taking IFA by 23 percent (OR = 1.23;  $p < .001$ ). Model  
9  
10 3 suggest that undergoing an additional test for anemia is associated with a 75 percent increase in  
11  
12 the odds of taking IFA (OR = 1.75;  $p < .001$ ). Model 4 similarly shows that for each RANI  
13  
14 Comm video that a woman watched (1-4 total), her odds of taking IFA increased by almost 50%  
15  
16 (OR 1.49;  $p < .001$ ). Model 5 with all intervention components included shows that while all  
17  
18 effect sizes drop, each component still had a significant effect on IFA use including: attending  
19  
20 group education sessions (OR 1.09;  $p < .01$ ), getting tested for anemia (OR 1.38;  $p < .001$ ); and  
21  
22 watching RANI comm videos (OR 1.26;  $p < .001$ ). This indicates that each component explains a  
23  
24 unique part of the variance in current use of IFA. Our final logistic regression model is not  
25  
26 shown in Table 3 but included interaction terms between each of the three intervention  
27  
28 components and age, education, and caste. None of the interaction terms were statistically  
29  
30 significant.  
31  
32  
33  
34  
35  
36  
37

### 38 Discussion

39  
40 In this paper we present findings from the midline assessment of a multicomponent  
41  
42 behavioral intervention intended to increase IFA use and decrease anemia among women of  
43  
44 reproductive age in Odisha, India. We find strong evidence that the intervention increased the  
45  
46 prevalence of self-reported IFA use among non-pregnant women, but no evidence of an effect of  
47  
48 the intervention on average hemoglobin levels in that group. Self-reported exposure to all three  
49  
50 intervention components was high among women in the treatment arm, which did not vary  
51  
52 substantially by education or membership in a scheduled caste or tribe. However, exposure to  
53  
54  
55  
56  
57  
58  
59  
60

1  
2  
3 group participatory sessions and videos was higher among older women than among younger  
4  
5 women. Self-reported exposure to all three intervention components was positively associated  
6  
7 with IFA use, and these exposures accounted for most but not all of the overall effect of the  
8  
9 RANI intervention on IFA use among non-pregnant women.  
10  
11

12 Our success in impacting older women could be due to a number of reasons. In the Angul  
13  
14 district, older women hold more power in their households and control over their own life  
15  
16 choices than younger women. In addition, older women have more disposable time in their day-  
17  
18 to-day lives, compared to younger women, to be able to attend our time-intensive sessions. Our  
19  
20 own observations in the villages lead us to believe that daughters-in-law devote more time in  
21  
22 completing household chores, compared to mothers-in-law who, by their higher status in the  
23  
24 family hierarchy, have the autonomy to leave home (to attend RANI sessions, for example).  
25  
26 Additionally, their children may be grown and thus they have more time to attend RANI  
27  
28 intervention activities and to focus on their own health and well-being. Newly married women  
29  
30 often face social restrictions to participate in public meetings.  
31  
32  
33  
34

35 This finding has an important implication for interventions in rural India. One (albeit  
36  
37 untested) strategy is to think of older women as direct audience members for interventions, who  
38  
39 are then trained to convey intervention messages to their younger counterparts at home. Because  
40  
41 they tend to occupy a higher status in the social hierarchy, they may also have higher credibility  
42  
43 and thus be able to “sell” the intervention messages more effectively (than, say, younger women  
44  
45 in the community). Thus, older women can serve as ambassadors of the intervention. To our  
46  
47 knowledge, this has not been an explicit intervention strategy in rural India, but our findings  
48  
49 point to the possibility that it could be an effective one.  
50  
51  
52  
53  
54  
55  
56  
57  
58  
59  
60

1  
2  
3 We also found that neither education nor tribal membership was associated with exposure  
4 to the intervention. Put another way, it appears that the RANI Project's outreach efforts did not  
5 disproportionately favor those with higher privilege in society. Indeed, even though exposure to  
6 the intervention did not differ by tribal status or education, in our multivariate models we found  
7 some evidence that those with lesser education had higher IFA uptake. We view this finding  
8 rather optimistically, given that interventions have the potential for exacerbating existing  
9 differences in society along access and socioeconomic lines [26], as has been documented by the  
10 literature on the knowledge gap hypothesis [27-28].  
11  
12  
13  
14  
15  
16  
17  
18  
19  
20

21 We saw strong evidence that testing women for anemia (through finger-prick hemoglobin  
22 counts) was associated with IFA uptake: those who got tested more often were more likely to  
23 consume IFA tablets. The reasons for this are not known precisely, but we do have a few  
24 explanations. First, it could be that testing revealed to women the low hemoglobin counts, which  
25 spurred them to act to improve their scores. Our formative assessment had revealed that feeling  
26 weak was often a part of women's self-identity, that women often believed that fatigue was par  
27 for the course [19 ] and that this was part of the gendered norms for women [20]. We suspect that,  
28 in contrast, an objective measure of iron in the blood, observed through hemoglobin testing,  
29 quantified and thus provided precision to a phenomenon women had come to accept as a vague  
30 notion of fatigue. We found that testing was highly demanded and motivational. Indeed, our  
31 process evaluation data indicate that, despite a high (60%) coverage rate of anemia testing for  
32 women in our intervention catchment areas, we have been unable to meet demand for testing and  
33 repeat testing.  
34  
35  
36  
37  
38  
39  
40  
41  
42  
43  
44  
45  
46  
47  
48  
49  
50

51 A second reason why testing may have motivated women to consume IFA tablets  
52 pertains to observational learning around social norms. Because test results were displayed  
53  
54  
55  
56  
57  
58  
59  
60

1  
2  
3 publicly in the community, and most educational sessions linked the test results with IFA  
4  
5 consumption, women likely came to link their consumption behaviors with hemoglobin readings  
6  
7 – not only for themselves but also for what they had observed among others in their community,  
8  
9 where hemoglobin testing was a monthly event. These events were so popular that, in some  
10  
11 villages, the waiting list for testing ran up to 90 names (we were unable to accommodate more  
12  
13 than 15 women per village per month, given the study design and resources). This public display  
14  
15 of IFA testing and hemoglobin results also normalized women prioritizing their own health  
16  
17 potentially shifting gender norms that solely focus on pregnant women’s health or the health of  
18  
19 the family. Although these underlying reasons are somewhat speculative, they do point to the  
20  
21 need to study more precisely the link between testing and IFA consumption.  
22  
23  
24  
25

26 We also found that exposure to the communication videos was significantly associated  
27  
28 with increased IFA uptake. Indeed, each additional video exposure was associated with a 26%  
29  
30 higher likelihood of taking IFA tablets. We suspect that the underlying reason for this finding  
31  
32 pertains to another normative component of the intervention. The four videos we developed  
33  
34 targeted different audiences, including adolescents, husbands, mothers-in-law, and women of  
35  
36 reproductive age. As an explicit campaign strategy, each video was shown to each of the parties,  
37  
38 including those who were not the explicit target audience for the particular video. This was done  
39  
40 so that each group came to understand that the other groups were also being targeted by the  
41  
42 intervention. So, for example, adolescent girls saw that there were videos that also addressed  
43  
44 men and older women. Similarly, men saw that the videos targeted other men and other women.  
45  
46 The overall strategy was to communicate the message that the entire community was engaged in  
47  
48 the task of reducing anemia.  
49  
50  
51  
52  
53  
54  
55  
56  
57  
58  
59  
60

1  
2  
3 Finally, we should note that attending each educational session, though statistically  
4 significant, only increased the likelihood of IFA consumption by nine percent. Although this  
5 magnitude seems small, we still consider it as important. These sessions were designed primarily  
6 to raise awareness and improve knowledge about anemia, iron-rich foods, and diet diversity. We  
7 also included discussions about gender roles, how eating order in the home disfavors women's  
8 health, and the need to remain strong to be able to take care of others. We have few reasons to  
9 believe that knowledge in these domains would directly translate into behaviors. However, a  
10 significant body of work demonstrates that knowledge about health is a necessary, though not  
11 sufficient, condition for behavior change [29 - 30] and that people often hold knowledge in  
12 abeyance, to be acted upon at the appropriate time [31]. From this perspective, it seems that  
13 educational sessions may have played an important role, even if their impact on behavior change  
14 was small.

15  
16  
17 Of course, our study is not without limitations. First and foremost is the apparent lack of  
18 an effect of the RANI intervention on hemoglobin use, combined with the self-reported nature of  
19 our assessment of IFA use. One plausible explanation of these disparate findings is that the  
20 increase in IFA use among members of the treatment arm is real, but is not sufficient in  
21 magnitude or duration to produce a corresponding increase in hemoglobin levels. Alternatively,  
22 it could be attributable to differential misreporting of IFA use among treatment group members,  
23 a form of courtesy or social desirability bias. Findings from the end line data collection, planned  
24 to take place at the end of the project, may help to adjudicate between these two explanations. A  
25 related limitation is that, while treatment assignment is objectively measured on the basis of  
26 project administrative data, exposure to the three intervention components is self-reported and  
27 may be subject to some level of misreporting. Additionally, although our study used a

1  
2  
3 representative sample of areas and women in our focal areas, findings may not be generalizable  
4  
5 outside of that setting.  
6

7  
8 In spite of these limitations, our study has strengths: the intervention is based on  
9  
10 formative research; it is co-designed by stakeholders from the area; we use a theoretically driven  
11  
12 and adaptive approach; and the study design itself is robust, with an underlying randomization to  
13  
14 experimental arms.  
15

## 16 17 **Conclusion** 18

19 Our findings show that a social norms-based intervention can be successful in increasing  
20  
21 IFA use. They also demonstrate that unique intervention components separately and altogether  
22  
23 impact this success. All three components appear to contribute something to the overall effect of  
24  
25 the intervention. While all three intervention components tapped into social norms messaging,  
26  
27 hemoglobin testing provided individual health information, village level health information, a  
28  
29 comparison to other villages, and changes in health information over time. This multi-level  
30  
31 component, coupled with the other two components, may help women reach the tipping point to  
32  
33 take and adhere to IFA. While IFA use shows promise, hemoglobin levels may need more time  
34  
35 to show significant changes, especially among non-pregnant women who were not taking IFA  
36  
37 and who only take it weekly. End line results will elucidate more information about the full  
38  
39 RANI intervention effects.  
40  
41  
42  
43  
44  
45  
46  
47  
48  
49  
50  
51  
52  
53  
54  
55  
56  
57  
58  
59  
60

### Trial Registration

This trial was registered with Clinical Trial Registry- India (CTRI) (CTRI/2018/10/016186) on 29 October 2018.

### Funding

This work was supported by a grant from The Bill and Melinda Gates Foundation (OPP1182519) to the George Washington University, Rajiv N. Rimal, principal investigator. The funders had no role in study design, data collection and analysis, decision to publish, or preparation of the manuscript

### Author Contribution Statement

ES: Conceptualization, methodology, analysis, writing – original draft

IP: Conceptualization, methodology, writing – review & editing

JB: Methodology, writing – review & editing

HY: Methodology, data curation, writing – review & editing

LP: Project administration, supervision, writing – review & editing

SM: Project administration, supervision, writing – review & editing

RG: writing – review & editing

RR: Conceptualization, methodology, supervision, funding acquisition, writing – review & editing

### Data sharing statement:

Data used for this study can be found in our online data repository: [GW Scholarspace \(https://scholarspace.library.gwu.edu/\)](https://scholarspace.library.gwu.edu/) and can also be requested from the first author.

### Table 1. Description of RANI intervention activities

|                                                                                                                                                                                                                                                                                                                                                                                                                                                                                                                                                                                                                                     |
|-------------------------------------------------------------------------------------------------------------------------------------------------------------------------------------------------------------------------------------------------------------------------------------------------------------------------------------------------------------------------------------------------------------------------------------------------------------------------------------------------------------------------------------------------------------------------------------------------------------------------------------|
| <p><b>Group participatory learning sessions</b></p> <p>We developed ten one-hour-long group participatory learning modules on various topics related to anemia prevention, including iron folic acid supplementation, diet diversity, and social norms/gender norms that may impact a woman's ability to take iron supplements. These monthly group participatory learning sessions are delivered through in-person activities and games. Women and their social networks (e.g., husbands and mothers-in-law) were all invited to participate so that women and those important to her are being exposed to the same messaging.</p> |
| <p><b>RANI Comm videos</b></p>                                                                                                                                                                                                                                                                                                                                                                                                                                                                                                                                                                                                      |

We created RANI Comm videos in the local language, Odiya, with local residents as actors. These videos highlighted the stories of women overcoming barriers related to IFA consumption and other social norms prevalent in the area. The videos were shown on smartphones and tablets to both individuals and small groups. The videos targeted various audiences (pregnant women, non-pregnant women, husbands, and mothers-in-law) and addressed barriers and facilitators to IFA use that we identified in the formative research followed by group discussion sessions. Descriptive and injunctive norms messages around IFA consumption were included in each storyline. An example of injunctive norms messaging in the storyline is a mother-in-law expressing that her daughter-in-law should be taking care of herself too, not just looking after the family, and should be taking weekly IFA to avoid anemia even if she's not pregnant.

### **Community based hemoglobin testing**

We also conducted monthly anemia testing of the women using a digital Hemocue meter. These instant results are shared at the individual, group, and village levels with the help of blood shaped cards (different colors indicating anemia severity) and infographics appropriate for a low literacy population. Monthly community-based testing was followed by a discussion about trends in anemia and village-level comparisons (based on the hemoglobin readings) with neighboring communities at both the individual and community levels. This provides ipsative feedback (information people receive about their ongoing progress over time), normative feedback (information about the particular individual's achievements relative to those of her social peer), and aspirational feedback (comparisons people make between their current state of affairs and the goals they may have set for themselves).



**Table 2. Description of Participants in Treatment and Control Arms**

|                                                | <b>Treatment<br/>(n= 1,903)</b> | <b>Control<br/>(n = 1,897)</b> | <b>P &gt; t </b> |
|------------------------------------------------|---------------------------------|--------------------------------|------------------|
| A. Demographic Background                      |                                 |                                |                  |
| Age (years)                                    | 31.2                            | 30.5                           | <b>0.02</b>      |
| Part of the tribal population                  | 23.4%                           | 31.2%                          | 0.14             |
| Education (years)                              | 6.09                            | 6.17                           | 0.78             |
| Currently breastfeeding                        | 21.3%                           | 21.8%                          | 0.74             |
| Number of children                             | 1.69                            | 1.69                           | 0.97             |
| B. Exposure to a non-RANI related intervention | 1.2%                            | 2.1%                           | 0.16             |
| C. Dependent Variables                         |                                 |                                |                  |
| IFA use at midline (yes/no)                    | 31.6%                           | 3.0%                           | <b>0.00</b>      |
| Hemoglobin at midline (g/dl)                   | 11.66                           | 11.51                          | 0.14             |
| D. Exposure to Intervention Components         |                                 |                                |                  |
| Attended at least one group education session  | 88%                             | 13%                            | <b>0.00</b>      |
| Hemoglobin testing (tested at least once)      | 80%                             | 0%                             | <b>0.00</b>      |
| Watched at least one RANI Comm video           | 80%                             | 0.2%                           | <b>0.00</b>      |

*Notes:* *T*-tests compare demographic differences between treatment versus control arms. Significant cells are in bold. IFA = iron folic acid. *T*-tests compare IFA use and exposure to different intervention components by treatment and control arms. Significant cells are in bold. The other non-RANI related intervention includes anemia related education as one component that may have had some overlap with our intervention. We included this as a control in our models to ensure that any changes in behavior are a result of our intervention alone.

**Table 3. Exposure to each intervention component by age, education, and caste (treatment arm only)**

|                                 | Average number of group educational sessions attended | Proportion undergoing at least one hemoglobin test | Average number of RANI Comm videos seen |
|---------------------------------|-------------------------------------------------------|----------------------------------------------------|-----------------------------------------|
| <b>Age</b>                      |                                                       |                                                    |                                         |
| Less than 32 years              | 2.28 (SD: 2.92)                                       | 0.63 (SD: 0.97)                                    | 1.15 (SD: 1.61)                         |
| 32 years or more                | 2.58 (SD: 3.16)                                       | 0.63 (SD: 0.91)                                    | 1.33 (SD: 1.69)                         |
| p-value                         | <b>0.00</b>                                           | 0.92                                               | <b>0.00</b>                             |
| <b>Education</b>                |                                                       |                                                    |                                         |
| Up to completed primary         | 2.41 (SD: 3.10)                                       | 0.59 (SD: 0.89)                                    | 1.25 (SD: 1.67)                         |
| Greater than completed primary  | 2.42 (SD: 2.97)                                       | 0.66 (SD: 0.99)                                    | 1.21 (SD: 1.62)                         |
| p-value                         | 0.96                                                  | 0.14                                               | 0.64                                    |
| <b>Scheduled Tribe or Caste</b> |                                                       |                                                    |                                         |
| Yes                             | 2.15 (SD: 3.00)                                       | 0.55 (SD: 0.91)                                    | 1.08 (SD: 1.60)                         |
| No                              | 2.50 (SD: 3.03)                                       | 0.66 (SD: 0.96)                                    | 1.28 (SD: 1.66)                         |
| p-value                         | 0.29                                                  | 0.22                                               | 0.27                                    |

\*SD = Standard deviations

**Table 4. Adjusted Odds Ratios from Logistic Regression Models Predicting Iron Folic Acid (IFA) Use at Midline from both Treatment and Control arms Combined**

|                                 | Model 1  | Model 2 | Model 3 | Model 4 | Model 5 |
|---------------------------------|----------|---------|---------|---------|---------|
| RANI Intervention overall       | 16.73*** | 6.60*** | 7.99*** | 5.91*** | 4.07*** |
| <b>Intervention Components</b>  |          |         |         |         |         |
| Group educational sessions      |          | 1.23*** |         |         | 1.09**  |
| Anemia Testing (Hb)             |          |         | 1.75*** |         | 1.38*** |
| RANI Comm videos                |          |         |         | 1.49*** | 1.26*** |
| <b>Control Variables</b>        |          |         |         |         |         |
| Age                             | 0.99     | 0.99    | 1.00    | 0.99    | 1.00    |
| Education                       | 0.97     | 0.97    | 0.96*   | 0.98    | 0.97*   |
| Breastfeeding                   | 1.36*    | 1.37*   | 1.41**  | 1.41**  | 1.42**  |
| Number of children              | 1.00     | 0.96    | 0.96    | 0.98    | 0.97    |
| Caste/Tribe                     | 1.31     | 1.28    | 1.30    | 1.30    | 1.28*   |
| Knows anemia status at baseline | 1.00     | 1.00    | 1.00    | 1.00    | 1.00    |
| Baseline IFA use                | 2.48***  | 2.86*** | 2.60*** | 2.72*** | 3.03*** |
| Non-RANI intervention exposure  | 1.87     | 1.00    | 1.71    | 1.60    | 1.45    |
| R <sup>2</sup>                  | 0.19     | 0.23    | 0.23    | 0.23    | 0.25    |

Notes: \**p* < .05, \*\**p* < .01, \*\*\**p* < .00

## References

1. Reno, R. R., Cialdini, R. B., & Kallgren, C. A. (1993). The trans situational influence of social norms. *Journal of personality and social psychology*, 64(1), 104.
2. Yemin, P., Fei, M., Lahlou, S., & Levy, S. (2019). Using social norms to change behavior and increase sustainability in the real world: A systematic review of the literature. *Sustainability*, 11(20), 5847.
3. Simone Francis, Prabin Nanicha Shrestha, Binita Shrestha, Gemma Ferguson , Brian Batayeh, Monique Hennink & Cari Jo Clark (2020): The Influence of Organised Diffusion on Social Norms Change: Addressing Intimate Partner Violence in Nepal, *Global Public Health*, DOI: 10.1080/17441692.2020.1845767
4. Clark, C. J., Bergenfeld, I., Batayeh, B., Ferguson, G., Shrestha, B., & Shrestha, P. N. (2019). Intimate partner violence in Nepal: Change starts at home study, what works to prevent violence: A global programme to prevent violence against women and girls evidence brief. South Africa Medical Research Council.
5. Shell-Duncan, B., Wander, K., Hernlund, Y., & Moreau, A. (2011). Dynamics of change in the practice of female genital cutting in Senegambia: testing predictions of social convention theory. *Social science & medicine* (1982), 73(8), 1275–1283. <https://doi.org/10.1016/j.socscimed.2011.07.022>
6. Vaitla, Bapu, Alice Taylor, Julia Van Horn, and Ben Cislighi. 2017. *Social Norms and Girls' Well-Being: Linking Theory and Practice*. Washington, D.C.: Data2X.
7. Nagata, J. M., Gatti, L. R., & Barg, F. K. (2012). Social determinants of iron supplementation among women of reproductive age: a systematic review of qualitative data. *Maternal & child nutrition*, 8(1), 1-18.
8. Anonymous 2020
9. Rimal, R. N., Lapinski, M. K., Cook, R. J., & Real, K. (2005). Moving toward a theory of normative influences: How perceived benefits and similarity moderate the impact of descriptive norms on behaviors. *Journal of health communication*, 10(5), 433-450.
10. Rimal, R. N., & Real, K. (2005). How behaviors are influenced by perceived norms: A test of the theory of normative social behavior. *Communication research*, 32(3), 389-414.
11. Chung, A., and Rimal, R. N. (2016). Social norms: a review. *Rev. Commun. Res.* 4, 1–29. doi: 10.12840/issn.2255-4165.2016.04.01.008
12. Dempsey, R., McAlaney, J., Bewick, B. (2018). A Critical Appraisal of the Social Norms Approach as an Interventional Strategy for Health-Related Behavior and Attitude Change. *Frontiers in Psychology*, 6. <https://doi.org/10.3389/fpsyg.2018.02180>
13. Cislighi, B., Nkwi, P., Mackie, G & Shakya, H. (2020). Why context matters for social norms interventions: The case of child marriage in Cameroon, *Global Public Health*, 15:4, 532-543, DOI: 10.1080/17441692.2019.1704818
14. Edberg, M., & Krieger, L. (2020). Recontextualizing the social norms construct as applied to health promotion.. *SSM-Population Health*, 10 (). <http://dx.doi.org/10.1016/j.ssmph.2020.100560>
15. Vishwanath K., Synowiec C & Agha S. Responsive feedback: Towards a new paradigm to enhance intervention effectiveness. (2019). *Gates Open Research*, 3:781.
16. Davis, C.A.; Heiman, J.R.; Menczer, F. A Role for Network Science in Social Norms Intervention. *Procedia Comput. Sci.* 2015, 51, 2217–2226.

17. International Institute for Population Sciences (IIPS) and ICF. National family health survey (NFHS-4), India, 2015–16: Odisha. Mumbai: IIPS; 2017.
18. Gourlay, A., G. Mshana, I. Birdthistle, G. Bulugu, B. Zaba, and M. Urassa. 2014. “Using vignettes in qualitative research to explore barriers and facilitating factors to the uptake of prevention of mother-to-child transmission services in rural Tanzania: A critical analysis,” *BMC Medical Research Methodology* 14(1): 21.
19. Anonymous 2020
20. Anonymous 2021
21. Anonymous 2020
22. World Health Organization. (2018). Weekly iron and folic acid supplementation as an anaemia-prevention strategy in women and adolescent girls: lessons learnt from implementation of programmes among non-pregnant women of reproductive age. World Health Organization. <https://apps.who.int/iris/handle/10665/274581>. Accessed February 4, 2021.
23. Intensified National Iron Plus Initiative (I-NIPI). (2018). Ministry of Health and Family Welfare, Government of India. Anemia Mukht Bharat. [https://anemiamukhtbharat.info/wp-content/uploads/2019/09/Anemia-Mukht-Bharat-Brochure\\_English.pdf](https://anemiamukhtbharat.info/wp-content/uploads/2019/09/Anemia-Mukht-Bharat-Brochure_English.pdf) Accessed February 22, 2021.
24. Sanchis-Gomar F, Cortell-Ballester J, Pareja-Galeano H, Banfi G, Lippi G. Hemoglobin point-of-care testing: the HemoCue system. *J Lab Automation*. 2012;18(3):198–205.
25. Rogers, W.H. (1993). Regression standard errors in clustered samples. *Stata Tech Bull*; 13 (Reprinted in *Stata Technical Bulletin Reprints*, 3: 88–94): 19-23.
26. Viswanath, K., & Kreuter, M. W. (2007). Health disparities, communication inequalities, and eHealth. *American journal of preventive medicine*, 32(5), S131-S133.
27. Donohue, G. A., Tichenor, P. J., & Olien, C. N. (1975). Mass media and the knowledge gap: A hypothesis reconsidered. *Communication research*, 2(1), 3-23.
28. Viswanath, K., & Finnegan Jr, J. R. (1996). The knowledge gap hypothesis: Twenty-five years later. *Annals of the International Communication Association*, 19(1), 187-228.
29. Girma, E., Gebretsadik, L. A., Kaufman, M. R., Rimal, R. N., Morankar, S. N., & Limaye, R. J. (2014). Stigma against people with HIV/AIDS in rural Ethiopia, 2005 to 2011: signs and predictors of improvement. *AIDS and Behavior*, 18(6), 1046-1053.
30. Rimal, R. N. (2000). Closing the knowledge-behavior gap in health promotion: The mediating role of self-efficacy. *Health communication*, 12(3), 219-237.
31. Rimal, R. N., Flora, J. A., & Schooler, C. (1999). Achieving improvements in overall health orientation: Effects of campaign exposure, information seeking, and health media use. *Communication Research*, 26(3), 322-348.

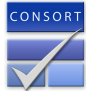

## CONSORT 2010 checklist of information to include when reporting a randomised trial\*

| Section/Topic             | Item No | Checklist item                                                                                                                        | Reported on page No                               |
|---------------------------|---------|---------------------------------------------------------------------------------------------------------------------------------------|---------------------------------------------------|
| <b>Title and abstract</b> |         |                                                                                                                                       |                                                   |
|                           | 1a      | Identification as a randomised trial in the title                                                                                     | 1                                                 |
|                           | 1b      | Structured summary of trial design, methods, results, and conclusions (for specific guidance see CONSORT for abstracts)               | 1-2                                               |
| <b>Introduction</b>       |         |                                                                                                                                       |                                                   |
| Background and objectives | 2a      | Scientific background and explanation of rationale                                                                                    | 2-3                                               |
|                           | 2b      | Specific objectives or hypotheses                                                                                                     | 3-4                                               |
| <b>Methods</b>            |         |                                                                                                                                       |                                                   |
| Trial design              | 3a      | Description of trial design (such as parallel, factorial) including allocation ratio                                                  | 6-7                                               |
|                           | 3b      | Important changes to methods after trial commencement (such as eligibility criteria), with reasons                                    | n/a                                               |
| Participants              | 4a      | Eligibility criteria for participants                                                                                                 | 7-8                                               |
|                           | 4b      | Settings and locations where the data were collected                                                                                  | 4                                                 |
| Interventions             | 5       | The interventions for each group with sufficient details to allow replication, including how and when they were actually administered | reported in protocol paper which is cited in text |
| Outcomes                  | 6a      | Completely defined pre-specified primary and secondary outcome measures, including how and when they were assessed                    | 8-9                                               |
|                           | 6b      | Any changes to trial outcomes after the trial commenced, with reasons                                                                 | n/a                                               |
| Sample size               | 7a      | How sample size was determined                                                                                                        | reported in protocol paper which is cited in text |
|                           | 7b      | When applicable, explanation of any interim analyses and stopping guidelines                                                          | n/a                                               |
| <b>Randomisation:</b>     |         |                                                                                                                                       |                                                   |
| Sequence generation       | 8a      | Method used to generate the random allocation sequence                                                                                | 6-7                                               |
|                           | 8b      | Type of randomisation; details of any restriction (such as blocking and block size)                                                   | 6-7                                               |
| Allocation                | 9       | Mechanism used to implement the random allocation sequence (such as sequentially numbered containers),                                | 6-7                                               |

|    |                                                      |     |                                                                                                                                                   |                                                   |
|----|------------------------------------------------------|-----|---------------------------------------------------------------------------------------------------------------------------------------------------|---------------------------------------------------|
| 1  | concealment                                          |     | describing any steps taken to conceal the sequence until interventions were assigned                                                              |                                                   |
| 2  | mechanism                                            |     |                                                                                                                                                   |                                                   |
| 3  | Implementation                                       | 10  | Who generated the random allocation sequence, who enrolled participants, and who assigned participants to interventions                           | reported in protocol paper which is cited in text |
| 4  |                                                      |     |                                                                                                                                                   |                                                   |
| 5  |                                                      |     |                                                                                                                                                   |                                                   |
| 6  |                                                      |     |                                                                                                                                                   |                                                   |
| 7  |                                                      |     |                                                                                                                                                   |                                                   |
| 8  | Blinding                                             | 11a | If done, who was blinded after assignment to interventions (for example, participants, care providers, those assessing outcomes) and how          | reported in protocol paper which is cited in text |
| 9  |                                                      |     |                                                                                                                                                   |                                                   |
| 10 |                                                      |     |                                                                                                                                                   |                                                   |
| 11 |                                                      |     |                                                                                                                                                   |                                                   |
| 12 |                                                      |     |                                                                                                                                                   |                                                   |
| 13 |                                                      | 11b | If relevant, description of the similarity of interventions                                                                                       | reported in protocol paper which is cited in text |
| 14 |                                                      |     |                                                                                                                                                   |                                                   |
| 15 |                                                      |     |                                                                                                                                                   |                                                   |
| 16 |                                                      |     |                                                                                                                                                   |                                                   |
| 17 |                                                      |     |                                                                                                                                                   |                                                   |
| 18 | Statistical methods                                  | 12a | Statistical methods used to compare groups for primary and secondary outcomes                                                                     | 10-11                                             |
| 19 |                                                      | 12b | Methods for additional analyses, such as subgroup analyses and adjusted analyses                                                                  | 10-11                                             |
| 20 |                                                      |     |                                                                                                                                                   |                                                   |
| 21 | <b>Results</b>                                       |     |                                                                                                                                                   |                                                   |
| 22 | Participant flow (a diagram is strongly recommended) | 13a | For each group, the numbers of participants who were randomly assigned, received intended treatment, and were analysed for the primary outcome    | 26                                                |
| 23 |                                                      | 13b | For each group, losses and exclusions after randomisation, together with reasons                                                                  | 26                                                |
| 24 |                                                      |     |                                                                                                                                                   |                                                   |
| 25 | Recruitment                                          | 14a | Dates defining the periods of recruitment and follow-up                                                                                           | reported in protocol paper which is cited in text |
| 26 |                                                      |     |                                                                                                                                                   |                                                   |
| 27 |                                                      |     |                                                                                                                                                   |                                                   |
| 28 |                                                      |     |                                                                                                                                                   |                                                   |
| 29 |                                                      |     |                                                                                                                                                   |                                                   |
| 30 |                                                      |     |                                                                                                                                                   |                                                   |
| 31 |                                                      | 14b | Why the trial ended or was stopped                                                                                                                | n/a                                               |
| 32 | Baseline data                                        | 15  | A table showing baseline demographic and clinical characteristics for each group                                                                  | 21                                                |
| 33 | Numbers analysed                                     | 16  | For each group, number of participants (denominator) included in each analysis and whether the analysis was by original assigned groups           | 21                                                |
| 34 |                                                      |     |                                                                                                                                                   |                                                   |
| 35 |                                                      |     |                                                                                                                                                   |                                                   |
| 36 | Outcomes and estimation                              | 17a | For each primary and secondary outcome, results for each group, and the estimated effect size and its precision (such as 95% confidence interval) | 11-13; 21-23                                      |
| 37 |                                                      | 17b | For binary outcomes, presentation of both absolute and relative effect sizes is recommended                                                       | 11-13; 21-23                                      |
| 38 |                                                      |     |                                                                                                                                                   |                                                   |
| 39 | Ancillary analyses                                   | 18  | Results of any other analyses performed, including subgroup analyses and adjusted analyses, distinguishing pre-specified from exploratory         | 11-13; 21-23                                      |
| 40 |                                                      |     |                                                                                                                                                   |                                                   |
| 41 |                                                      |     |                                                                                                                                                   |                                                   |
| 42 |                                                      |     |                                                                                                                                                   |                                                   |

|   |                          |    |                                                                                                                  |       |
|---|--------------------------|----|------------------------------------------------------------------------------------------------------------------|-------|
| 1 | Harms                    | 19 | All important harms or unintended effects in each group (for specific guidance see CONSORT for harms)            | n/a   |
| 2 | <b>Discussion</b>        |    |                                                                                                                  |       |
| 3 | Limitations              | 20 | Trial limitations, addressing sources of potential bias, imprecision, and, if relevant, multiplicity of analyses | 17    |
| 4 | Generalisability         | 21 | Generalisability (external validity, applicability) of the trial findings                                        | 14-17 |
| 5 | Interpretation           | 22 | Interpretation consistent with results, balancing benefits and harms, and considering other relevant evidence    | 13-17 |
| 6 | <b>Other information</b> |    |                                                                                                                  |       |
| 7 | Registration             | 23 | Registration number and name of trial registry                                                                   | 2     |
| 8 | Protocol                 | 24 | Where the full trial protocol can be accessed, if available                                                      | 6     |
| 9 | Funding                  | 25 | Sources of funding and other support (such as supply of drugs), role of funders                                  | 2     |

14 \*We strongly recommend reading this statement in conjunction with the CONSORT 2010 Explanation and Elaboration for important clarifications on all the items. If relevant, we also  
 15 recommend reading CONSORT extensions for cluster randomised trials, non-inferiority and equivalence trials, non-pharmacological treatments, herbal interventions, and pragmatic trials.  
 16 Additional extensions are forthcoming: for those and for up to date references relevant to this checklist, see [www.consort-statement.org](http://www.consort-statement.org).



# BMJ Open

## How does a social norms-based intervention affect behavior change? Interim Findings from a cluster randomized controlled trial in Odisha, India

|                                 |                                                                                                                                                                                                                                                                                                                                                                                                                                                                                 |
|---------------------------------|---------------------------------------------------------------------------------------------------------------------------------------------------------------------------------------------------------------------------------------------------------------------------------------------------------------------------------------------------------------------------------------------------------------------------------------------------------------------------------|
| Journal:                        | <i>BMJ Open</i>                                                                                                                                                                                                                                                                                                                                                                                                                                                                 |
| Manuscript ID                   | bmjopen-2021-053152.R1                                                                                                                                                                                                                                                                                                                                                                                                                                                          |
| Article Type:                   | Original research                                                                                                                                                                                                                                                                                                                                                                                                                                                               |
| Date Submitted by the Author:   | 22-Mar-2022                                                                                                                                                                                                                                                                                                                                                                                                                                                                     |
| Complete List of Authors:       | Sedlander, Erica; University of California San Francisco<br>Pant, Ichhya; George Washington University School of Public Health and Health Services<br>Bingenheimer, Jeffrey ; George Washington University Department of Health Policy<br>Yilma, Hagere; Boston University<br>Patro, Lipika; IPE Consulting<br>Mohanty, Satya; DCOR Consulting<br>Ganjoo, Rohini; The George Washington University<br>Rimal , Rajiv; Johns Hopkins University Bloomberg School of Public Health |
| <b>Primary Subject Heading</b>: | Global health                                                                                                                                                                                                                                                                                                                                                                                                                                                                   |
| Secondary Subject Heading:      | Public health, Evidence based practice                                                                                                                                                                                                                                                                                                                                                                                                                                          |
| Keywords:                       | PUBLIC HEALTH, NUTRITION & DIETETICS, Public health < INFECTIOUS DISEASES                                                                                                                                                                                                                                                                                                                                                                                                       |
|                                 |                                                                                                                                                                                                                                                                                                                                                                                                                                                                                 |

SCHOLARONE™  
Manuscripts



I, the Submitting Author has the right to grant and does grant on behalf of all authors of the Work (as defined in the below author licence), an exclusive licence and/or a non-exclusive licence for contributions from authors who are: i) UK Crown employees; ii) where BMJ has agreed a CC-BY licence shall apply, and/or iii) in accordance with the terms applicable for US Federal Government officers or employees acting as part of their official duties; on a worldwide, perpetual, irrevocable, royalty-free basis to BMJ Publishing Group Ltd ("BMJ") its licensees and where the relevant Journal is co-owned by BMJ to the co-owners of the Journal, to publish the Work in this journal and any other BMJ products and to exploit all rights, as set out in our [licence](#).

The Submitting Author accepts and understands that any supply made under these terms is made by BMJ to the Submitting Author unless you are acting as an employee on behalf of your employer or a postgraduate student of an affiliated institution which is paying any applicable article publishing charge ("APC") for Open Access articles. Where the Submitting Author wishes to make the Work available on an Open Access basis (and intends to pay the relevant APC), the terms of reuse of such Open Access shall be governed by a Creative Commons licence – details of these licences and which [Creative Commons](#) licence will apply to this Work are set out in our licence referred to above.

Other than as permitted in any relevant BMJ Author's Self Archiving Policies, I confirm this Work has not been accepted for publication elsewhere, is not being considered for publication elsewhere and does not duplicate material already published. I confirm all authors consent to publication of this Work and authorise the granting of this licence.

1  
2  
3 Title: How does a social norms-based intervention affect behavior change? Interim findings from a cluster randomized controlled trial  
4 in Odisha, India  
5  
6  
7

8  
9 Authors: Erica Sedlander, DrPH, MPH<sup>1</sup>, Ichhya Pant, DrPH (c), MPH<sup>2</sup>, Jeffrey Bart Bingenheimer, PhD,<sup>2</sup> Hagere Yilma, PhD (c),  
10 MPH<sup>3</sup>, Lipika Patro,<sup>4</sup> Satya Mohanty, MS,<sup>5</sup> Rohini Ganjoo, PhD<sup>6</sup>, Rajiv N. Rimal, PhD<sup>2,7</sup>  
11  
12  
13

14  
15 <sup>1</sup> The University of California San Francisco, Department of Social and Behavioral Sciences

16 <sup>2</sup>The George Washington University, Milken Institute School of Public Health, Department of Prevention and Community Health

17 <sup>3</sup>Boston University, Sargent College, Department of Health Sciences

18 <sup>4</sup> IPE Global Limited

19 <sup>5</sup> DCOR Consulting

20 <sup>6</sup> The George Washington University, School of Medicine and Health Sciences, Department of Integrated Health Sciences

21 <sup>7</sup>Johns Hopkins University, Department of Health Behavior and Society  
22  
23  
24  
25

26 Erica Sedlander: (corresponding author)

27 University of California San Francisco, Department of Social and Behavioral Sciences

28 esedlander@gwmail.gwu.edu  
29  
30

31 Erica Sedlander: esedlander@gwmail.gwu.edu

32 Ichhya Pant: [ipant@email.gwu.edu](mailto:ipant@email.gwu.edu)

33 Jeffrey Bart Bingenheimer: [bartbing@gwu.edu](mailto:bartbing@gwu.edu)

34 Hagere Yilma [hyilma@gwmail.gwu.edu](mailto:hyilma@gwmail.gwu.edu)

35 Lipika Patro: [lipika.patro@ipeckd.org](mailto:lipika.patro@ipeckd.org)

36 Satya Mohanty: [satya.dcor@gmail.com](mailto:satya.dcor@gmail.com)

37 Rohini Ganjoo: [rganjoo@email.gwu.edu](mailto:rganjoo@email.gwu.edu)

38 Rajiv N. Rimal: [rimal@jhu.edu](mailto:rimal@jhu.edu)  
39  
40  
41  
42  
43  
44  
45  
46  
47

1  
2  
3  
4  
5  
6  
7  
8  
9  
10  
11  
12  
13  
14  
15 Title: How does a social norms-based intervention affect behavior change? Interim findings from a cluster randomized controlled trial  
16 in Odisha, India  
17  
18  
19

## 20 **Abstract**

21  
22  
23 Background: Behavior change interventions targeting social norms are burgeoning, but researchers have little guidance on what they  
24 look like, and which components affect behavior change. The Reduction in Anemia through Normative Innovations (RANI) project  
25 designed an intervention to increase iron folic acid consumption in Odisha, India.  
26  
27

28  
29  
30 Objective: This paper examines the effect of the intervention at midline to understand which components of the RANI intervention  
31 affect uptake.  
32  
33

34 Methods: Using a cluster randomized controlled design, we collected baseline data and midline data six months later from women of  
35 reproductive age in the control and treatment arms (n = 3,800) in Angul, Odisha, India. Using nested models, we analyzed data from  
36  
37 three different intervention components, monthly community-based testing for anemia, participatory group education sessions, and  
38  
39  
40  
41  
42  
43  
44  
45  
46  
47

1  
2  
3 videos, to determine the extent to which exposure to each of these components accounted for the overall intervention effect on  
4  
5 hemoglobin and self-reported IFA use.  
6

7  
8 Results: Overall, residing in a treatment as opposed to control village had little effect on midline hemoglobin, but increased the odds  
9  
10 of taking supplements by 17 times. Exposure to each of the intervention components had a dose-response relationship with self-  
11  
12 reported IFA use. These components, separately and together, accounted for most of the overall effect of treatment assignment on IFA  
13  
14 use.  
15

16  
17 Conclusions: All intervention components increased iron supplement use to differing degrees of magnitude. It appears that a social  
18  
19 norms-based approach can result in improving iron folic acid uptake, though improvements in hemoglobin counts were not yet  
20  
21 discernible.  
22

23  
24  
25 Keywords: social norms, behavior change, intervention, anemia  
26

27  
28  
29 Strengths and limitations of this study  
30

- 31 • The intervention is based on formative research, theory, and co-designed with input from community stakeholders
  - 32 • Data comes from a large blinded cluster-randomized controlled trial
  - 33 • Intervention components are qualitatively described and then quantitatively evaluated to decipher their individual effect on
  - 34 iron supplement use
  - 35 • We rely on self-report for iron supplement use and image recall for participation in intervention activities
- 36  
37  
38

## 39 **Introduction**

40  
41  
42  
43  
44  
45  
46  
47

1  
2  
3 Social norms, defined as informal rules of behavior considered acceptable in a group or society [1], are increasingly recognized  
4 as drivers of or barriers to behavior change. In a review of social norms-based interventions over the last three decades, more than half  
5 were published in the last decade [2]. Recent social norms interventions in low to middle income countries have focused on changing  
6 harmful behaviors, such as intimate partner violence [3-4], female genital cutting [5], and child marriage [6]. Past research shows that  
7 people are more likely to engage in a behavior when they believe many others also do so, and when there is a social expectation that  
8 they themselves should comply. In the anemia prevention context recent literature indicates a seemingly simple behavior, e.g., taking a  
9 weekly iron supplement, is embedded in social and cultural dynamics that dictate which health behaviors are appropriate [7-8].

10  
11  
12 The theory of normative social behavior (TNSB) highlights the critical role that social norms can play in influencing health  
13 behaviors and the circumstances under which they may do so [9-10]. According to the TNSB, the effects on behavior of descriptive  
14 norms (i.e., one's perceptions about others' behaviors) and injunctive norms (i.e., one's perceptions of social expectations regarding  
15 the behavior) may depend upon other factors at the individual, behavioral, and environmental level [11]. Factors that could either  
16 augment or attenuate the effect of social norms messaging on iron folic acid (IFA) use include perceptions that one is at risk of getting  
17 anemia, outcome expectations that taking IFA will result in health benefits like preventing anemia or reducing fatigue, and access to  
18 and availability of IFA. Therefore, interventions must aim to improve both social norms around a behavior along with potential  
19 moderators that may strengthen the relationship between social norms and behaviors. In a 2018 meta-analysis of social norms  
20 approaches to behavior change, Dempsey and authors found that the most effective social norms manipulations take place in one's  
21 own environment (e.g., a field trial), those that deliver messages in multiple formats, and those that target collectivist groups [12].  
22  
23  
24  
25  
26  
27  
28  
29  
30  
31  
32  
33  
34  
35  
36  
37  
38  
39  
40  
41  
42  
43  
44  
45  
46  
47

1  
2  
3 Many social norms-based interventions are often complex and resource intensive. To implement them well, program planners  
4 need to understand the social context, the social norms around the behavior of interest, and barriers and facilitators at multiple levels  
5 of the socio-ecological model [13,14]. Guided by the TNSB, the Reduction in Anemia through Normative Innovations (RANI) Project  
6 conducted formative research to delineate significant facilitators to and barriers of iron folic acid consumption in Odisha, India [8].  
7 Findings from the formative work led to the design of the intervention, which included three components: (a) hands-on participatory  
8 learning modules conducted in small groups, (b) dissemination of short videos focusing on iron consumption norms, and (c) monthly  
9 hemoglobin testing for anemia, followed by public display of (anonymized) community results.  
10  
11  
12  
13  
14  
15  
16  
17  
18

19 In this paper, we seek to determine which intervention components impact iron folic acid consumption six months later at  
20 midline. This knowledge allowed us to adapt the intervention implementation according to empirical findings. Since social and  
21 political realities on the ground cannot be fully predicted at the outset of any given field trial [15], we deemed this approach more  
22 preferable than simply implementing a static intervention based on *a priori* data. Thus, the primary goal of this paper is to examine the  
23 extent to which each intervention component contributed to the overall effects of the intervention. In addition, because the influence of  
24 the intervention may be different across subgroups, we also examine how susceptibility to intervention impact varied by age, caste,  
25 education, and communication activity. We hope that delineating the effects of each intervention component will provide guidance for  
26 future social norms-based intervention designs. As Davis et al. ([69], p. 2218) argue, “while the social norms approach is based in a  
27 rich theory, the theory does little to illuminate implementation details of interventions [16].”  
28  
29  
30  
31  
32  
33  
34  
35  
36  
37  
38

## 39 **Methods**

40  
41  
42  
43  
44  
45  
46  
47

1  
2  
3  
4 This study was approved by the George Washington University Institutional Review Board (FWA00005945), Sigma Science  
5 and Research, an independent IRB located in New Delhi, India, and the Indian Council for Medical Research's Health Ministry's  
6 Screening Committee.  
7  
8  
9

### 10 11 12 13 *Patient and Public Involvement Statement* 14

15  
16 Key stakeholders from the community where the intervention was implemented participated in a two-day convening in  
17 Bhubaneswar, Odisha to co-design the intervention. Community health workers helped to implement the intervention and disseminate  
18 findings back to the community. Patients were not involved in the study – participants were living in the villages where the  
19 intervention took place.  
20  
21  
22  
23  
24  
25  
26  
27

### 28 **Study Setting** 29

30 Nestled in the eastern coast of India, the state of Odisha is predominantly rural. Most residents (95%) are Hindu, with 23%  
31 belonging to specific tribes and practicing tribal culture (NFHS 2015-2016). At approximately 2.1 children per woman, the total  
32 fertility rate sits fairly low. Our focal district, Angul, one of 30 in the state of Odisha, has almost 2,000 villages with a total population  
33 of just over 1.2 million (Government of Odisha, 2019). Men's literacy rate (87%) is higher than that of women's (70%). Almost a  
34 quarter of girls (22%) marry before age 18 and around half of married women of reproductive age use modern methods of family  
35  
36  
37  
38  
39  
40  
41  
42  
43  
44  
45  
46  
47



1  
2  
3 planning [17].  
4  
5  
6  
7

### 8 *Intervention Development*

9  
10 To develop the RANI intervention, we conducted formative research that examined social norms around IFA use. Between March  
11 and May 2018, we collected data from four villages in the two adjacent blocks (administrative units below the district) where the  
12 intervention took place (Kishorenagar and Athamalik). We conducted 16 focus groups and 21 individual interviews (n = 148),  
13 stratified by age and gender, with women of reproductive age, husbands, mothers-in-law, and key informants. To explore women's  
14 social norms within the focus groups, we used vignettes, short stories about theoretical characters that also live in a rural village in  
15 Angul, India [18]. Vignettes can also help uncover if social sanctions exist and unpack existing social norms. Four researchers, two  
16 from India and two from the United States, analyzed transcripts using NVivo v.12 to identify barriers and facilitators to IFA use.  
17  
18  
19  
20  
21  
22  
23  
24  
25

26 We found that social norms and available services varied substantially for pregnant women, non-pregnant women, and  
27 adolescents. Specifically, we found that most participants believed only pregnant women and adolescents in school consume IFA  
28 (descriptive norms). Participants also stated that only pregnant women and those diagnosed with anemia should be taking IFA  
29 regularly (injunctive norms) and we found that frontline health workers only distributed IFA to pregnant women. Adolescents enrolled  
30 in school can also obtain them weekly [8].  
31  
32  
33  
34  
35  
36  
37

38 Non-pregnant women (our sample for this paper) were not receiving IFA from frontline health workers. Indeed, barriers faced by  
39 non-pregnant women were significant: they needed to visit a health center, get tested for anemia, and then obtain the IFA if they were  
40  
41  
42  
43  
44  
45  
46  
47

1  
2  
3 diagnosed as anemic. We also found that risk perception was low, with most participants believing that only “a handful of women” in  
4  
5 their community had anemia when, in reality, more than half of women are anemic. When anemia was referenced, we found that  
6  
7 participants were primarily referring to severe anemia, not its mild or moderate forms [8].  
8  
9

10 Our findings also revealed that inequitable gender norms were an upstream barrier to women’s accessing and adhering to IFA  
11  
12 supplements. Specifically, women prioritized their family’s health and well-being over their own, normalized fatigue as part of a  
13  
14 woman’s plight, and given that they often do all of the household work while also working outside of the home, they lacked time (and  
15  
16 often autonomy) to visit a health center on their own [19-20].  
17  
18

19 We used findings from the qualitative research, past literature on anemia reduction efforts, and the TNSB to design the RANI  
20  
21 intervention. A three-day convening in Bhubaneswar, Odisha, was held where we invited frontline health workers from the  
22  
23 community, anemia researchers, and program planners to co-design an effective social norms-based intervention. Finally, we used  
24  
25 quantitative data collected at baseline to refine the intervention design. Specifically, we validated qualitative findings that very few  
26  
27 non-pregnant women were taking IFA with a specific percentage (less than 3% of women) despite guidelines that all women should  
28  
29 take them regularly to prevent anemia [21]. Therefore, we decided to focus more on injunctive norms messaging (that all women of  
30  
31 reproductive age should take IFA) rather than descriptive norms messaging (that women are taking IFA) in the beginning of the  
32  
33 intervention.  
34  
35  
36  
37  
38  
39  
40  
41  
42  
43  
44  
45  
46  
47

1  
2  
3 The RANI Project intervention comprises three main components, each tapping into social norms differently: participatory  
4 learning modules; RANI Comms (videos), and community hemoglobin testing. A full description of all RANI intervention activities  
5 including specifics about each component can be found in **Table 1**. All RANI project data is stored in an online data repository [22].  
6  
7  
8  
9

## 10 **Study Design**

11  
12 Data for this study report interim midterm findings from the main trial of the RANI project [23]. The RANI project uses a  
13 cluster randomized controlled trial to evaluate the efficacy of a norms-based intervention to increase IFA use and reduce anemia in  
14 Odisha, India. The RANI project selected two blocks within the Angul district in the state of Odisha. We grouped contiguous villages  
15 in these blocks into clusters, which we then randomly assigned to either the treatment or control arm. Villages in the treatment arm  
16 were exposed to the RANI intervention, while villages in the control arm continued with “care-as-usual”. We created clusters to  
17 minimize contamination; clusters were separated by either a natural buffer (i.e., mountain or river) or a village that was neither in the  
18 treatment nor in the control arm. This process resulted in a total of 89 clusters from 239 villages. We then segmented clusters by the  
19 proportion of caste/ethnic groups (in India they are called scheduled castes and scheduled tribes) and then selected 3 per stratum, for a  
20 total of 15 clusters per arm to be included in data analysis (which comprised 81 villages).  
21  
22  
23  
24  
25  
26  
27  
28  
29  
30  
31  
32

33 In this paper, we report results from the baseline and midterm assessment, which is a longitudinal study from both the  
34 treatment and control clusters. The response rate for the midline questionnaire was 96.2%. Interviewers visited homes up to three  
35 times and the primary reason for not taking the midline survey was not being home when the interviewers visited their house.  
36  
37  
38  
39

## 40 **Participants**

1  
2  
3 In each designated village, we first enumerated all households and then randomly selected households for data collection using  
4 proportion-to-size principles based on cluster population. From the selected home, one woman of reproductive age (between 15 and 49  
5 years old) was chosen (randomly if more than one woman was eligible in the same home). Although our sample consisted of 3,953  
6 participants, this paper restricts the sample to those who were not pregnant at the time of the midline survey ( $n = 3,800$ ). We do so  
7 because the primary dependent variable, taking iron and folic acid tablets, has been heavily promoted among pregnant women by the  
8 Government of India. Pregnant women are also enrolled in the health system, where physicians or community health workers provide  
9 free IFA. This is not the case among non-pregnant women, who have not been targeted as IFA recipients on the ground despite WHO  
10 and Indian government recommendations [24-25]. The demographic profile of participants included in our analysis is shown in Table  
11 2.  
12  
13  
14  
15  
16  
17  
18  
19  
20  
21  
22

### 23 **Procedure**

24 The baseline data was collected in September 2019 and midline data was collected six months later in February 2020. Local data  
25 collectors obtained informed consent from all individual participants included in the study in the local language, Odiya. Participants  
26 under the age of 18 were required to obtain the written permission of one parent or legal guardian. Data collectors orally administered  
27 a one-on-one survey to all participants, which assessed demographic information, psychosocial factors, and anemia-related behaviors.  
28  
29  
30  
31  
32  
33  
34  
35

### 36 **Inclusion Criteria**

37  
38  
39  
40  
41  
42  
43  
44  
45  
46  
47

1  
2  
3 Women were eligible for inclusion in the study if they were between the ages of 15 and 49, spoke Odiya, lived in the data  
4 collection villages (either treatment or control), and did not plan to move in the next year (as this is a longitudinal study).  
5  
6

## 7 8 **Measures**

9  
10 **Dependent Variables.** The RANI study was evaluating the efficacy of a norms-based intervention to increase IFA use and  
11 reduce anemia. Therefore, our study has two dependent variables: self-reported IFA use and objectively measured serum hemoglobin  
12 levels. We measured *IFA use at midline* using the interview question, “Have you ever eaten/taken an iron tablet or syrup.” (The  
13 interviewer then held up the packet of IFA tablets for the interviewee to see). We coded this as a dichotomous variable, scored 1 if  
14 currently taking and 0 if not or did in the past but stopped now. We obtained *hemoglobin levels* from all participants at midline  
15 through point-of-care hemoglobin tests using a HemoCue photometer (in line with India’s National Family Health Survey  
16 methodology). This instrument provides hemoglobin levels immediately and accurately [26].  
17  
18  
19  
20  
21  
22  
23  
24  
25

26 **Independent Variables (Exposure to the Intervention).** We examined four independent variables. The first is a dichotomous  
27 indicator of *treatment assignment* that takes the value 1 for participants residing in intervention villages and 0 for those residing in  
28 control villages. The other three independent variables are participants’ self-reports of exposure to different components of the RANI  
29 intervention. To measure *exposure to the participatory learning modules*, we took the sum of responses to six questions about how  
30 often participants had seen materials from these sessions. We used visual images from the sessions, with higher scores indicating more  
31 exposure or more frequent exposure (not seen = 0, seen once or twice = 1, and seen more than twice = 2). Each image came from a  
32 different participatory learning module. One question asked whether or not they had participated in any of the games that were also a  
33  
34  
35  
36  
37  
38  
39  
40  
41  
42  
43  
44  
45  
46  
47

1  
2  
3 part of the RANI participatory group sessions (scored as No=0 and Yes=1). Less than 1% of participants ( $n=28$ ) marked “don’t know”  
4  
5 (which was coded as missing). We coded exposure to participatory learning sessions as a continuous variable (range 0-11). We  
6  
7 assessed participants’ *own anemia testing* (exposure to the anemia testing component of the intervention) with the question, “How  
8  
9 many times have you been tested for anemia as part of the RANI intervention in the last six months?” Response options ranged from 0  
10  
11 (never) to 4 (more than 3 times). We also coded testing for anemia as a continuous variable (range 0-4). We measured *exposure to the*  
12  
13 *RANI Comm videos* as the sum of responses to four questions about which of the four videos they had watched. Interviewers shared an  
14  
15 image from each video and a brief description of the story plot. Responses were treated as a continuous variable and summed across  
16  
17 the four videos for a range from 0 to 4. We assessed *communicating with others about intervention components* with three separate  
18  
19 questions: “Talked about blood tests when talking about RANI to friends or family;” “Talked about videos when talking about RANI  
20  
21 to friends or family;” and “Talked about RANI meetings (group education modules) when talking about RANI to friends or family.”  
22  
23 For each, an affirmative response was coded 1 and a negative response was coded 0.  
24  
25  
26  
27

28 **Control Variables.** We asked respondents their *age*, highest completed level of *education*, and whether they belonged to a *scheduled*  
29  
30 *tribe*. *IFA use at baseline* was assessed exactly as described above for midline. We asked respondents about the *number of children*  
31  
32 they had and whether or not they were *breastfeeding*. Additionally, to understand if participants had been exposed to another  
33  
34 intervention that was not affiliated with RANI (to avoid contamination), we asked participants, “Did you hear anything about nutrition  
35  
36 or iron tablets from the Swabhimaan or any other program?” We coded this as a dichotomous variable (No or don’t know = 0 and Yes  
37  
38 = 1).  
39  
40  
41  
42  
43  
44  
45  
46  
47

## Statistical Analysis

We conducted our analyses in three steps. First, we calculated frequencies and descriptive statistics of all key analytic variables by treatment and control arm and obtained p-values testing the null hypothesis of no difference between the two arms via linear and logistic for continuous and categorical variables, respectively. These analyses covered several socioeconomic and health-related background variables; amount of exposure to each of the three intervention components between baseline and midline; and hemoglobin levels and self-reported IFA use at midline. The latter provided unadjusted intention-to-treat estimates of the overall RANI treatment effect on these primary endpoints at midline.

Second, we ran linear regressions to examine if exposure to each intervention component varied by select sociodemographic factors: age (32 years or older versus below 32 years old), belonging to a schedule caste or not, and education (completed primary school or not). These analyses were limited to residents of clusters assigned to the RANI intervention arm.

Third, we ran a series of regression models to examine how each intervention component individually and additively affected hemoglobin levels (linear) and IFA use (logistic) at midline and accounted for the overall effect of treatment assignment. For each outcome, Model 1 includes only control variables (age, education, currently breastfeeding, number of children, whether they belong to a scheduled caste or tribe, knowing anemia status at baseline, IFA use at baseline, and whether the participant reported exposure to a non-RANI intervention) and RANI treatment assignment. The coefficients on RANI treatment assignment in these models represent adjusted intention-to-treat estimates for each outcome. In Model 2, we add a set of dummy variables representing levels of exposure to the first RANI intervention component, group education sessions, with zero sessions as the reference category. The dummy variable

1  
2  
3 specification provides flexibility in the nature of the relationship between number of group education sessions attended and the two  
4  
5 outcome variables. The coefficients on the dummy variables in this model represent how midline hemoglobin and self-reported IFA  
6  
7 use vary in relation to number of group education sessions attended. Moreover, comparison of the coefficient on the RANI treatment  
8  
9 assignment variable in this model to the analogous coefficient in Model 1 provides insight into the extent to which group education  
10  
11 sessions contributed to the overall effect of RANI. The next two models are similar to Model 2 but using hemoglobin testing (Model  
12  
13 3) and viewing of RANI Comm videos (Model 4) instead of group education session attendance. Finally, Model 5 includes all three  
14  
15 intervention components. The coefficients on the intervention component dummy variables in this model provide some insight into the  
16  
17 unique contribution of each component, independent of the other two. And comparison of the coefficient on the RANI treatment  
18  
19 assignment dummy variable in this model to the corresponding coefficient from Model 1 represents the extent to which the three  
20  
21 intervention components jointly contributed to the overall RANI intervention effect. We used Stata version 16 to conduct all analyses,  
22  
23 with Huber-White clustered standard errors [27] to account for the sampling and cluster randomization design.  
24  
25  
26  
27

## 28 **Results**

29  
30  
31 Description of the sample included in our study is shown in Panel A of Table 2. Average age was 31 years old and between a  
32  
33 quarter and a third of participants were a part of the tribal population. On average, participants completed primary school (6 years of  
34  
35 education). Participants in both treatment and control arms had on average more than one child and fewer than two. About 21% of  
36  
37 women in both arms were currently breastfeeding. The only statistically significant difference between the treatment and control arms  
38  
39 was age. Women in the treatment arm were 31 years old versus 30 years old in the control arm ( $p < .05$ ). All other demographics were  
40  
41  
42  
43  
44



1  
2  
3 not statistically different by treatment and control. Panel B of Table 2 shows that exposure to non-RANI interventions was low in both  
4  
5 study arms.  
6

7  
8 Crude estimates of the effects of the RANI intervention at midline are shown in Panel C of Table 2. Participants from the  
9  
10 treatment arm reported more IFA use at midline (32%) compared to the control arm (3%) ( $p < .001$ ). However, hemoglobin levels  
11  
12 were not statistically different in the two arms (11.7% versus 11.5%) ( $p = .28$ ) (see Appendix Table 1). Panel D of Table 2 shows that  
13  
14 exposure to each of the intervention components was widespread among participants in the treatment arm and low among participants  
15  
16 in the control arm. Specifically, 88% of participants in the treatment arm compared to only 12% in the control arm reported that they  
17  
18 attended at least one group educational session ( $p < .001$ ). Over eighty percent of participants in the treatment arm reported that they  
19  
20 had been tested at least once as part of the intervention compared to 0% in the control arm ( $p < .001$ ). Similarly, 80% of women in  
21  
22 the treatment arm reported that they watched one or more RANI Comm videos, compared to less than 1% in the control arm ( $p =$   
23  
24  $< .001$ ). Lastly, exposure to interventions other than RANI was minimal across both the treatment and control arms (Panel B, 1.2% and  
25  
26 2.1%, respectively).  
27  
28  
29

30  
31 Table 3 shows that less educated women attended more educational sessions (4.77 compared to 4.46;  $p < .05$ ) but more  
32  
33 educated women had a higher average number of anemia tests (1.32 compared to 1.22;  $p < .05$ ). Table 3 also shows that neither age  
34  
35 nor caste or tribal background was associated with exposure to the intervention.  
36

37  
38 As there was no crude difference between the treatment and control arms in hemoglobin level at midline (see Panel C of Table  
39  
40 2), we included the analyses linking exposure to specific intervention components to hemoglobin levels as an appendix (See Appendix  
41  
42  
43  
44  
45  
46  
47

1  
2  
3 Table 1). However, nested logistic regression models predicting self-reported IFA use as a function of study arm and exposure to each  
4 of the intervention components are presented in Table 4. As seen in Model 1, after controlling for demographic variables and IFA use  
5 at baseline, simply being in the treatment arm increased a woman's odds of taking IFA by more than 16 times (OR = 16.94;  $p <$   
6  
7  
8  
9  
10 .001). In Model 2, we added exposure to the group education sessions and found that each session that a woman attended significantly  
11 increased her odds of taking IFA. Model 3 suggests that each additional test for anemia also significantly increased the odds of taking  
12 IFA. Model 4 similarly shows that for each RANI Comm video that a woman watched increased her odds of taking IFA increased.  
13  
14  
15  
16  
17 Model 5 with all intervention components included shows that while all effect sizes drop (including the effect of RANI treatment  
18 assignment), each component still had a significant effect on IFA use This indicates that each component explains a unique part of the  
19  
20  
21  
22  
23 variance in current use of IFA.

### 24 Discussion

25  
26 In this paper we present findings from the midline interim assessment of a multicomponent behavioral intervention intended to  
27 increase IFA use and decrease anemia among women of reproductive age in Odisha, India. We find strong evidence that the  
28  
29  
30  
31  
32 intervention increased the prevalence of self-reported IFA use among non-pregnant women, but no evidence of an effect of the  
33  
34  
35  
36  
37  
38  
39  
40  
41  
42  
43  
44  
45  
46  
47 intervention on average hemoglobin levels in that group. Self-reported exposure to all three intervention components was high among  
women in the treatment arm, which did not vary substantially by age or membership in a scheduled caste or tribe. However, exposure  
to anemia testing was higher among more educated women and exposure to group sessions was higher among less educated women.

1  
2  
3 Self-reported exposure to all three intervention components was positively associated with IFA use, and these exposures accounted for  
4  
5 most but not all the overall effect of the RANI intervention on IFA use among non-pregnant women.  
6  
7

8         Given that we saw very little difference in exposure to the intervention components by age, education or caste, it appears that  
9  
10 the RANI Project's outreach efforts did not disproportionately favor those with higher privilege in society. Indeed, even though  
11  
12 exposure to the intervention did not differ by tribal status or age, in our multivariate models we found some evidence that those with  
13  
14 lesser education had higher IFA uptake. We view this finding rather optimistically, given that interventions have the potential for  
15  
16 exacerbating existing differences in society along access and socioeconomic lines [28], as has been documented by the literature on  
17  
18 the knowledge gap hypothesis [29-30].  
19  
20

21         We saw strong evidence that testing women for anemia (through finger-prick hemoglobin counts) was associated with IFA  
22  
23 uptake: those who got tested more often were more likely to consume IFA tablets. The reasons for this are not known precisely, but  
24  
25 we do have a few explanations. First, it could be that testing revealed to women the low hemoglobin counts, which spurred them to act  
26  
27 to improve their scores. Our formative assessment had revealed that feeling weak was often a part of women's self-identity, with  
28  
29 women often believing that fatigue was par for the course [19] and that this was part of the gendered norms for women [20]. We  
30  
31 suspect that, in contrast, an objective measure of iron in the blood, observed through hemoglobin testing, quantified and thus provided  
32  
33 precision to a phenomenon woman had come to accept as a vague notion of fatigue. We found that testing was highly demanded and  
34  
35 motivational. Indeed, our process evaluation data indicate that, despite a high (60%) coverage rate of anemia testing for women in our  
36  
37  
38  
39  
40  
41  
42  
43  
44  
45  
46  
47

1  
2  
3 intervention catchment areas, we have been unable to meet the demand for testing and repeat testing. If we were able to meet the demand,  
4  
5 the impact of testing may have been even higher.  
6

7  
8 A second reason why testing may have motivated women to consume IFA tablets pertains to observational learning around  
9  
10 social norms. Due to test results being displayed publicly in the community, and most educational sessions linked the test results with  
11  
12 IFA consumption, women likely came to link their consumption behaviors with hemoglobin readings – not only for themselves but  
13  
14 also for what they had observed among others in their community, where hemoglobin testing was a monthly event. These events were  
15  
16 so popular that, in some villages, the waiting list for testing ran up to 90 names (we were unable to accommodate more than 15 women  
17  
18 per village per month, given the study design and resources). This public display of IFA testing and hemoglobin results also  
19  
20 normalized women prioritizing their own health potentially shifting gender norms that solely focus on pregnant women’s health or the  
21  
22 health of the family. Although these underlying reasons are somewhat speculative, they do point to the need to study more precisely  
23  
24 the link between testing and IFA consumption.  
25  
26  
27

28  
29 Each educational participatory learning session that women attended significantly increased IFA use. These sessions were  
30  
31 designed primarily to raise awareness and improve knowledge about anemia, iron-rich foods, and diet diversity. We also included  
32  
33 discussions about gender roles, how eating order in the home disfavors women’s health, and the need to remain strong to be able to  
34  
35 take care of others. We have few reasons to believe that knowledge in these domains would directly translate into behaviors. However,  
36  
37 a significant body of work demonstrates that knowledge about health is a necessary, though not sufficient, condition for behavior  
38  
39  
40  
41  
42  
43  
44  
45  
46  
47

1  
2  
3 change [31 - 32] and that people often hold knowledge in abeyance, to be acted upon at the appropriate time [33]. From this  
4  
5 perspective, it seems that educational sessions may have played an important role.  
6  
7

8 Finally, we found that exposure to the communication videos was also significantly associated with increased IFA uptake. We  
9  
10 suspect that the underlying reason for this finding pertains to another normative component of the intervention. The four videos we  
11  
12 developed targeted different audiences, including adolescents, husbands, mothers-in-law, and women of reproductive age. As an  
13  
14 explicit campaign strategy, each video was shown to each of the parties, including those who were not the explicit target audience for  
15  
16 the particular video. This was done so that each group came to understand that the other groups were also being targeted by the  
17  
18 intervention. So, for example, adolescent girls saw that there were videos that also addressed men and older women. Similarly, men  
19  
20 saw that the videos targeted other men and other women. The overall strategy was to communicate the message that the entire  
21  
22 community was engaged in the task of reducing anemia.  
23  
24  
25

26 In this paper, we assessed how each of the intervention components affected IFA use. This helps elucidate where this  
27  
28 intervention should focus for the remaining trial, provides a clear picture of dose response, and highlights where other social norms  
29  
30 program implementors may want to focus their efforts. In another midline paper, we assessed the effect of social norms on IFA use  
31  
32 and found that changes in descriptive and collective norms (but not injunctive norms) were associated with changes in self-reported  
33  
34 IFA use [34].  
35  
36  
37

38 It is also important to discuss the lack of an effect of the RANI intervention on hemoglobin use despite an increase in self-  
39  
40 reported IFA use. One plausible explanation of these disparate findings is that the increase in IFA use among members of the  
41  
42  
43  
44  
45  
46  
47

1  
2  
3 treatment arm is real but is not sufficient in magnitude or duration to produce a corresponding increase in hemoglobin levels.

4  
5 Alternatively, it could be attributable to differential misreporting of IFA use among treatment group members, a form of courtesy or  
6  
7 social desirability bias. Findings from the end line data collection, planned to take place at the end of the project, may help to  
8  
9 adjudicate between these two explanations.  
10

11  
12 Of course, our study is not without limitations. First and foremost, while treatment assignment is objectively measured on the  
13  
14 basis of project administrative data, exposure to the three intervention components is self-reported and may be subject to some level of  
15  
16 misreporting. Furthermore, it is possible that women who participate in the intervention may be more motivated to change behavior in  
17  
18 general and are already more inclined to take IFA. Therefore, Table 4 could overstate the effects on IFA use of exposure to the  
19  
20 intervention components, as well as the contributions of those components to the overall RANI effect. However, IFA use is still a  
21  
22 result of participating in the RANI intervention, as participation led to IFA use so we may have simply captured women who were  
23  
24 farther along in their readiness to change. Additionally, although our study used a representative sample of areas and women in our  
25  
26 focal areas, findings may not be generalizable outside of that setting.  
27  
28

29  
30 Despite these limitations, our study has strengths: the intervention is based on formative research; it is co-designed by  
31  
32 stakeholders from the area; we use a theoretically driven and adaptive approach; and the study design itself is robust, with an  
33  
34 underlying randomization to experimental arms.  
35  
36

### 37 **Conclusion**

38  
39  
40  
41  
42  
43  
44  
45  
46  
47

1  
2  
3 Our findings show that a social norms-based intervention can be successful in increasing IFA use. They also demonstrate that  
4 unique intervention components separately and altogether impact this success. All three components appear to contribute something to  
5 the overall effect of the intervention. While all three intervention components tapped into social norms messaging, hemoglobin testing  
6 provided individual health information, village level health information, a comparison to other villages, and changes in health  
7 information over time. This multi-level component, coupled with the other two components, may help women reach the tipping point  
8 to take and adhere to IFA. While IFA use shows promise, hemoglobin levels may need more time to show significant changes,  
9 especially among non-pregnant women who were not taking IFA and who only take it weekly. End line results will elucidate more  
10 information about the full RANI intervention effects.  
11  
12  
13  
14  
15  
16  
17  
18  
19  
20  
21  
22  
23  
24  
25  
26  
27  
28  
29  
30  
31  
32  
33  
34  
35  
36  
37  
38  
39  
40  
41  
42  
43  
44  
45  
46  
47

Review only

1  
2  
3  
4  
5  
6  
7  
8  
9  
10  
11  
12  
13  
14  
15  
16  
17  
18  
19  
20  
21  
22  
23  
24  
25  
26  
27  
28  
29  
30  
31  
32  
33  
34  
35  
36  
37  
38  
39  
40  
41  
42  
43  
44  
45  
46  
47

**Trial Registration**

This trial was registered with Clinical Trial Registry- India (CTRI) (CTRI/2018/10/016186) on 29 October 2018.

**Funding**

This work was supported by a grant from The Bill and Melinda Gates Foundation (OPP1182519) to the George Washington University, Rajiv N. Rimal, principal investigator. The funders had no role in study design, data collection and analysis, decision to publish, or preparation of the manuscript.

**Author Contribution Statement**

ES: Conceptualization, methodology, analysis, writing – original draft

IP: Conceptualization, methodology, writing – review & editing

JB: Methodology, writing – review & editing

HY: Methodology, data curation, writing – review & editing

LP: Project administration, supervision, writing – review & editing

SM: Project administration, supervision, writing – review & editing

RG: writing – review & editing

RR: Conceptualization, methodology, supervision, funding acquisition, writing – review & editing

The authors have no competing interests.

**Data sharing statement:**

Data used for this study can be found in our online data repository: [GW Scholarspace \(https://scholarspace.library.gwu.edu/\)](https://scholarspace.library.gwu.edu/) and can also be requested from the first author.

**Table 1. Description of RANI intervention activities**

|                                              |
|----------------------------------------------|
| <b>Group participatory learning sessions</b> |
|----------------------------------------------|



1  
2  
3 We developed ten one-hour-long group participatory learning modules on various topics  
4 related to anemia prevention, including iron folic acid supplementation, diet diversity, and  
5 social norms/gender norms that may impact a woman's ability to take iron supplements. These  
6 monthly group participatory learning sessions are delivered through in-person activities and  
7 games. Women and their social networks (e.g., husbands and mothers-in-law) were all invited  
8 to participate so that women and those important to her are being exposed to the same  
9 messaging. We covered four participatory learning modules before midline data collection.  
10  
11 Testing sessions lasted for an hour as community/group testing was followed up by  
12 demonstration of results and behavioral nudges for improving their Hb count.  
13  
14  
15  
16  
17  
18  
19  
20  
21  
22  
23

#### 24 **RANI Comm videos**

25  
26 We created four RANI Comm videos in the local language, Odiya, with local residents as  
27 actors. These videos highlighted the stories of women overcoming barriers related to IFA  
28 consumption and other social norms prevalent in the area. The videos were shown on  
29 smartphones and tablets to both individuals and small groups. The videos targeted various  
30 audiences (pregnant women, non-pregnant women, husbands, and mothers-in-law) and  
31 addressed barriers and facilitators to IFA use that we identified in the formative research  
32  
33  
34  
35  
36  
37  
38  
39  
40  
41  
42  
43  
44  
45  
46  
47

1  
2  
3 followed by group discussion sessions. Descriptive and injunctive norms messages around IFA  
4  
5 consumption were included in each storyline. An example of injunctive norms messaging in  
6  
7 the storyline is a mother-in-law expressing that her daughter-in-law should be taking care of  
8  
9 herself too, not just looking after the family, and should be taking weekly IFA to avoid anemia  
10  
11 even if she is not pregnant. A new video was rolled out every 2-3 months. The viewing time  
12  
13 for one video was approximately 15 minutes. Even though videos were 3-4 minutes long, the  
14  
15 pre and post viewing discussion took an additional 10 minutes. Participants could have seen  
16  
17 the same video more than once.  
18  
19  
20

### 21 22 **Community based hemoglobin testing**

23  
24 We also conducted monthly anemia testing of the women using a digital Hemocue meter.  
25  
26 These instant results are shared at the individual, group, and village levels with the help of  
27  
28 blood shaped cards (different colors indicating anemia severity) and infographics appropriate  
29  
30 for a low literacy population. Monthly community-based testing was followed by a discussion  
31  
32 about trends in anemia and village-level comparisons (based on the hemoglobin readings) with  
33  
34 neighboring communities at both the individual and community levels. This provides ipsative  
35  
36 feedback (information people receive about their ongoing progress over time), normative  
37  
38  
39  
40  
41  
42  
43  
44  
45  
46  
47

feedback (information about the particular individual's achievements relative to those of her social peer), and aspirational feedback (comparisons people make between their current state of affairs and the goals they may have set for themselves).

\* Community Facilitators of the RANI team delivered the intervention. However, IFA tablets were provided by the community health workers. RANI started off using key influencers in the village like front line health workers to gather people for the intervention. However, as our facilitators became familiar with the community, we also accepted RANI volunteers (women from the community) who facilitated this. Some of the interventions were delivered at the household level also.

**Table 2. Description of Participants by Study Arm**

|                                                 | Treatment<br>(n=1874) | Control<br>(n=1867) | p-value |
|-------------------------------------------------|-----------------------|---------------------|---------|
| <b>Demographic</b>                              |                       |                     |         |
| Age (years)                                     | 31.2                  | 30.5                | 0.022   |
| Part of tribal pop                              | 23.6%                 | 31.7%               | 0.267   |
| Education (years)                               | 6.07                  | 6.17                | 0.749   |
| Breastfeeding at baseline                       | 21.4%                 | 21.7%               | 0.836   |
| Number of children at baseline                  | 1.69                  | 1.68                | 0.851   |
|                                                 |                       |                     |         |
| Exposure to non-RANI interventions              | 1.2%                  | 2.1%                | 0.283   |
|                                                 |                       |                     |         |
| <b>Dependent variables</b>                      |                       |                     |         |
| IFA use at midline                              | 32.0%                 | 3.0%                | <0.001  |
| Hemoglobin at midline (g/dl)                    | 11.66                 | 11.52               | 0.281   |
|                                                 |                       |                     |         |
| <b>Exposure to RANI intervention components</b> |                       |                     |         |
| Number of group education sessions attended     | 4.60                  | 0.23                | <0.001  |

|                                               |       |       |        |
|-----------------------------------------------|-------|-------|--------|
| Attended at least one group education session | 88.6% | 12.1% | <0.001 |
| Number of hemoglobin tests undergone          | 1.28  | 0.00  | <0.001 |
| Tested for hemoglobin at least once           | 81.4% | 0.0%  | <0.001 |
| Number of RANI Comm videos views              | 2.46  | 0.00  | <0.001 |
| Viewed at least one RANI Comm video           | 79.8% | 0.2%  | <0.001 |

Notes: *T*-tests compare demographic differences between treatment versus control arms. Significant cells are in bold. IFA = iron folic acid. *T*-tests compare IFA use and exposure to different intervention components by treatment and control arms. Significant cells are in bold. The other non-RANI related intervention includes anemia related education as one component that may have had some overlap with our intervention. We included this as a control in our models to ensure that any changes in behavior are a result of our intervention alone.

Table 3. Exposure to intervention components by age, education, and caste (treatment arm participants)

|                                 | Average number of group educational sessions attended | Average number of hemoglobin tests undergone | Average number pf RANI Comm videos seen |
|---------------------------------|-------------------------------------------------------|----------------------------------------------|-----------------------------------------|
| <b>Age</b>                      |                                                       |                                              |                                         |
| Less than 32 years              | 4.48 (SD: 2.82)                                       | 1.33 (SD: 1.04)                              | 2.41 (SD: 1.55)                         |
| 32 years or more                | 4.74 (SD: 2.95)                                       | 1.22 (SD: 0.95)                              | 2.53 (SD: 1.55)                         |
| p-value                         | 0.219                                                 | 0.056                                        | 0.119                                   |
| <b>Education</b>                |                                                       |                                              |                                         |
| Up to completed primary         | 4.77 (SD: 2.88)                                       | 1.22 (0.93)                                  | 2.55 (SD: 1.55)                         |
| More than completed prim        | 4.46 (SD: 2.88)                                       | 1.32 (1.05)                                  | 2.40 (SD: 1.55)                         |
| p-value                         | 0.040                                                 | 0.033                                        | 0.132                                   |
| <b>Scheduled Tribe or Caste</b> |                                                       |                                              |                                         |
| Yes                             | 4.54 (SD: 2.87)                                       | 1.28 (SD: 1.00)                              | 2.44 (SD: 1.56)                         |
| No                              | 4.78 (SD: 2.90)                                       | 1.29 (SD: 1.01)                              | 2.55 (SD: 1.52)                         |
| p-value                         | 0.429                                                 | 0.899                                        | 0.407                                   |

\*SD = Standard deviations

Table 4. Adjusted odds ratios from logistic regression models predicting self-reported IFA use at midline as a function of treatment assignment, exposure to three intervention components, and control variables

|                           | Model 1  | Model 2  | Model 3  | Model 4 | Model 5 |
|---------------------------|----------|----------|----------|---------|---------|
| RANI Intervention Overall | 16.94*** | 5.24***  | 3.62***  | 5.16*** | 2.25*   |
| Group education sessions  |          |          |          |         |         |
| 1 (vs. 0)                 |          | 1.50     |          |         | 1.17    |
| 2 (vs. 0)                 |          | 2.89***  |          |         | 1.71*   |
| 3 (vs. 0)                 |          | 2.94***  |          |         | 1.37    |
| 4 (vs. 0)                 |          | 3.05***  |          |         | 1.30    |
| 5 (vs. 0)                 |          | 3.80***  |          |         | 1.43    |
| 6 (vs. 0)                 |          | 5.37***  |          |         | 1.76*   |
| 7 (vs. 0)                 |          | 5.39***  |          |         | 1.39    |
| 8 (vs. 0)                 |          | 8.53***  |          |         | 2.41*   |
| 9 (vs. 0)                 |          | 8.16***  |          |         | 2.30**  |
| 10 (vs. 0)                |          | 9.23***  |          |         | 2.23*   |
| 11 (vs. 0)                |          | 11.97*** |          |         | 2.81**  |
| Anemia testing            |          |          |          |         |         |
| 1 (vs. 0)                 |          |          | 4.91***  |         | 3.07*** |
| 2 (vs. 0)                 |          |          | 6.93***  |         | 3.72*** |
| 3 (vs. 0)                 |          |          | 11.94*** |         | 5.65*** |
| 4+ (vs. 0)                |          |          | 12.91*** |         | 4.90*** |
| RANI Comm videos          |          |          |          |         |         |
| 1 (vs. 0)                 |          |          |          | 2.30*** | 1.44    |
| 2 (vs. 0)                 |          |          |          | 2.85*** | 1.59    |
| 3 (vs. 0)                 |          |          |          | 3.57*** | 1.72*   |
| 4+ (vs. 0)                |          |          |          | 5.66*** | 2.39*** |
| Control Variables         |          |          |          |         |         |
| Age                       | 0.99     | 0.99     | 1.00     | 0.99    | 0.99    |
| Education                 | 0.98     | 0.97     | 0.97     | 0.98    | 0.97    |
| Breastfeeding             | 1.35*    | 1.37*    | 1.41*    | 1.41**  | 1.43**  |

1  
2  
3  
4  
5  
6  
7  
8  
9  
10  
11  
12  
13  
14  
15  
16  
17  
18  
19  
20  
21  
22  
23  
24  
25  
26  
27  
28  
29  
30  
31  
32  
33  
34  
35  
36  
37  
38  
39  
40  
41  
42  
43  
44  
45  
46  
47

|                                 |         |         |         |         |         |
|---------------------------------|---------|---------|---------|---------|---------|
| Number of children              | 0.99    | 0.96    | 0.96    | 0.97    | 0.95    |
| Caste/Tribe                     | 1.31*   | 1.26    | 1.31*   | 1.28    | 1.26    |
| Knows anemia status at baseline | 1.00    | 1.00    | 1.00    | 1.00    | 1.00    |
| Baseline IFA use                | 2.59*** | 2.94*** | 3.30*** | 2.87*** | 3.36*** |
| Non-RANI intervention exposure  | 1.85    | 1.28    | 1.57    | 1.59    | 1.36    |
| Pseudo R2                       | 0.20    | 0.24    | 0.24    | 0.23    | 0.26    |

Notes: \* $p < .05$ , \*\* $p < .01$ , \*\*\* $p < .00$

**Ethical Approval Statement**

This study was approved by the George Washington University Institutional Review Board (FWA00005945), Sigma Science and Research, an independent IRB located in New Delhi, India, and the Indian Council for Medical Research’s Health Ministry’s Screening Committee.

For peer review only

## References

1. Reno, R. R., Cialdini, R. B., & Kallgren, C. A. (1993). The trans situational influence of social norms. *Journal of personality and social psychology*, 64(1), 104.
2. Yemin, P., Fei, M., Lahlou, S., & Levy, S. (2019). Using social norms to change behavior and increase sustainability in the real world: A systematic review of the literature. *Sustainability*, 11(20), 5847.
3. Simone Francis, Prabin Nanicha Shrestha, Binita Shrestha, Gemma Ferguson , Brian Batayeh, Monique Hennink & Cari Jo Clark (2020): The Influence of Organised Diffusion on Social Norms Change: Addressing Intimate Partner Violence in Nepal, *Global Public Health*, DOI: 10.1080/17441692.2020.1845767
4. Clark, C. J., Bergenfeld, I., Batayeh, B., Ferguson, G., Shrestha, B., & Shrestha, P. N. (2019). Intimate partner violence in Nepal: Change starts at home study, what works to prevent violence: A global programme to prevent violence against women and girls evidence brief. South Africa Medical Research Council.
5. Shell-Duncan, B., Wander, K., Hernlund, Y., & Moreau, A. (2011). Dynamics of change in the practice of female genital cutting in Senegambia: testing predictions of social convention theory. *Social science & medicine* (1982), 73(8), 1275–1283. <https://doi.org/10.1016/j.socscimed.2011.07.022>
6. Vaitla, Bapu, Alice Taylor, Julia Van Horn, and Ben Cislighi. 2017. *Social Norms and Girls' Well-Being: Linking Theory and Practice*. Washington, D.C.: Data2X.
7. Nagata, J. M., Gatti, L. R., & Barg, F. K. (2012). Social determinants of iron supplementation among women of reproductive age: a systematic review of qualitative data. *Maternal & child nutrition*, 8(1), 1-18.
8. Sedlander, E., Long, M., Mohanty, S., Munjral, A., Bingenheimer, J., Yilma, H., Rimal, R. N. (2020). Moving Beyond Individual Barriers and Identifying Multi-level Strategies to Address Anemia in Rural India. *BMC Public Health*, 20:457.
9. Rimal, R. N., Lapinski, M. K., Cook, R. J., & Real, K. (2005). Moving toward a theory of normative influences: How perceived benefits and similarity moderate the impact of descriptive norms on behaviors. *Journal of health communication*, 10(5), 433-450.
10. Rimal, R. N., & Real, K. (2005). How behaviors are influenced by perceived norms: A test of the theory of normative social behavior. *Communication research*, 32(3), 389-414.
11. Chung, A., and Rimal, R. N. (2016). Social norms: a review. *Rev. Commun. Res.* 4, 1–29. doi: 10.12840/issn.2255-4165.2016.04.01.008
12. Dempsey, R., McAlaney, J., Bewick, B. (2018). A Critical Appraisal of the Social Norms Approach as an Interventional Strategy for Health-Related Behavior and Attitude Change. *Frontiers in Psychology*, 6. <https://doi.org/10.3389/fpsyg.2018.02180>
13. Cislighi, B., Nkwi, P., Mackie, G & Shakya, H. (2020). Why context matters for social norms interventions: The case of child marriage in Cameroon, *Global Public Health*, 15:4, 532-543, DOI: 10.1080/17441692.2019.1704818
14. Edberg, M., & Krieger, L. (2020). Recontextualizing the social norms construct as applied to health promotion.. *SSM-Population Health*, 10 (). <http://dx.doi.org/10.1016/j.ssmph.2020.100560>
15. Pant, I., Patro, L., Sedlander, E., Gupta, K., Chandarana, S., Rimal, R. Monitor to Innovate with Feedback Loops: Process Evaluation Protocol for an Anemia Prevention Intervention. Study Protocol. Research Square. 10.21203/rs.3.rs-389608/v1

16. Davis, C.A.; Heiman, J.R.; Menczer, F. A Role for Network Science in Social Norms Intervention. *Procedia Comput. Sci.* 2015, 51, 2217–2226.
17. International Institute for Population Sciences (IIPS) and ICF. National family health survey (NFHS-4), India, 2015–16: Odisha. Mumbai: IIPS; 2017
18. Gourlay, A., G. Mshana, I. Birdthistle, G. Bulugu, B. Zaba, and M. Urassa. 2014. “Using vignettes in qualitative research to explore barriers and facilitating factors to the uptake of prevention of mother-to-child transmission services in rural Tanzania: A critical analysis,” *BMC Medical Research Methodology* 14(1): 21.
19. Yilma, H., Sedlander, E., Rimal, R. N., Pattnaik, S. (2020). Anemia reduction in India: exploring fatigue as a cue to seek treatment. *BMJ Global Health.* 10:e037471.
20. Sedlander, E., Ladwa, C., Talegawkar, S., Ganjoo, R., Rimal, R. N. (2021). How Gender Norms affect Anemia in Rural, Odisha India: a Qualitative Study. *Journal of Nutrition.* 111159
21. Sedlander, E. Long, M., Bingenheimer, J., Rimal, R. (2021). Examining intentions to take iron folic acid supplements to inform a behavioral intervention: The Reduction in Anemia through Normative Innovations (RANI) Project. *PLOS One.* 16(5): e0249646. <https://doi.org/10.1371/journal.pone.0249646>
22. [dataset] Long, M., Sedlander, E., Bingenheimer, J., Rimal, R. Data from Examining intentions to take iron supplements to inform a behavioral intervention: The Reduction in Anemia through Normative Innovations (RANI) Project, 2019. <https://scholarspace.library.gwu.edu/work/gx41mj67p>
23. Yilma, H., Sedlander, E., Rimal, R. N., Pant, I. Munjral, A., Mohanty, S. (2020). The Reduction in Anemia through Normative Innovations (RANI) Project: Study Protocol for a Cluster Randomized Controlled Trial in Odisha, India. *BMC Public Health,* 20(1):203.
24. World Health Organization. (2018). Weekly iron and folic acid supplementation as an anaemia-prevention strategy in women and adolescent girls: lessons learnt from implementation of programmes among non-pregnant women of reproductive age. World Health Organization. <https://apps.who.int/iris/handle/10665/274581>. Accessed February 4, 2021.
25. Intensified National Iron Plus Initiative (I-NIPI). (2018). Ministry of Health and Family Welfare, Government of India. Anemia Mukht Bharat. [https://anemiamukhtbharat.info/wp-content/uploads/2019/09/Anemia-Mukht-Bharat-Brochure\\_English.pdf](https://anemiamukhtbharat.info/wp-content/uploads/2019/09/Anemia-Mukht-Bharat-Brochure_English.pdf) Accessed February 22, 2021.
26. Sanchis-Gomar F, Cortell-Ballester J, Pareja-Galeano H, Banfi G, Lippi G. Hemoglobin point-of-care testing: the HemoCue system. *J Lab Automation.* 2012;18(3):198–205.
27. Rogers, W.H. (1993). Regression standard errors in clustered samples. *Stata Tech Bull;* 13 (Reprinted in *Stata Technical Bulletin Reprints,* 3: 88–94): 19-23.
28. Viswanath, K., & Kreuter, M. W. (2007). Health disparities, communication inequalities, and eHealth. *American journal of preventive medicine,* 32(5), S131-S133.
29. Donohue, G. A., Tichenor, P. J., & Olien, C. N. (1975). Mass media and the knowledge gap: A hypothesis reconsidered. *Communication research,* 2(1), 3-23.
30. Viswanath, K., & Finnegan Jr, J. R. (1996). The knowledge gap hypothesis: Twenty-five years later. *Annals of the International Communication Association,* 19(1), 187-228.
31. Girma, E., Gebretsadik, L. A., Kaufman, M. R., Rimal, R. N., Morankar, S. N., & Limaye, R. J. (2014). Stigma against people with HIV/AIDS in rural Ethiopia, 2005 to 2011: signs and predictors of improvement. *AIDS and Behavior,* 18(6), 1046-1053.



- 1  
2  
3 32. Rimal, R. N. (2000). Closing the knowledge-behavior gap in health promotion: The  
4 mediating role of self-efficacy. *Health communication, 12*(3), 219-237.  
5  
6 33. Rimal, R. N., Flora, J. A., & Schooler, C. (1999). Achieving improvements in overall  
7 health orientation: Effects of campaign exposure, information seeking, and health media  
8 use. *Communication Research, 26*(3), 322-348.  
9  
10 34. Rimal, R. N., Yilma, H., Sedlander, E., Mohanty, S., Patro, L., Pant, I., Khuntia, S. K., Swain,  
11 M., & Behera, S. (2021). Iron folic acid consumption and changing social norms: Cluster  
12 randomized field trial, Odisha, India. *Bulletin of the World Health Organization, 99*(11), 762-  
13 772A. doi: 10.2471/BLT.21.285915  
14  
15  
16  
17  
18  
19  
20  
21  
22  
23  
24  
25  
26  
27  
28  
29  
30  
31  
32  
33  
34  
35  
36  
37  
38  
39  
40  
41  
42  
43  
44  
45  
46  
47  
48  
49  
50  
51  
52  
53  
54  
55  
56  
57  
58  
59  
60

Appendix Table 1. Regression coefficients from models predicting midline hemoglobin as a function of treatment assignment, exposure to three intervention components, and control variables

|                                 | Model 1  | Model 2  | Model 3  | Model 4  | Model 5  |
|---------------------------------|----------|----------|----------|----------|----------|
| RANI Intervention Overall       | 0.12     | 0.14     | 0.11     | 0.10     | 0.07     |
| Group education sessions        |          |          |          |          |          |
| 1 (vs. 0)                       |          | 0.11     |          |          | 0.11     |
| 2 (vs. 0)                       |          | 0.19     |          |          | 0.17     |
| 3 (vs. 0)                       |          | 0.14     |          |          | 0.08     |
| 4 (vs. 0)                       |          | -0.04    |          |          | -0.11    |
| 5 (vs. 0)                       |          | -0.03    |          |          | -0.10    |
| 6 (vs. 0)                       |          | -0.12    |          |          | -0.19    |
| 7 (vs. 0)                       |          | -0.03    |          |          | -0.03    |
| 8 (vs. 0)                       |          | 0.08     |          |          | 0.06     |
| 9 (vs. 0)                       |          | -0.08    |          |          | -0.09    |
| 10 (vs. 0)                      |          | 0.04     |          |          | 0.03     |
| 11 (vs. 0)                      |          | -0.15    |          |          | -0.20    |
| Anemia testing                  |          |          |          |          |          |
| 1 (vs. 0)                       |          |          | 0.11     |          | 0.12     |
| 2 (vs. 0)                       |          |          | -0.13    |          | -0.14    |
| 3 (vs. 0)                       |          |          | -0.29    |          | -0.31    |
| 4+ (vs. 0)                      |          |          | -0.19    |          | -0.17    |
| RANI Comm videos                |          |          |          |          |          |
| 1 (vs. 0)                       |          |          |          | 0.18     | 0.18     |
| 2 (vs. 0)                       |          |          |          | -0.09    | -0.04    |
| 3 (vs. 0)                       |          |          |          | -0.02    | 0.08     |
| 4+ (vs. 0)                      |          |          |          | 0.05     | 0.20     |
| Control Variables               |          |          |          |          |          |
| Age                             | -0.00    | -0.00    | -0.00    | -0.00    | -0.00    |
| Education                       | 0.02     | 0.01     | 0.02*    | 0.02     | 0.02     |
| Breastfeeding                   | -0.16**  | -0.16*   | -0.16**  | -0.16**  | -0.16**  |
| Number of children              | -0.02    | -0.02    | -0.02    | -0.02    | -0.02    |
| Caste/Tribe                     | -0.39*** | -0.39*** | -0.39*** | -0.39*** | -0.39*** |
| Knows anemia status at baseline | -0.00    | -0.00    | -0.00    | -0.00    | -0.00    |
| Baseline IFA use                | -0.39**  | -0.40**  | -0.40**  | -0.39**  | -0.40**  |
| Non-RANI intervention exposure  | 0.15     | 0.13     | 0.15     | 0.15     | 0.12     |
| R2                              | 0.03     | 0.04     | 0.04     | 0.04     | 0.04     |

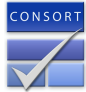

## CONSORT 2010 checklist of information to include when reporting a randomised trial\*

| Section/Topic             | Item No | Checklist item                                                                                                                        | Reported on page No                               |
|---------------------------|---------|---------------------------------------------------------------------------------------------------------------------------------------|---------------------------------------------------|
| <b>Title and abstract</b> |         |                                                                                                                                       |                                                   |
|                           | 1a      | Identification as a randomised trial in the title                                                                                     | 1                                                 |
|                           | 1b      | Structured summary of trial design, methods, results, and conclusions (for specific guidance see CONSORT for abstracts)               | 1-2                                               |
| <b>Introduction</b>       |         |                                                                                                                                       |                                                   |
| Background and objectives | 2a      | Scientific background and explanation of rationale                                                                                    | 2-3                                               |
|                           | 2b      | Specific objectives or hypotheses                                                                                                     | 3-4                                               |
| <b>Methods</b>            |         |                                                                                                                                       |                                                   |
| Trial design              | 3a      | Description of trial design (such as parallel, factorial) including allocation ratio                                                  | 6-7                                               |
|                           | 3b      | Important changes to methods after trial commencement (such as eligibility criteria), with reasons                                    | n/a                                               |
| Participants              | 4a      | Eligibility criteria for participants                                                                                                 | 7-8                                               |
|                           | 4b      | Settings and locations where the data were collected                                                                                  | 4                                                 |
| Interventions             | 5       | The interventions for each group with sufficient details to allow replication, including how and when they were actually administered | reported in protocol paper which is cited in text |
| Outcomes                  | 6a      | Completely defined pre-specified primary and secondary outcome measures, including how and when they were assessed                    | 8-9                                               |
|                           | 6b      | Any changes to trial outcomes after the trial commenced, with reasons                                                                 | n/a                                               |
| Sample size               | 7a      | How sample size was determined                                                                                                        | reported in protocol paper which is cited in text |
|                           | 7b      | When applicable, explanation of any interim analyses and stopping guidelines                                                          | n/a                                               |
| <b>Randomisation:</b>     |         |                                                                                                                                       |                                                   |
| Sequence generation       | 8a      | Method used to generate the random allocation sequence                                                                                | 6-7                                               |
|                           | 8b      | Type of randomisation; details of any restriction (such as blocking and block size)                                                   | 6-7                                               |
| Allocation                | 9       | Mechanism used to implement the random allocation sequence (such as sequentially numbered containers),                                | 6-7                                               |

|    |                                                      |     |                                                                                                                                                   |                                                   |
|----|------------------------------------------------------|-----|---------------------------------------------------------------------------------------------------------------------------------------------------|---------------------------------------------------|
| 1  | concealment                                          |     | describing any steps taken to conceal the sequence until interventions were assigned                                                              |                                                   |
| 2  | mechanism                                            |     |                                                                                                                                                   |                                                   |
| 3  | Implementation                                       | 10  | Who generated the random allocation sequence, who enrolled participants, and who assigned participants to interventions                           | reported in protocol paper which is cited in text |
| 4  |                                                      |     |                                                                                                                                                   |                                                   |
| 5  |                                                      |     |                                                                                                                                                   |                                                   |
| 6  |                                                      |     |                                                                                                                                                   |                                                   |
| 7  |                                                      |     |                                                                                                                                                   |                                                   |
| 8  | Blinding                                             | 11a | If done, who was blinded after assignment to interventions (for example, participants, care providers, those assessing outcomes) and how          | reported in protocol paper which is cited in text |
| 9  |                                                      |     |                                                                                                                                                   |                                                   |
| 10 |                                                      |     |                                                                                                                                                   |                                                   |
| 11 |                                                      |     |                                                                                                                                                   |                                                   |
| 12 |                                                      |     |                                                                                                                                                   |                                                   |
| 13 |                                                      | 11b | If relevant, description of the similarity of interventions                                                                                       | reported in protocol paper which is cited in text |
| 14 |                                                      |     |                                                                                                                                                   |                                                   |
| 15 |                                                      |     |                                                                                                                                                   |                                                   |
| 16 |                                                      |     |                                                                                                                                                   |                                                   |
| 17 |                                                      |     |                                                                                                                                                   |                                                   |
| 18 | Statistical methods                                  | 12a | Statistical methods used to compare groups for primary and secondary outcomes                                                                     | 10-11                                             |
| 19 |                                                      | 12b | Methods for additional analyses, such as subgroup analyses and adjusted analyses                                                                  | 10-11                                             |
| 20 |                                                      |     |                                                                                                                                                   |                                                   |
| 21 | <b>Results</b>                                       |     |                                                                                                                                                   |                                                   |
| 22 | Participant flow (a diagram is strongly recommended) | 13a | For each group, the numbers of participants who were randomly assigned, received intended treatment, and were analysed for the primary outcome    | 26                                                |
| 23 |                                                      | 13b | For each group, losses and exclusions after randomisation, together with reasons                                                                  | 26                                                |
| 24 |                                                      |     |                                                                                                                                                   |                                                   |
| 25 | Recruitment                                          | 14a | Dates defining the periods of recruitment and follow-up                                                                                           | reported in protocol paper which is cited in text |
| 26 |                                                      |     |                                                                                                                                                   |                                                   |
| 27 |                                                      |     |                                                                                                                                                   |                                                   |
| 28 |                                                      |     |                                                                                                                                                   |                                                   |
| 29 |                                                      |     |                                                                                                                                                   |                                                   |
| 30 |                                                      |     |                                                                                                                                                   |                                                   |
| 31 |                                                      | 14b | Why the trial ended or was stopped                                                                                                                | n/a                                               |
| 32 | Baseline data                                        | 15  | A table showing baseline demographic and clinical characteristics for each group                                                                  | 21                                                |
| 33 | Numbers analysed                                     | 16  | For each group, number of participants (denominator) included in each analysis and whether the analysis was by original assigned groups           | 21                                                |
| 34 |                                                      |     |                                                                                                                                                   |                                                   |
| 35 |                                                      |     |                                                                                                                                                   |                                                   |
| 36 | Outcomes and estimation                              | 17a | For each primary and secondary outcome, results for each group, and the estimated effect size and its precision (such as 95% confidence interval) | 11-13; 21-23                                      |
| 37 |                                                      | 17b | For binary outcomes, presentation of both absolute and relative effect sizes is recommended                                                       | 11-13; 21-23                                      |
| 38 |                                                      |     |                                                                                                                                                   |                                                   |
| 39 | Ancillary analyses                                   | 18  | Results of any other analyses performed, including subgroup analyses and adjusted analyses, distinguishing pre-specified from exploratory         | 11-13; 21-23                                      |
| 40 |                                                      |     |                                                                                                                                                   |                                                   |
| 41 |                                                      |     |                                                                                                                                                   |                                                   |
| 42 |                                                      |     |                                                                                                                                                   |                                                   |

|   |                          |    |                                                                                                                  |       |
|---|--------------------------|----|------------------------------------------------------------------------------------------------------------------|-------|
| 1 | Harms                    | 19 | All important harms or unintended effects in each group (for specific guidance see CONSORT for harms)            | n/a   |
| 2 | <b>Discussion</b>        |    |                                                                                                                  |       |
| 3 | Limitations              | 20 | Trial limitations, addressing sources of potential bias, imprecision, and, if relevant, multiplicity of analyses | 17    |
| 4 | Generalisability         | 21 | Generalisability (external validity, applicability) of the trial findings                                        | 14-17 |
| 5 | Interpretation           | 22 | Interpretation consistent with results, balancing benefits and harms, and considering other relevant evidence    | 13-17 |
| 6 | <b>Other information</b> |    |                                                                                                                  |       |
| 7 | Registration             | 23 | Registration number and name of trial registry                                                                   | 2     |
| 8 | Protocol                 | 24 | Where the full trial protocol can be accessed, if available                                                      | 6     |
| 9 | Funding                  | 25 | Sources of funding and other support (such as supply of drugs), role of funders                                  | 2     |

14 \*We strongly recommend reading this statement in conjunction with the CONSORT 2010 Explanation and Elaboration for important clarifications on all the items. If relevant, we also  
 15 recommend reading CONSORT extensions for cluster randomised trials, non-inferiority and equivalence trials, non-pharmacological treatments, herbal interventions, and pragmatic trials.  
 16 Additional extensions are forthcoming: for those and for up to date references relevant to this checklist, see [www.consort-statement.org](http://www.consort-statement.org).

# BMJ Open

## How does a social norms-based intervention affect behavior change? Interim Findings from a cluster randomized controlled trial in Odisha, India

|                                 |                                                                                                                                                                                                                                                                                                                                                                                                                                                                                 |
|---------------------------------|---------------------------------------------------------------------------------------------------------------------------------------------------------------------------------------------------------------------------------------------------------------------------------------------------------------------------------------------------------------------------------------------------------------------------------------------------------------------------------|
| Journal:                        | <i>BMJ Open</i>                                                                                                                                                                                                                                                                                                                                                                                                                                                                 |
| Manuscript ID                   | bmjopen-2021-053152.R2                                                                                                                                                                                                                                                                                                                                                                                                                                                          |
| Article Type:                   | Original research                                                                                                                                                                                                                                                                                                                                                                                                                                                               |
| Date Submitted by the Author:   | 16-Jun-2022                                                                                                                                                                                                                                                                                                                                                                                                                                                                     |
| Complete List of Authors:       | Sedlander, Erica; University of California San Francisco<br>Pant, Ichhya; George Washington University School of Public Health and Health Services<br>Bingenheimer, Jeffrey ; George Washington University Department of Health Policy<br>Yilma, Hagere; Boston University<br>Patro, Lipika; IPE Consulting<br>Mohanty, Satya; DCOR Consulting<br>Ganjoo, Rohini; The George Washington University<br>Rimal , Rajiv; Johns Hopkins University Bloomberg School of Public Health |
| <b>Primary Subject Heading</b>: | Global health                                                                                                                                                                                                                                                                                                                                                                                                                                                                   |
| Secondary Subject Heading:      | Public health, Evidence based practice                                                                                                                                                                                                                                                                                                                                                                                                                                          |
| Keywords:                       | PUBLIC HEALTH, NUTRITION & DIETETICS, Public health < INFECTIOUS DISEASES                                                                                                                                                                                                                                                                                                                                                                                                       |
|                                 |                                                                                                                                                                                                                                                                                                                                                                                                                                                                                 |

SCHOLARONE™  
Manuscripts

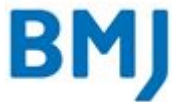

I, the Submitting Author has the right to grant and does grant on behalf of all authors of the Work (as defined in the below author licence), an exclusive licence and/or a non-exclusive licence for contributions from authors who are: i) UK Crown employees; ii) where BMJ has agreed a CC-BY licence shall apply, and/or iii) in accordance with the terms applicable for US Federal Government officers or employees acting as part of their official duties; on a worldwide, perpetual, irrevocable, royalty-free basis to BMJ Publishing Group Ltd ("BMJ") its licensees and where the relevant Journal is co-owned by BMJ to the co-owners of the Journal, to publish the Work in this journal and any other BMJ products and to exploit all rights, as set out in our [licence](#).

The Submitting Author accepts and understands that any supply made under these terms is made by BMJ to the Submitting Author unless you are acting as an employee on behalf of your employer or a postgraduate student of an affiliated institution which is paying any applicable article publishing charge ("APC") for Open Access articles. Where the Submitting Author wishes to make the Work available on an Open Access basis (and intends to pay the relevant APC), the terms of reuse of such Open Access shall be governed by a Creative Commons licence – details of these licences and which [Creative Commons](#) licence will apply to this Work are set out in our licence referred to above.

Other than as permitted in any relevant BMJ Author's Self Archiving Policies, I confirm this Work has not been accepted for publication elsewhere, is not being considered for publication elsewhere and does not duplicate material already published. I confirm all authors consent to publication of this Work and authorise the granting of this licence.

1  
2  
3 Title: How does a social norms-based intervention affect behavior change? Interim findings from a cluster randomized controlled trial  
4 in Odisha, India  
5  
6  
7

8  
9 Authors: Erica Sedlander, DrPH, MPH<sup>1</sup>, Ichhya Pant, MPH<sup>2</sup>, Jeffrey Bart Bingenheimer, PhD,<sup>2</sup> Hagere Yilma, PhD, MPH<sup>3</sup>, Lipika  
10 Patro,<sup>4</sup> Satya Mohanty, MS,<sup>5</sup> Rohini Ganjoo, PhD<sup>6</sup>, Rajiv N. Rimal, PhD<sup>2, 7</sup>  
11  
12  
13

14  
15 <sup>1</sup> The University of California San Francisco, Department of Social and Behavioral Sciences, Institute for Health and Aging

16 <sup>2</sup>The George Washington University, Milken Institute School of Public Health, Department of Prevention and Community Health

17 <sup>3</sup>Boston University, Sargent College, Department of Health Sciences

18 <sup>4</sup> IPE Global Limited

19 <sup>5</sup> DCOR Consulting

20 <sup>6</sup> The George Washington University, School of Medicine and Health Sciences, Department of Integrated Health Sciences

21 <sup>7</sup>Johns Hopkins University, Department of Health Behavior and Society  
22  
23  
24  
25

26 Erica Sedlander: (corresponding author)

27 University of California San Francisco, Department of Social and Behavioral Sciences, Institute for Health and Aging

28 esedlander@gwmail.gwu.edu  
29  
30

31 Erica Sedlander: esedlander@gwmail.gwu.edu

32 Ichhya Pant: [ipant@email.gwu.edu](mailto:ipant@email.gwu.edu)

33 Jeffrey Bart Bingenheimer: [bartbing@gwu.edu](mailto:bartbing@gwu.edu)

34 Hagere Yilma [hyilma@gwmail.gwu.edu](mailto:hyilma@gwmail.gwu.edu)

35 Lipika Patro: [lipika.patro@ipeckd.org](mailto:lipika.patro@ipeckd.org)

36 Satya Mohanty: [satya.dcor@gmail.com](mailto:satya.dcor@gmail.com)

37 Rohini Ganjoo: [rganjoo@email.gwu.edu](mailto:rganjoo@email.gwu.edu)

38 Rajiv N. Rimal: [rimal@jhu.edu](mailto:rimal@jhu.edu)  
39  
40  
41  
42  
43  
44  
45  
46  
47



1  
2  
3 Title: How does a social norms-based intervention affect behavior change? Interim findings from a cluster randomized controlled trial  
4  
5 in Odisha, India  
6  
7

## 8 **Abstract**

9  
10  
11 Background: Behavior change interventions targeting social norms are burgeoning, but researchers have little guidance on what they  
12  
13 look like, and which components affect behavior change. The Reduction in Anemia through Normative Innovations (RANI) project  
14  
15 designed an intervention to increase iron folic acid consumption in Odisha, India.  
16  
17

18 Objective: This paper examines the effect of the intervention at midline to understand which components of the RANI intervention  
19  
20 affect uptake.  
21  
22

23 Methods: Using a cluster randomized controlled design, we collected baseline data and midline data six months later from women of  
24  
25 reproductive age in the control and treatment arms (n = 3,800) in Angul, Odisha, India. Using nested models, we analyzed data from  
26  
27 three different intervention components, monthly community-based testing for anemia, participatory group education sessions, and  
28  
29 videos, to determine the extent to which exposure to each of these components accounted for the overall intervention effect on  
30  
31 hemoglobin and self-reported IFA use.  
32  
33

34 Results: Overall, residing in a treatment as opposed to control village had little effect on midline hemoglobin, but increased the odds  
35  
36 of taking supplements by 17 times. Exposure to each of the intervention components had a dose-response relationship with self-  
37  
38  
39  
40  
41  
42  
43  
44  
45  
46  
47

1  
2  
3 reported IFA use. These components, separately and together, accounted for most of the overall effect of treatment assignment on IFA  
4  
5 use.  
6

7  
8 Conclusions: All intervention components increased iron supplement use to differing degrees of magnitude. It appears that a social  
9  
10 norms-based approach can result in improving iron folic acid uptake, though improvements in hemoglobin counts were not yet  
11  
12 discernible.  
13

14  
15  
16 Keywords: social norms, behavior change, intervention, anemia  
17  
18

19  
20 Strengths and limitations of this study  
21

- 22 • The intervention is based on formative research, theory, and co-designed with input from community stakeholders
- 23 • Data comes from a large, blinded cluster-randomized controlled trial
- 24 • Intervention components are qualitatively described and then quantitatively evaluated to decipher their individual effect on
- 25 iron supplement use
- 26 • We rely on self-report for iron supplement use and image recall for participation in intervention activities
- 27
- 28
- 29

## 30 **Introduction**

31

32 Social norms, defined as informal rules of behavior considered acceptable in a group or society [1], are increasingly recognized  
33  
34 as drivers of or barriers to behavior change. In a review of social norms-based interventions over the last three decades, more than half  
35  
36 were published in the last decade [2]. Recent social norms interventions in low to middle income countries have focused on changing  
37  
38 harmful behaviors, such as intimate partner violence [3-4], female genital cutting [5], and child marriage [6]. Past research shows that  
39  
40  
41  
42  
43  
44

1  
2  
3 people are more likely to engage in a behavior when they believe many others also do so, and when there is a social expectation that  
4 they themselves should comply. In the anemia prevention context recent literature indicates a seemingly simple behavior, e.g., taking a  
5 weekly iron supplement, is embedded in social and cultural dynamics that dictate which health behaviors are appropriate [7-8].  
6  
7

8  
9  
10 The theory of normative social behavior (TNSB) highlights the critical role that social norms can play in influencing health  
11 behaviors and the circumstances under which they may do so [9-10]. According to the TNSB, the effects on behavior of descriptive  
12 norms (i.e., one's perceptions about others' behaviors) and injunctive norms (i.e., one's perceptions of social expectations regarding  
13 the behavior) may depend upon other factors at the individual, behavioral, and environmental level [11]. Factors that could either  
14 augment or attenuate the effect of social norms messaging on iron folic acid (IFA) use include perceptions that one is at risk of getting  
15 anemia, outcome expectations that taking IFA will result in health benefits like preventing anemia or reducing fatigue, and access to  
16 and availability of IFA. Therefore, interventions must aim to improve both social norms around a behavior along with potential  
17 moderators that may strengthen the relationship between social norms and behaviors. In a 2018 meta-analysis of social norms  
18 approaches to behavior change, Dempsey and authors found that the most effective social norms manipulations take place in one's  
19 own environment (e.g., a field trial), those that deliver messages in multiple formats, and those that target collectivist groups [12].  
20  
21  
22  
23  
24  
25  
26  
27  
28  
29  
30  
31  
32

33 Many social norms-based interventions are often complex and resource intensive. To implement them well, program planners  
34 need to understand the social context, the social norms around the behavior of interest, and barriers and facilitators at multiple levels  
35 of the socio-ecological model [13,14]. Guided by the TNSB, the Reduction in Anemia through Normative Innovations (RANI) Project  
36 conducted formative research to delineate significant facilitators to and barriers of iron folic acid consumption in Odisha, India [8].  
37  
38  
39  
40  
41  
42  
43  
44  
45  
46  
47

1  
2  
3 Findings from the formative work led to the design of the intervention, which included three components: (a) hands-on participatory  
4 learning modules conducted in small groups, (b) dissemination of short videos focusing on iron consumption norms, and (c) monthly  
5 hemoglobin testing for anemia, followed by public display of (anonymized) community results.  
6  
7

8  
9  
10 In this paper, we seek to determine which intervention components impact iron folic acid consumption six months later at  
11 midline. This knowledge allowed us to adapt the intervention implementation according to empirical findings. Since social and  
12 political realities on the ground cannot be fully predicted at the outset of any given field trial [15], we deemed this approach more  
13 preferable than simply implementing a static intervention based on *a priori* data. Thus, the primary goal of this paper is to examine the  
14 extent to which each intervention component contributed to the overall effects of the intervention. In addition, because the influence of  
15 the intervention may be different across subgroups, we also examine how susceptibility to intervention impact varied by age, caste,  
16 education, and communication activity. We hope that delineating the effects of each intervention component will provide guidance for  
17 future social norms-based intervention designs. As Davis et al. ([69], p. 2218) argue, “while the social norms approach is based in a  
18 rich theory, the theory does little to illuminate implementation details of interventions [16].”  
19  
20  
21  
22  
23  
24  
25  
26  
27  
28  
29

### 30 **Methods**

31  
32  
33 This study was approved by the George Washington University Institutional Review Board (FWA00005945), Sigma Science  
34 and Research, an independent IRB located in New Delhi, India, and the Indian Council for Medical Research’s Health Ministry’s  
35 Screening Committee.  
36  
37  
38  
39  
40  
41  
42  
43  
44  
45  
46  
47

### *Patient and Public Involvement Statement*

Key stakeholders from the community where the intervention was implemented participated in a two-day convening in Bhubaneswar, Odisha to co-design the intervention. Community health workers helped to implement the intervention and disseminate findings back to the community. Patients were not involved in the study – participants were living in the villages where the intervention took place.

### **Study Setting**

Nestled in the eastern coast of India, the state of Odisha is predominantly rural. Most residents (95%) are Hindu, with 23% belonging to specific tribes and practicing tribal culture (NFHS 2015-2016). At approximately 2.1 children per woman, the total fertility rate sits fairly low. Our focal district, Angul, one of 30 in the state of Odisha, has almost 2,000 villages with a total population of just over 1.2 million (Government of Odisha, 2019). Men's literacy rate (87%) is higher than that of women's (70%). Almost a quarter of girls (22%) marry before age 18 and around half of married women of reproductive age use modern methods of family planning [17].

### *Intervention Development*

To develop the RANI intervention, we conducted formative research that examined social norms around IFA use. Between March and May 2018, we collected data from four villages in the two adjacent blocks (administrative units below the district) where the

1  
2  
3 intervention took place (Kishorenagar and Athamalik). We conducted 16 focus groups and 21 individual interviews (n = 148),  
4 stratified by age and gender, with women of reproductive age, husbands, mothers-in-law, and key informants. To explore women's  
5 social norms within the focus groups, we used vignettes, short stories about theoretical characters that also live in a rural village in  
6 Angul, India [18]. Vignettes can also help uncover if social sanctions exist and unpack existing social norms. Four researchers, two  
7 from India and two from the United States, analyzed transcripts using NVivo v.12 to identify barriers and facilitators to IFA use.  
8  
9

10  
11 We found that social norms and available services varied substantially for pregnant women, non-pregnant women, and  
12 adolescents. Specifically, we found that most participants believed only pregnant women and adolescents in school consume IFA  
13 (descriptive norms). Participants also stated that only pregnant women and those diagnosed with anemia should be taking IFA  
14 regularly (injunctive norms) and we found that frontline health workers only distributed IFA to pregnant women. Adolescents enrolled  
15 in school can also obtain them weekly [8].  
16  
17

18  
19 Non-pregnant women (our sample for this paper) were not receiving IFA from frontline health workers. Indeed, barriers faced by  
20 non-pregnant women were significant: they needed to visit a health center, get tested for anemia, and then obtain the IFA if they were  
21 diagnosed as anemic. We also found that risk perception was low, with most participants believing that only "a handful of women" in  
22 their community had anemia when, in reality, more than half of women are anemic. When anemia was referenced, we found that  
23 participants were primarily referring to severe anemia, not its mild or moderate forms [8].  
24  
25

26  
27 Our findings also revealed that inequitable gender norms were an upstream barrier to women's accessing and adhering to IFA  
28 supplements. Specifically, women prioritized their family's health and well-being over their own, normalized fatigue as part of a  
29  
30  
31  
32  
33  
34  
35  
36  
37  
38  
39  
40  
41  
42  
43  
44  
45  
46  
47

woman's plight, and given that they often do all of the household work while also working outside of the home, they lacked time (and often autonomy) to visit a health center on their own [19-20].

We used findings from the qualitative research, past literature on anemia reduction efforts, and the TNSB to design the RANI intervention. A three-day convening in Bhubaneswar, Odisha, was held where we invited frontline health workers from the community, anemia researchers, and program planners to co-design an effective social norms-based intervention. Finally, we used quantitative data collected at baseline to refine the intervention design. Specifically, we validated qualitative findings that very few non-pregnant women were taking IFA with a specific percentage (less than 3% of women) despite guidelines that all women should take them regularly to prevent anemia [21]. Therefore, we decided to focus more on injunctive norms messaging (that all women of reproductive age should take IFA) rather than descriptive norms messaging (that women are taking IFA) in the beginning of the intervention.

The RANI Project intervention comprises three main components, each tapping into social norms differently: participatory learning modules; RANI Comms (videos), and community hemoglobin testing. A full description of all RANI intervention activities including specifics about each component can be found in **Table 1**. All RANI project data is stored in an online data repository [22].

### **Study Design**

Data for this study report interim midterm findings from the main trial of the RANI project [23]. The RANI project uses a cluster randomized controlled trial to evaluate the efficacy of a norms-based intervention to increase IFA use and reduce anemia in Odisha, India. The RANI project selected two blocks within the Angul district in the state of Odisha. We grouped contiguous villages

1  
2  
3 in these blocks into clusters, which we then randomly assigned to either the treatment or control arm. Villages in the treatment arm  
4 were exposed to the RANI intervention, while villages in the control arm continued with “care-as-usual”. We created clusters to  
5 minimize contamination; clusters were separated by either a natural buffer (i.e., mountain or river) or a village that was neither in the  
6 treatment nor in the control arm. This process resulted in a total of 89 clusters from 239 villages. We then segmented clusters by the  
7 proportion of caste/ethnic groups (in India they are called scheduled castes and scheduled tribes) and then selected 3 per stratum, for a  
8 total of 15 clusters per arm to be included in data analysis (which comprised 81 villages).  
9

10  
11  
12 In this paper, we report results from the baseline and midterm assessment, which is a longitudinal study from both the  
13 treatment and control clusters. The response rate for the midline questionnaire was 96.2%. Interviewers visited homes up to three  
14 times and the primary reason for not taking the midline survey was not being home when the interviewers visited their house.  
15

## 16 17 18 19 20 21 22 23 24 **Participants**

25  
26 In each designated village, we first enumerated all households and then randomly selected households for data collection using  
27 proportion-to-size principles based on cluster population. From the selected home, one woman of reproductive age (between 15 and 49  
28 years old) was chosen (randomly if more than one woman was eligible in the same home). Although our sample consisted of 3,953  
29 participants, this paper restricts the sample to those who were not pregnant at the time of the midline survey ( $n = 3,800$ ). We do so  
30 because the primary dependent variable, taking iron and folic acid tablets, has been heavily promoted among pregnant women by the  
31 Government of India. Pregnant women are also enrolled in the health system, where physicians or community health workers provide  
32 free IFA. This is not the case among non-pregnant women, who have not been targeted as IFA recipients on the ground despite WHO  
33  
34  
35  
36  
37  
38  
39  
40  
41  
42  
43  
44  
45  
46  
47



1  
2  
3 and Indian government recommendations [24-25]. The demographic profile of participants included in our analysis is shown in Table  
4  
5  
6 2.

### 7 8 **Procedure**

9  
10 The baseline data was collected in September 2019 and midline data was collected six months later in February 2020. Local data  
11  
12 collectors obtained informed consent from all individual participants included in the study in the local language, Odiya. Participants  
13  
14 under the age of 18 were required to obtain the written permission of one parent or legal guardian. Data collectors orally administered  
15  
16 a one-on-one survey to all participants, which assessed demographic information, psychosocial factors, and anemia-related behaviors.  
17  
18  
19

### 20 21 **Inclusion Criteria**

22  
23 Women were eligible for inclusion in the study if they were between the ages of 15 and 49, spoke Odiya, lived in the data  
24  
25 collection villages (either treatment or control), and did not plan to move in the next year (as this is a longitudinal study).  
26

### 27 28 **Measures**

29  
30 **Dependent Variables.** The RANI study was evaluating the efficacy of a norms-based intervention to increase IFA use and  
31  
32 reduce anemia. Therefore, our study has two dependent variables: self-reported IFA use and objectively measured serum hemoglobin  
33  
34 levels. We measured *IFA use at midline* using the interview question, “Have you ever eaten/taken an iron tablet or syrup.” (The  
35  
36 interviewer then held up the packet of IFA tablets for the interviewee to see). We coded this as a dichotomous variable, scored 1 if  
37  
38 currently taking and 0 if not or did in the past but stopped now. We obtained *hemoglobin levels* from all participants at midline  
39  
40  
41  
42  
43  
44  
45  
46  
47

1  
2  
3 through point-of-care hemoglobin tests using a HemoCue photometer (in line with India's National Family Health Survey  
4 methodology). This instrument provides hemoglobin levels immediately and accurately [26].  
5  
6

7 **Independent Variables (Exposure to the Intervention).** We examined four independent variables. The first is a dichotomous  
8 indicator of *treatment assignment* that takes the value 1 for participants residing in intervention villages and 0 for those residing in  
9 control villages. The other three independent variables are participants' self-reports of exposure to different components of the RANI  
10 intervention. To measure *exposure to the participatory learning modules*, we took the sum of responses to six questions about how  
11 often participants had seen materials from these sessions. We used visual images from the sessions, with higher scores indicating more  
12 exposure or more frequent exposure (not seen = 0, seen once or twice = 1, and seen more than twice = 2). Each image came from a  
13 different participatory learning module. One question asked whether or not they had participated in any of the games that were also a  
14 part of the RANI participatory group sessions (scored as No=0 and Yes=1). The total number corresponds to the number of times  
15 participants report having seen a particular image from any of the group sessions, with this being a proxy for the intensity of exposure  
16 to group participatory sessions. Less than 1% of participants ( $n=28$ ) marked "don't know" (which was coded as missing). We coded  
17 exposure to participatory learning sessions as a continuous variable (range 0-11). We assessed participants' *own anemia testing*  
18 (exposure to the anemia testing component of the intervention) with the question, "How many times have you been tested for anemia  
19 as part of the RANI intervention in the last six months?" Response options ranged from 0 (never) to 4 (more than 3 times). We also  
20 coded testing for anemia as a continuous variable (range 0-4). We measured *exposure to the RANI Comm videos* as the sum of  
21 responses to four questions about which of the four videos they had watched. Interviewers shared an image from each video and a  
22  
23  
24  
25  
26  
27  
28  
29  
30  
31  
32  
33  
34  
35  
36  
37  
38  
39  
40  
41  
42  
43  
44  
45  
46  
47

1  
2  
3 brief description of the story plot. Responses were treated as a continuous variable and summed across the four videos for a range  
4  
5 from 0 to 4.  
6

7 **Control Variables.** We asked respondents their *age*, highest completed level of *education*, and whether they belonged to a *scheduled*  
8 *tribe*. *IFA use at baseline* was assessed exactly as described above for midline. We asked respondents about the *number of children*  
9 they had and whether or not they were *breastfeeding*. Additionally, to understand if participants had been exposed to another  
10 intervention that was not affiliated with RANI (to avoid contamination), we asked participants, “Did you hear anything about nutrition  
11 or iron tablets from the Swabhimaan or any other program?” We coded this as a dichotomous variable (No or don’t know = 0 and Yes  
12 = 1).  
13  
14  
15  
16  
17  
18  
19  
20

## 21 **Statistical Analysis**

22 We conducted our analyses in three steps. First, we calculated frequencies and descriptive statistics of all key analytic variables  
23 by treatment and control arm and obtained p-values testing the null hypothesis of no difference between the two arms via linear and  
24 logistic regression for continuous and categorical variables, respectively. These analyses covered several socioeconomic and health-  
25 related background variables; amount of exposure to each of the three intervention components between baseline and midline; and  
26 hemoglobin levels and self-reported IFA use at midline. The latter provided unadjusted intention-to-treat estimates of the overall  
27 RANI treatment effect on these primary endpoints at midline.  
28  
29  
30  
31  
32  
33  
34  
35  
36

37 Second, we ran linear regressions to examine if exposure to each intervention component varied by select sociodemographic  
38 factors: age (32 years or older versus below 32 years old – the halfway point between the age range), belonging to a schedule caste or  
39  
40  
41  
42  
43  
44  
45  
46  
47

1  
2  
3 not, and education (completed primary school or not). These analyses were limited to residents of clusters assigned to the RANI  
4  
5 intervention arm.  
6  
7

8 Third, we ran a series of regression models to examine how each intervention component individually and additively affected  
9  
10 hemoglobin levels (linear) and IFA use (logistic) at midline and accounted for the overall effect of treatment assignment. For each  
11  
12 outcome, Model 1 includes only control variables (age, education, currently breastfeeding, number of children, whether they belong to  
13  
14 a scheduled caste or tribe, knowing anemia status at baseline, IFA use at baseline, and whether the participant reported exposure to a  
15  
16 non-RANI intervention) and RANI treatment assignment. The coefficients on RANI treatment assignment in these models represent  
17  
18 adjusted intention-to-treat estimates for each outcome. In Model 2, we add a set of dummy variables representing levels of exposure to  
19  
20 the first RANI intervention component, group education sessions, with zero sessions as the reference category. The dummy variable  
21  
22 specification provides flexibility in the nature of the relationship between number of group education sessions attended and the two  
23  
24 outcome variables. The coefficients on the dummy variables in this model represent how midline hemoglobin and self-reported IFA  
25  
26 use vary in relation to number of group education sessions attended. Moreover, comparison of the coefficient on the RANI treatment  
27  
28 assignment variable in this model to the analogous coefficient in Model 1 provides insight into the extent to which group education  
29  
30 sessions contributed to the overall effect of RANI. The next two models are similar to Model 2 but using hemoglobin testing (Model  
31  
32 3) and viewing of RANI Comm videos (Model 4) instead of group education session attendance. Finally, Model 5 includes all three  
33  
34 intervention components. The coefficients on the intervention component dummy variables in this model provide some insight into the  
35  
36 unique contribution of each component, independent of the other two. And comparison of the coefficient on the RANI treatment  
37  
38  
39  
40  
41  
42  
43  
44  
45  
46  
47

1  
2  
3 assignment dummy variable in this model to the corresponding coefficient from Model 1 represents the extent to which the three  
4  
5 intervention components jointly contributed to the overall RANI intervention effect. We used Stata version 16 to conduct all analyses,  
6  
7 with Huber-White clustered standard errors [27] to account for the sampling and cluster randomization design.  
8  
9

## 10 **Results**

11  
12 Description of the sample included in our study is shown in Panel A of Table 2. Average age was 31 years old and between a  
13  
14 quarter and a third of participants were a part of the tribal population. On average, participants completed primary school (6 years of  
15  
16 education). Participants in both treatment and control arms had on average more than one child and fewer than two. About 21% of  
17  
18 women in both arms were currently breastfeeding. The only statistically significant difference between the treatment and control arms  
19  
20 was age. Women in the treatment arm were 31 years old versus 30 years old in the control arm ( $p < .05$ ). All other demographics were  
21  
22 not statistically different by treatment and control. Panel B of Table 2 shows that exposure to non-RANI interventions was low in both  
23  
24 study arms.  
25  
26  
27

28  
29 Crude estimates of the effects of the RANI intervention at midline are shown in Panel C of Table 2. Participants from the  
30  
31 treatment arm reported more IFA use at midline (32%) compared to the control arm (3%) ( $p = < .001$ ). However, hemoglobin levels  
32  
33 were not statistically different in the two arms (11.7% versus 11.5%) ( $p = .28$ ) (see Appendix Table 1). Panel D of Table 2 shows that  
34  
35 exposure to each of the intervention components was widespread among participants in the treatment arm and low among participants  
36  
37 in the control arm. Specifically, 88% of participants in the treatment arm compared to only 12% in the control arm reported that they  
38  
39 attended at least one group educational session ( $p = < .001$ ). Over eighty percent of participants in the treatment arm reported that they  
40  
41  
42  
43  
44  
45  
46  
47

1  
2  
3 had been tested at least once as part of the intervention compared to 0% in the control arm ( $p = <.001$ ). Similarly, 80% of women in  
4  
5 the treatment arm reported that they watched one or more RANI Comm videos, compared to less than 1% in the control arm ( $p =$   
6  
7  $<.001$ ). Lastly, exposure to interventions other than RANI was minimal across both the treatment and control arms (Panel B, 1.2% and  
8  
9 2.1%, respectively).  
10

11  
12 Table 3 shows that less educated women attended more educational sessions (4.77 compared to 4.46;  $p = <.05$ ) but more  
13  
14 educated women had a higher average number of anemia tests (1.32 compared to 1.22;  $p = <.05$ ). Table 3 also shows that neither age  
15  
16 nor caste or tribal background was associated with exposure to the intervention.  
17  
18

19  
20 As there was no crude difference between the treatment and control arms in hemoglobin level at midline (see Panel C of Table  
21  
22 2), we included the analyses linking exposure to specific intervention components to hemoglobin levels as an appendix (See Appendix  
23  
24 Table 1). However, nested logistic regression models predicting self-reported IFA use as a function of study arm and exposure to each  
25  
26 of the intervention components are presented in Table 4. As seen in Model 1, after controlling for demographic variables and IFA use  
27  
28 at baseline, simply being in the treatment arm increased a woman's odds of taking IFA by more than 16 times (OR = 16.94;  $p = <$   
29  
30  $.001$ ). In Model 2, we added exposure to the group education sessions and found that the odds of taking IFA increased as the number  
31  
32 of sessions attended rose. Model 3 suggests that each additional test for anemia also showed an increase in the odds of taking IFA.  
33  
34 Model 4 similarly shows that for each RANI Comm video that a woman watched there was an increase in her odds of taking IFA.  
35  
36 Model 5 with all intervention components included shows that while all effect sizes drop (including the effect of RANI treatment  
37  
38  
39  
40  
41  
42  
43  
44  
45  
46  
47

1  
2  
3 assignment), each component still had a significant effect on IFA use This indicates that each component explains a unique part of the  
4  
5 variance in current use of IFA.  
6

## 7 8 **Discussion** 9

10 In this paper we present findings from the midline interim assessment of a multicomponent behavioral intervention intended to  
11 increase IFA use and decrease anemia among women of reproductive age in Odisha, India. We find strong evidence that the  
12 intervention increased the prevalence of self-reported IFA use among non-pregnant women, but no evidence of an effect of the  
13 intervention on average hemoglobin levels in that group. Self-reported exposure to all three intervention components was high among  
14 women in the treatment arm, which did not vary substantially by age or membership in a scheduled caste or tribe. However, exposure  
15 to anemia testing was higher among more educated women and exposure to group sessions was higher among less educated women.  
16 Self-reported exposure to all three intervention components was positively associated with IFA use, and these exposures accounted for  
17 most but not all the overall effect of the RANI intervention on IFA use among non-pregnant women.  
18  
19  
20  
21  
22  
23  
24  
25  
26  
27

28 Given that we saw very little difference in exposure to the intervention components by age, education or caste, it appears that  
29 the RANI Project's outreach efforts did not disproportionately favor those with higher privilege in society. Indeed, even though  
30 exposure to the intervention did not differ by tribal status or age, in our multivariate models we found some evidence that those with  
31 lesser education had higher IFA uptake. We view this finding rather optimistically, given that interventions have the potential for  
32 exacerbating existing differences in society along access and socioeconomic lines [28], as has been documented by the literature on  
33 the knowledge gap hypothesis [29-30].  
34  
35  
36  
37  
38  
39  
40  
41  
42  
43  
44  
45  
46  
47

1  
2  
3 We saw strong evidence that testing women for anemia (through finger-prick hemoglobin counts) was associated with IFA  
4 uptake: those who got tested more often were more likely to consume IFA tablets. The reasons for this are not known precisely, but  
5 we do have a few explanations. First, it could be that testing revealed to women the low hemoglobin counts, which spurred them to act  
6 to improve their scores. Our formative assessment had revealed that feeling weak was often a part of women's self-identity, with  
7 women often believing that fatigue was par for the course [19] and that this was part of the gendered norms for women [20]. We  
8 suspect that, in contrast, an objective measure of iron in the blood, observed through hemoglobin testing, quantified and thus provided  
9 precision to a phenomenon woman had come to accept as a vague notion of fatigue. We found that testing was highly demanded and  
10 motivational. Indeed, our process evaluation data indicate that, despite a high (60%) coverage rate of anemia testing for women in our  
11 intervention catchment areas, we have been unable to meet the demand for testing and repeat testing. If we were able to meet the demand,  
12 the impact of testing may have been even higher.  
13  
14  
15  
16  
17  
18  
19  
20  
21  
22  
23  
24  
25

26 A second reason why testing may have motivated women to consume IFA tablets pertains to observational learning around  
27 social norms. Due to test results being displayed publicly in the community, and most educational sessions linked the test results with  
28 IFA consumption, women likely came to link their consumption behaviors with hemoglobin readings – not only for themselves but  
29 also for what they had observed among others in their community, where hemoglobin testing was a monthly event. These events were  
30 so popular that, in some villages, the waiting list for testing ran up to 90 names (we were unable to accommodate more than 15 women  
31 per village per month, given the study design and resources). This public display of IFA testing and hemoglobin results also  
32 normalized women prioritizing their own health potentially shifting gender norms that solely focus on pregnant women's health or the  
33  
34  
35  
36  
37  
38  
39  
40  
41  
42  
43  
44  
45  
46  
47



1  
2  
3 health of the family. Although these underlying reasons are somewhat speculative, they do point to the need to study more precisely  
4 the link between testing and IFA consumption.  
5  
6

7  
8 Each educational participatory learning session that women attended significantly increased IFA use. These sessions were  
9 designed primarily to raise awareness and improve knowledge about anemia, iron-rich foods, and diet diversity. We also included  
10 discussions about gender roles, how eating order in the home disfavors women's health, and the need to remain strong to be able to  
11 take care of others. We have few reasons to believe that knowledge in these domains would directly translate into behaviors. However,  
12 a significant body of work demonstrates that knowledge about health is a necessary, though not sufficient, condition for behavior  
13 change [31 - 32] and that people often hold knowledge in abeyance, to be acted upon at the appropriate time [33]. From this  
14 perspective, it seems that educational sessions may have played an important role.  
15  
16  
17  
18  
19  
20  
21  
22

23  
24 Finally, we found that exposure to the communication videos was also significantly associated with increased IFA uptake. We  
25 suspect that the underlying reason for this finding pertains to another normative component of the intervention. The four videos we  
26 developed targeted different audiences, including adolescents, husbands, mothers-in-law, and women of reproductive age. As an  
27 explicit campaign strategy, each video was shown to each of the parties, including those who were not the explicit target audience for  
28 the particular video. This was done so that each group came to understand that the other groups were also being targeted by the  
29 intervention. So, for example, adolescent girls saw that there were videos that also addressed men and older women. Similarly, men  
30 saw that the videos targeted other men and other women. The overall strategy was to communicate the message that the entire  
31 community was engaged in the task of reducing anemia.  
32  
33  
34  
35  
36  
37  
38  
39  
40  
41  
42  
43  
44  
45  
46  
47

1  
2  
3 In this paper, we assessed how each of the intervention components affected IFA use. This helps elucidate where this  
4 intervention should focus for the remaining trial, provides a clear picture of dose response, and highlights where other social norms  
5 program implementors may want to focus their efforts. In another midline paper, we assessed the effect of social norms on IFA use  
6 and found that changes in descriptive and collective norms (but not injunctive norms) were associated with changes in self-reported  
7 IFA use [34].  
8  
9

10  
11  
12  
13  
14  
15 It is also important to discuss the lack of an effect of the RANI intervention on hemoglobin use despite an increase in self-  
16 reported IFA use. One plausible explanation of these disparate findings is that the increase in IFA use among members of the  
17 treatment arm is real but is not sufficient in magnitude or duration to produce a corresponding increase in hemoglobin levels.  
18 Alternatively, it could be attributable to differential misreporting of IFA use among treatment group members, a form of courtesy or  
19 social desirability bias. Findings from the end line data collection, planned to take place at the end of the project, may help to  
20 adjudicate between these two explanations.  
21  
22  
23  
24  
25  
26  
27

28  
29 Of course, our study is not without limitations. First and foremost, while treatment assignment is objectively measured on the  
30 basis of project administrative data, exposure to the three intervention components is self-reported and may be subject to some level of  
31 misreporting. Furthermore, it is possible that women who participate in the intervention may be more motivated to change behavior in  
32 general and are already more inclined to take IFA. Therefore, Table 4 could overstate the effects on IFA use of exposure to the  
33 intervention components, as well as the contributions of those components to the overall RANI effect. However, IFA use is still a  
34 result of participating in the RANI intervention, as participation led to IFA use so we may have simply captured women who were  
35  
36  
37  
38  
39  
40  
41  
42  
43  
44  
45  
46  
47

1  
2  
3 farther along in their readiness to change. Additionally, although our study used a representative sample of areas and women in our  
4  
5 focal areas, findings may not be generalizable outside of that setting.  
6  
7

8         Despite these limitations, our study has strengths: the intervention is based on formative research; it is co-designed by  
9  
10 stakeholders from the area; we use a theoretically driven and adaptive approach; and the study design itself is robust, with an  
11  
12 underlying randomization to experimental arms.  
13

## 14 **Conclusion**

15  
16  
17         Our findings show that a social norms-based intervention can be successful in increasing IFA use. They also demonstrate that  
18  
19 unique intervention components separately and altogether impact this success. All three components appear to contribute something to  
20  
21 the overall effect of the intervention. While all three intervention components tapped into social norms messaging, hemoglobin testing  
22  
23 provided individual health information, village level health information, a comparison to other villages, and changes in health  
24  
25 information over time. This multi-level component, coupled with the other two components, may help women reach the tipping point  
26  
27 to take and adhere to IFA. While IFA use shows promise, hemoglobin levels may need more time to show significant changes,  
28  
29 especially among non-pregnant women who were not taking IFA and who only take it weekly. End line results will elucidate more  
30  
31 information about the full RANI intervention effects.  
32  
33  
34  
35  
36  
37  
38  
39  
40  
41  
42  
43  
44  
45  
46  
47

### Trial Registration

This trial was registered with Clinical Trial Registry- India (CTRI) (CTRI/2018/10/016186) on 29 October 2018.

### Funding

This work was supported by a grant from The Bill and Melinda Gates Foundation (OPP1182519) to the George Washington University, Rajiv N. Rimal, principal investigator. The funders had no role in study design, data collection and analysis, decision to publish, or preparation of the manuscript.

### Author Contribution Statement

ES: Conceptualization, methodology, analysis, writing – original draft

IP: Conceptualization, methodology, writing – review & editing

JB: Methodology, writing – review & editing

HY: Methodology, data curation, writing – review & editing

LP: Project administration, supervision, writing – review & editing

SM: Project administration, supervision, writing – review & editing

RG: writing – review & editing

RR: Conceptualization, methodology, supervision, funding acquisition, writing – review & editing

The authors have no competing interests.

### Data sharing statement:

Data used for this study can be found in our online data repository: [GW Scholarspace \(https://scholarspace.library.gwu.edu/\)](https://scholarspace.library.gwu.edu/) and can also be requested from the first author.

**Table 1. Description of RANI intervention activities**

|                                                                                                                                                                                                                                                                                                                                                                                                                                                                                                                                                                                                                                                                                                                    |
|--------------------------------------------------------------------------------------------------------------------------------------------------------------------------------------------------------------------------------------------------------------------------------------------------------------------------------------------------------------------------------------------------------------------------------------------------------------------------------------------------------------------------------------------------------------------------------------------------------------------------------------------------------------------------------------------------------------------|
| <p><b>Group participatory learning sessions</b></p> <p>We developed ten one-hour-long group participatory learning modules on various topics related to anemia prevention, including iron folic acid supplementation, diet diversity, and social norms/gender norms that may impact a woman's ability to take iron supplements. These monthly group participatory learning sessions are delivered through in-person activities and games. Women and their social networks (e.g., husbands and mothers-in-law) were all invited to participate so that women and those important to her are being exposed to the same messaging. We covered four participatory learning modules before midline data collection.</p> |
| <p><b>RANI Comm videos</b></p> <p>We created four RANI Comm videos in the local language, Odiya, with local residents as actors. These videos highlighted the stories of women overcoming barriers related to IFA consumption and other social norms prevalent in the area. The videos were shown on smartphones and tablets to both individuals and small groups. The videos targeted various audiences (pregnant women, non-pregnant women, husbands, and mothers-in-law) and addressed barriers and facilitators to IFA use that we identified in the formative research</p>                                                                                                                                    |

1  
2  
3 followed by group discussion sessions. Descriptive and injunctive norms messages around IFA  
4  
5 consumption were included in each storyline. An example of injunctive norms messaging in  
6  
7 the storyline is a mother-in-law expressing that her daughter-in-law should be taking care of  
8  
9 herself too, not just looking after the family, and should be taking weekly IFA to avoid anemia  
10  
11 even if she is not pregnant. A new video was rolled out every 2-3 months. The viewing time  
12  
13 for one video was approximately 15 minutes. Even though videos were 3-4 minutes long, the  
14  
15 pre and post viewing discussion took an additional 10 minutes. Participants could have seen  
16  
17 the same video more than once.  
18  
19  
20

### 21 22 **Community based hemoglobin testing**

23  
24 We also conducted monthly anemia testing of the women using a digital Hemocue meter.  
25  
26 These instant results are shared at the individual, group, and village levels with the help of  
27  
28 blood shaped cards (different colors indicating anemia severity) and infographics appropriate  
29  
30 for a low literacy population. Monthly community-based testing was followed by a discussion  
31  
32 about trends in anemia and village-level comparisons (based on the hemoglobin readings) with  
33  
34 neighboring communities at both the individual and community levels. This provides ipsative  
35  
36 feedback (information people receive about their ongoing progress over time), normative  
37  
38  
39  
40  
41  
42  
43  
44  
45  
46  
47

1  
2  
3 feedback (information about the particular individual's achievements relative to those of her  
4 social peer), and aspirational feedback (comparisons people make between their current state  
5 of affairs and the goals they may have set for themselves). Testing sessions lasted for an hour  
6 as community/group testing was followed up by demonstration of results and behavioral  
7 nudges for improving their Hb count.  
8  
9  
10  
11  
12  
13

14  
15 \* Community Facilitators of the RANI team delivered the intervention. However, IFA tablets were provided by the community health  
16 workers. RANI started off using key influencers in the village like front line health workers to gather people for the intervention.  
17  
18 However, as our facilitators became familiar with the community, we also accepted RANI volunteers (women from the community)  
19  
20 who facilitated this. Some of the interventions were delivered at the household level also.  
21  
22  
23  
24  
25  
26  
27  
28  
29  
30  
31  
32  
33  
34  
35  
36  
37  
38  
39  
40  
41  
42  
43  
44  
45  
46  
47

**Table 2. Description of Participants by Study Arm**

|                                                 | Treatment<br>(n=1874) | Control<br>(n=1867) | p-value |
|-------------------------------------------------|-----------------------|---------------------|---------|
| <b>Demographic</b>                              |                       |                     |         |
| Age (years)                                     | 31.2                  | 30.5                | 0.022   |
| Part of tribal pop                              | 23.6%                 | 31.7%               | 0.267   |
| Education (years)                               | 6.07                  | 6.17                | 0.749   |
| Breastfeeding at baseline                       | 21.4%                 | 21.7%               | 0.836   |
| Number of children at baseline                  | 1.69                  | 1.68                | 0.851   |
|                                                 |                       |                     |         |
| Exposure to non-RANI interventions              | 1.2%                  | 2.1%                | 0.283   |
|                                                 |                       |                     |         |
| <b>Dependent variables</b>                      |                       |                     |         |
| IFA use at midline                              | 32.0%                 | 3.0%                | <0.001  |
| Hemoglobin at midline (g/dl)                    | 11.66                 | 11.52               | 0.281   |
|                                                 |                       |                     |         |
| <b>Exposure to RANI intervention components</b> |                       |                     |         |
| Number of group education sessions attended     | 4.60                  | 0.23                | <0.001  |
| Attended at least one group education session   | 88.6%                 | 12.1%               | <0.001  |
| Number of hemoglobin tests undergone            | 1.28                  | 0.00                | <0.001  |
| Tested for hemoglobin at least once             | 81.4%                 | 0.0%                | <0.001  |
| Number of RANI Comm videos views                | 2.46                  | 0.00                | <0.001  |
| Viewed at least one RANI Comm video             | 79.8%                 | 0.2%                | <0.001  |

*Notes:* We ran regression analyses to test the statistical significance between treatment versus control arms on demographic variables. Significant cells are in bold. The other non-RANI related intervention includes anemia related education as one component that may have had some overlap with our intervention. We included this as a control in our models to ensure that any changes in behavior are a result of our intervention alone.



1  
2  
3  
4  
5  
6  
7  
8  
9  
10  
11  
12  
13  
14  
15  
16  
17  
18  
19  
20  
21  
22  
23  
24  
25  
26  
27  
28  
29  
30  
31  
32  
33  
34  
35  
36  
37  
38  
39  
40  
41  
42  
43  
44  
45  
46  
47

**Table 3. Exposure to intervention components by age, education, and caste (treatment arm participants)**

|                          | Average number of group educational sessions attended | Average number of hemoglobin tests undergone | Average number pf RANI Comm videos seen |
|--------------------------|-------------------------------------------------------|----------------------------------------------|-----------------------------------------|
| Age                      |                                                       |                                              |                                         |
| Less than 32 years       | 4.48 (SD: 2.82)                                       | 1.33 (SD: 1.04)                              | 2.41 (SD: 1.55)                         |
| 32 years or more         | 4.74 (SD: 2.95)                                       | 1.22 (SD: 0.95)                              | 2.53 (SD: 1.55)                         |
| p-value                  | 0.219                                                 | 0.056                                        | 0.119                                   |
| Education                |                                                       |                                              |                                         |
| Up to completed primary  | 4.77 (SD: 2.88)                                       | 1.22 (0.93)                                  | 2.55 (SD: 1.55)                         |
| More than completed prim | 4.46 (SD: 2.88)                                       | 1.32 (1.05)                                  | 2.40 (SD: 1.55)                         |
| p-value                  | 0.040                                                 | 0.033                                        | 0.132                                   |
| Scheduled Tribe or Caste |                                                       |                                              |                                         |
| Yes                      | 4.54 (SD: 2.87)                                       | 1.28 (SD: 1.00)                              | 2.44 (SD: 1.56)                         |
| No                       | 4.78 (SD: 2.90)                                       | 1.29 (SD: 1.01)                              | 2.55 (SD: 1.52)                         |
| p-value                  | 0.429                                                 | 0.899                                        | 0.407                                   |

\*SD = Standard deviations

For peer review only

**Table 4. Adjusted odds ratios from logistic regression models predicting self-reported IFA use at midline as a function of treatment assignment, exposure to three intervention components, and control variables**

|                                 | Model 1  | Model 2  | Model 3  | Model 4 | Model 5 |
|---------------------------------|----------|----------|----------|---------|---------|
| RANI Intervention Overall       | 16.94*** | 5.24***  | 3.62***  | 5.16*** | 2.25*   |
| <b>Group education sessions</b> |          |          |          |         |         |
| 1 (vs. 0)                       |          | 1.50     |          |         | 1.17    |
| 2 (vs. 0)                       |          | 2.89***  |          |         | 1.71*   |
| 3 (vs. 0)                       |          | 2.94***  |          |         | 1.37    |
| 4 (vs. 0)                       |          | 3.05***  |          |         | 1.30    |
| 5 (vs. 0)                       |          | 3.80***  |          |         | 1.43    |
| 6 (vs. 0)                       |          | 5.37***  |          |         | 1.76*   |
| 7 (vs. 0)                       |          | 5.39***  |          |         | 1.39    |
| 8 (vs. 0)                       |          | 8.53***  |          |         | 2.41*   |
| 9 (vs. 0)                       |          | 8.16***  |          |         | 2.30**  |
| 10 (vs. 0)                      |          | 9.23***  |          |         | 2.23*   |
| 11 (vs. 0)                      |          | 11.97*** |          |         | 2.81**  |
| <b>Anemia testing</b>           |          |          |          |         |         |
| 1 (vs. 0)                       |          |          | 4.91***  |         | 3.07*** |
| 2 (vs. 0)                       |          |          | 6.93***  |         | 3.72*** |
| 3 (vs. 0)                       |          |          | 11.94*** |         | 5.65*** |
| 4 (vs. 0)                       |          |          | 12.91*** |         | 4.90*** |
| <b>RANI Comm videos</b>         |          |          |          |         |         |
| 1 (vs. 0)                       |          |          |          | 2.30*** | 1.44    |
| 2 (vs. 0)                       |          |          |          | 2.85*** | 1.59    |
| 3 (vs. 0)                       |          |          |          | 3.57*** | 1.72*   |
| 4 (vs. 0)                       |          |          |          | 5.66*** | 2.39*** |
| <b>Control Variables</b>        |          |          |          |         |         |
| Age                             | 0.99     | 0.99     | 1.00     | 0.99    | 0.99    |
| Education                       | 0.98     | 0.97     | 0.97     | 0.98    | 0.97    |
| Breastfeeding                   | 1.35*    | 1.37*    | 1.41*    | 1.41**  | 1.43**  |
| Number of children              | 0.99     | 0.96     | 0.96     | 0.97    | 0.95    |
| Caste/Tribe                     | 1.31*    | 1.26     | 1.31*    | 1.28    | 1.26    |

1  
2  
3  
4  
5  
6  
7  
8  
9  
10  
11  
12  
13  
14  
15  
16  
17  
18  
19  
20  
21  
22  
23  
24  
25  
26  
27  
28  
29  
30  
31  
32  
33  
34  
35  
36  
37  
38  
39  
40  
41  
42  
43  
44  
45  
46  
47

|                                 |         |         |         |         |         |
|---------------------------------|---------|---------|---------|---------|---------|
| Knows anemia status at baseline | 1.00    | 1.00    | 1.00    | 1.00    | 1.00    |
| Baseline IFA use                | 2.59*** | 2.94*** | 3.30*** | 2.87*** | 3.36*** |
| Non-RANI intervention exposure  | 1.85    | 1.28    | 1.57    | 1.59    | 1.36    |
| Pseudo R2                       | 0.20    | 0.24    | 0.24    | 0.23    | 0.26    |

Notes: \**p* < .05, \*\**p* < .01, \*\*\**p* < .00

**Ethical Approval Statement**

This study was approved by the George Washington University Institutional Review Board (FWA00005945), Sigma Science and Research, an independent IRB located in New Delhi, India, and the Indian Council for Medical Research’s Health Ministry’s Screening Committee.

For peer review only

## References

1. Reno, R. R., Cialdini, R. B., & Kallgren, C. A. (1993). The trans situational influence of social norms. *Journal of personality and social psychology*, 64(1), 104.
2. Yemin, P., Fei, M., Lahlou, S., & Levy, S. (2019). Using social norms to change behavior and increase sustainability in the real world: A systematic review of the literature. *Sustainability*, 11(20), 5847.
3. Simone Francis, Prabin Nanicha Shrestha, Binita Shrestha, Gemma Ferguson , Brian Batayeh, Monique Hennink & Cari Jo Clark (2020): The Influence of Organised Diffusion on Social Norms Change: Addressing Intimate Partner Violence in Nepal, *Global Public Health*, DOI: 10.1080/17441692.2020.1845767
4. Clark, C. J., Bergenfeld, I., Batayeh, B., Ferguson, G., Shrestha, B., & Shrestha, P. N. (2019). Intimate partner violence in Nepal: Change starts at home study, what works to prevent violence: A global programme to prevent violence against women and girls evidence brief. South Africa Medical Research Council.
5. Shell-Duncan, B., Wander, K., Hernlund, Y., & Moreau, A. (2011). Dynamics of change in the practice of female genital cutting in Senegambia: testing predictions of social convention theory. *Social science & medicine* (1982), 73(8), 1275–1283. <https://doi.org/10.1016/j.socscimed.2011.07.022>
6. Vaitla, Bapu, Alice Taylor, Julia Van Horn, and Ben Cislighi. 2017. *Social Norms and Girls' Well-Being: Linking Theory and Practice*. Washington, D.C.: Data2X.
7. Nagata, J. M., Gatti, L. R., & Barg, F. K. (2012). Social determinants of iron supplementation among women of reproductive age: a systematic review of qualitative data. *Maternal & child nutrition*, 8(1), 1-18.
8. Sedlander, E., Long, M., Mohanty, S., Munjral, A., Bingenheimer, J., Yilma, H., Rimal, R. N. (2020). Moving Beyond Individual Barriers and Identifying Multi-level Strategies to Address Anemia in Rural India. *BMC Public Health*, 20:457.
9. Rimal, R. N., Lapinski, M. K., Cook, R. J., & Real, K. (2005). Moving toward a theory of normative influences: How perceived benefits and similarity moderate the impact of descriptive norms on behaviors. *Journal of health communication*, 10(5), 433-450.
10. Rimal, R. N., & Real, K. (2005). How behaviors are influenced by perceived norms: A test of the theory of normative social behavior. *Communication research*, 32(3), 389-414.
11. Chung, A., and Rimal, R. N. (2016). Social norms: a review. *Rev. Commun. Res.* 4, 1–29. doi: 10.12840/issn.2255-4165.2016.04.01.008
12. Dempsey, R., McAlaney, J., Bewick, B. (2018). A Critical Appraisal of the Social Norms Approach as an Interventional Strategy for Health-Related Behavior and Attitude Change. *Frontiers in Psychology*, 6. <https://doi.org/10.3389/fpsyg.2018.02180>
13. Cislighi, B., Nkwi, P., Mackie, G & Shakya, H. (2020). Why context matters for social norms interventions: The case of child marriage in Cameroon, *Global Public Health*, 15:4, 532-543, DOI: 10.1080/17441692.2019.1704818
14. Edberg, M., & Krieger, L. (2020). Recontextualizing the social norms construct as applied to health promotion.. *SSM-Population Health*, 10 (). <http://dx.doi.org/10.1016/j.ssmph.2020.100560>
15. Pant, I., Patro, L., Sedlander, E., Gupta, K., Chandarana, S., Rimal, R. Monitor to Innovate with Feedback Loops: Process Evaluation Protocol for an Anemia Prevention Intervention. Study Protocol. Research Square. 10.21203/rs.3.rs-389608/v1

16. Davis, C.A.; Heiman, J.R.; Menczer, F. A Role for Network Science in Social Norms Intervention. *Procedia Comput. Sci.* 2015, 51, 2217–2226.
17. International Institute for Population Sciences (IIPS) and ICF. National family health survey (NFHS-4), India, 2015–16: Odisha. Mumbai: IIPS; 2017
18. Gourlay, A., G. Mshana, I. Birdthistle, G. Bulugu, B. Zaba, and M. Urassa. 2014. “Using vignettes in qualitative research to explore barriers and facilitating factors to the uptake of prevention of mother-to-child transmission services in rural Tanzania: A critical analysis,” *BMC Medical Research Methodology* 14(1): 21.
19. Yilma, H., Sedlander, E., Rimal, R. N., Pattnaik, S. (2020). Anemia reduction in India: exploring fatigue as a cue to seek treatment. *BMJ Global Health.* 10:e037471.
20. Sedlander, E., Ladwa, C., Talegawkar, S., Ganjoo, R., Rimal, R. N. (2021). How Gender Norms affect Anemia in Rural, Odisha India: a Qualitative Study. *Journal of Nutrition.* 111159
21. Sedlander, E. Long, M., Bingenheimer, J., Rimal, R. (2021). Examining intentions to take iron folic acid supplements to inform a behavioral intervention: The Reduction in Anemia through Normative Innovations (RANI) Project. *PLOS One.* 16(5): e0249646. <https://doi.org/10.1371/journal.pone.0249646>
22. [dataset] Long, M., Sedlander, E., Bingenheimer, J., Rimal, R. Data from Examining intentions to take iron supplements to inform a behavioral intervention: The Reduction in Anemia through Normative Innovations (RANI) Project, 2019. <https://scholarspace.library.gwu.edu/work/gx41mj67p>
23. Yilma, H., Sedlander, E., Rimal, R. N., Pant, I. Munjral, A., Mohanty, S. (2020). The Reduction in Anemia through Normative Innovations (RANI) Project: Study Protocol for a Cluster Randomized Controlled Trial in Odisha, India. *BMC Public Health,* 20(1):203.
24. World Health Organization. (2018). Weekly iron and folic acid supplementation as an anaemia-prevention strategy in women and adolescent girls: lessons learnt from implementation of programmes among non-pregnant women of reproductive age. World Health Organization. <https://apps.who.int/iris/handle/10665/274581>. Accessed February 4, 2021.
25. Intensified National Iron Plus Initiative (I-NIPI). (2018). Ministry of Health and Family Welfare, Government of India. Anemia Mukt Bharat. [https://anemiamukt Bharat.info/wp-content/uploads/2019/09/Anemia-Mukt-Bharat-Brochure\\_English.pdf](https://anemiamukt Bharat.info/wp-content/uploads/2019/09/Anemia-Mukt-Bharat-Brochure_English.pdf) Accessed February 22, 2021.
26. Sanchis-Gomar F, Cortell-Ballester J, Pareja-Galeano H, Banfi G, Lippi G. Hemoglobin point-of-care testing: the HemoCue system. *J Lab Automation.* 2012;18(3):198–205.
27. Rogers, W.H. (1993). Regression standard errors in clustered samples. *Stata Tech Bull;* 13 (Reprinted in *Stata Technical Bulletin Reprints,* 3: 88–94): 19-23.
28. Viswanath, K., & Kreuter, M. W. (2007). Health disparities, communication inequalities, and eHealth. *American journal of preventive medicine,* 32(5), S131-S133.
29. Donohue, G. A., Tichenor, P. J., & Olien, C. N. (1975). Mass media and the knowledge gap: A hypothesis reconsidered. *Communication research,* 2(1), 3-23.
30. Viswanath, K., & Finnegan Jr, J. R. (1996). The knowledge gap hypothesis: Twenty-five years later. *Annals of the International Communication Association,* 19(1), 187-228.
31. Girma, E., Gebretsadik, L. A., Kaufman, M. R., Rimal, R. N., Morankar, S. N., & Limaye, R. J. (2014). Stigma against people with HIV/AIDS in rural Ethiopia, 2005 to 2011: signs and predictors of improvement. *AIDS and Behavior,* 18(6), 1046-1053.

- 1  
2  
3 32. Rimal, R. N. (2000). Closing the knowledge-behavior gap in health promotion: The  
4 mediating role of self-efficacy. *Health communication, 12*(3), 219-237.  
5  
6 33. Rimal, R. N., Flora, J. A., & Schooler, C. (1999). Achieving improvements in overall  
7 health orientation: Effects of campaign exposure, information seeking, and health media  
8 use. *Communication Research, 26*(3), 322-348.  
9  
10 34. Rimal, R. N., Yilma, H., Sedlander, E., Mohanty, S., Patro, L., Pant, I., Khuntia, S. K., Swain,  
11 M., & Behera, S. (2021). Iron folic acid consumption and changing social norms: Cluster  
12 randomized field trial, Odisha, India. *Bulletin of the World Health Organization, 99*(11), 762-  
13 772A. doi: 10.2471/BLT.21.285915  
14  
15  
16  
17  
18  
19  
20  
21  
22  
23  
24  
25  
26  
27  
28  
29  
30  
31  
32  
33  
34  
35  
36  
37  
38  
39  
40  
41  
42  
43  
44  
45  
46  
47  
48  
49  
50  
51  
52  
53  
54  
55  
56  
57  
58  
59  
60

Appendix Table 1. Regression coefficients from models predicting midline hemoglobin as a function of treatment assignment, exposure to three intervention components, and control variables

|                                 | Model 1  | Model 2  | Model 3  | Model 4  | Model 5  |
|---------------------------------|----------|----------|----------|----------|----------|
| RANI Intervention Overall       | 0.12     | 0.14     | 0.11     | 0.10     | 0.07     |
| Group education sessions        |          |          |          |          |          |
| 1 (vs. 0)                       |          | 0.11     |          |          | 0.11     |
| 2 (vs. 0)                       |          | 0.19     |          |          | 0.17     |
| 3 (vs. 0)                       |          | 0.14     |          |          | 0.08     |
| 4 (vs. 0)                       |          | -0.04    |          |          | -0.11    |
| 5 (vs. 0)                       |          | -0.03    |          |          | -0.10    |
| 6 (vs. 0)                       |          | -0.12    |          |          | -0.19    |
| 7 (vs. 0)                       |          | -0.03    |          |          | -0.03    |
| 8 (vs. 0)                       |          | 0.08     |          |          | 0.06     |
| 9 (vs. 0)                       |          | -0.08    |          |          | -0.09    |
| 10 (vs. 0)                      |          | 0.04     |          |          | 0.03     |
| 11 (vs. 0)                      |          | -0.15    |          |          | -0.20    |
| Anemia testing                  |          |          |          |          |          |
| 1 (vs. 0)                       |          |          | 0.11     |          | 0.12     |
| 2 (vs. 0)                       |          |          | -0.13    |          | -0.14    |
| 3 (vs. 0)                       |          |          | -0.29    |          | -0.31    |
| 4+ (vs. 0)                      |          |          | -0.19    |          | -0.17    |
| RANI Comm videos                |          |          |          |          |          |
| 1 (vs. 0)                       |          |          |          | 0.18     | 0.18     |
| 2 (vs. 0)                       |          |          |          | -0.09    | -0.04    |
| 3 (vs. 0)                       |          |          |          | -0.02    | 0.08     |
| 4+ (vs. 0)                      |          |          |          | 0.05     | 0.20     |
| Control Variables               |          |          |          |          |          |
| Age                             | -0.00    | -0.00    | -0.00    | -0.00    | -0.00    |
| Education                       | 0.02     | 0.01     | 0.02*    | 0.02     | 0.02     |
| Breastfeeding                   | -0.16**  | -0.16*   | -0.16**  | -0.16**  | -0.16**  |
| Number of children              | -0.02    | -0.02    | -0.02    | -0.02    | -0.02    |
| Caste/Tribe                     | -0.39*** | -0.39*** | -0.39*** | -0.39*** | -0.39*** |
| Knows anemia status at baseline | -0.00    | -0.00    | -0.00    | -0.00    | -0.00    |
| Baseline IFA use                | -0.39**  | -0.40**  | -0.40**  | -0.39**  | -0.40**  |
| Non-RANI intervention exposure  | 0.15     | 0.13     | 0.15     | 0.15     | 0.12     |
| R2                              | 0.03     | 0.04     | 0.04     | 0.04     | 0.04     |



## CONSORT 2010 checklist of information to include when reporting a randomised trial\*

| Section/Topic             | Item No | Checklist item                                                                                                                        | Reported on page No                               |
|---------------------------|---------|---------------------------------------------------------------------------------------------------------------------------------------|---------------------------------------------------|
| <b>Title and abstract</b> |         |                                                                                                                                       |                                                   |
|                           | 1a      | Identification as a randomised trial in the title                                                                                     | 1                                                 |
|                           | 1b      | Structured summary of trial design, methods, results, and conclusions (for specific guidance see CONSORT for abstracts)               | 1-2                                               |
| <b>Introduction</b>       |         |                                                                                                                                       |                                                   |
| Background and objectives | 2a      | Scientific background and explanation of rationale                                                                                    | 2-3                                               |
|                           | 2b      | Specific objectives or hypotheses                                                                                                     | 3-4                                               |
| <b>Methods</b>            |         |                                                                                                                                       |                                                   |
| Trial design              | 3a      | Description of trial design (such as parallel, factorial) including allocation ratio                                                  | 6-7                                               |
|                           | 3b      | Important changes to methods after trial commencement (such as eligibility criteria), with reasons                                    | n/a                                               |
| Participants              | 4a      | Eligibility criteria for participants                                                                                                 | 7-8                                               |
|                           | 4b      | Settings and locations where the data were collected                                                                                  | 4                                                 |
| Interventions             | 5       | The interventions for each group with sufficient details to allow replication, including how and when they were actually administered | reported in protocol paper which is cited in text |
| Outcomes                  | 6a      | Completely defined pre-specified primary and secondary outcome measures, including how and when they were assessed                    | 8-9                                               |
|                           | 6b      | Any changes to trial outcomes after the trial commenced, with reasons                                                                 | n/a                                               |
| Sample size               | 7a      | How sample size was determined                                                                                                        | reported in protocol paper which is cited in text |
|                           | 7b      | When applicable, explanation of any interim analyses and stopping guidelines                                                          | n/a                                               |
| <b>Randomisation:</b>     |         |                                                                                                                                       |                                                   |
| Sequence generation       | 8a      | Method used to generate the random allocation sequence                                                                                | 6-7                                               |
|                           | 8b      | Type of randomisation; details of any restriction (such as blocking and block size)                                                   | 6-7                                               |
| Allocation                | 9       | Mechanism used to implement the random allocation sequence (such as sequentially numbered containers),                                | 6-7                                               |



|    |                                                      |     |                                                                                                                                                   |                                                   |
|----|------------------------------------------------------|-----|---------------------------------------------------------------------------------------------------------------------------------------------------|---------------------------------------------------|
| 1  | concealment                                          |     | describing any steps taken to conceal the sequence until interventions were assigned                                                              |                                                   |
| 2  | mechanism                                            |     |                                                                                                                                                   |                                                   |
| 3  | Implementation                                       | 10  | Who generated the random allocation sequence, who enrolled participants, and who assigned participants to interventions                           | reported in protocol paper which is cited in text |
| 4  |                                                      |     |                                                                                                                                                   |                                                   |
| 5  |                                                      |     |                                                                                                                                                   |                                                   |
| 6  |                                                      |     |                                                                                                                                                   |                                                   |
| 7  |                                                      |     |                                                                                                                                                   |                                                   |
| 8  | Blinding                                             | 11a | If done, who was blinded after assignment to interventions (for example, participants, care providers, those assessing outcomes) and how          | reported in protocol paper which is cited in text |
| 9  |                                                      |     |                                                                                                                                                   |                                                   |
| 10 |                                                      |     |                                                                                                                                                   |                                                   |
| 11 |                                                      |     |                                                                                                                                                   |                                                   |
| 12 |                                                      |     |                                                                                                                                                   |                                                   |
| 13 |                                                      | 11b | If relevant, description of the similarity of interventions                                                                                       | reported in protocol paper which is cited in text |
| 14 |                                                      |     |                                                                                                                                                   |                                                   |
| 15 |                                                      |     |                                                                                                                                                   |                                                   |
| 16 |                                                      |     |                                                                                                                                                   |                                                   |
| 17 |                                                      |     |                                                                                                                                                   |                                                   |
| 18 | Statistical methods                                  | 12a | Statistical methods used to compare groups for primary and secondary outcomes                                                                     | 10-11                                             |
| 19 |                                                      | 12b | Methods for additional analyses, such as subgroup analyses and adjusted analyses                                                                  | 10-11                                             |
| 20 |                                                      |     |                                                                                                                                                   |                                                   |
| 21 | <b>Results</b>                                       |     |                                                                                                                                                   |                                                   |
| 22 | Participant flow (a diagram is strongly recommended) | 13a | For each group, the numbers of participants who were randomly assigned, received intended treatment, and were analysed for the primary outcome    | 26                                                |
| 23 |                                                      | 13b | For each group, losses and exclusions after randomisation, together with reasons                                                                  | 26                                                |
| 24 |                                                      |     |                                                                                                                                                   |                                                   |
| 25 | Recruitment                                          | 14a | Dates defining the periods of recruitment and follow-up                                                                                           | reported in protocol paper which is cited in text |
| 26 |                                                      |     |                                                                                                                                                   |                                                   |
| 27 |                                                      |     |                                                                                                                                                   |                                                   |
| 28 |                                                      |     |                                                                                                                                                   |                                                   |
| 29 |                                                      |     |                                                                                                                                                   |                                                   |
| 30 |                                                      |     |                                                                                                                                                   |                                                   |
| 31 |                                                      | 14b | Why the trial ended or was stopped                                                                                                                | n/a                                               |
| 32 | Baseline data                                        | 15  | A table showing baseline demographic and clinical characteristics for each group                                                                  | 21                                                |
| 33 | Numbers analysed                                     | 16  | For each group, number of participants (denominator) included in each analysis and whether the analysis was by original assigned groups           | 21                                                |
| 34 |                                                      |     |                                                                                                                                                   |                                                   |
| 35 |                                                      |     |                                                                                                                                                   |                                                   |
| 36 | Outcomes and estimation                              | 17a | For each primary and secondary outcome, results for each group, and the estimated effect size and its precision (such as 95% confidence interval) | 11-13; 21-23                                      |
| 37 |                                                      | 17b | For binary outcomes, presentation of both absolute and relative effect sizes is recommended                                                       | 11-13; 21-23                                      |
| 38 |                                                      |     |                                                                                                                                                   |                                                   |
| 39 | Ancillary analyses                                   | 18  | Results of any other analyses performed, including subgroup analyses and adjusted analyses, distinguishing pre-specified from exploratory         | 11-13; 21-23                                      |
| 40 |                                                      |     |                                                                                                                                                   |                                                   |
| 41 |                                                      |     |                                                                                                                                                   |                                                   |
| 42 |                                                      |     |                                                                                                                                                   |                                                   |

|   |                          |    |                                                                                                                  |       |
|---|--------------------------|----|------------------------------------------------------------------------------------------------------------------|-------|
| 1 | Harms                    | 19 | All important harms or unintended effects in each group (for specific guidance see CONSORT for harms)            | n/a   |
| 2 | <b>Discussion</b>        |    |                                                                                                                  |       |
| 3 | Limitations              | 20 | Trial limitations, addressing sources of potential bias, imprecision, and, if relevant, multiplicity of analyses | 17    |
| 4 | Generalisability         | 21 | Generalisability (external validity, applicability) of the trial findings                                        | 14-17 |
| 5 | Interpretation           | 22 | Interpretation consistent with results, balancing benefits and harms, and considering other relevant evidence    | 13-17 |
| 6 | <b>Other information</b> |    |                                                                                                                  |       |
| 7 | Registration             | 23 | Registration number and name of trial registry                                                                   | 2     |
| 8 | Protocol                 | 24 | Where the full trial protocol can be accessed, if available                                                      | 6     |
| 9 | Funding                  | 25 | Sources of funding and other support (such as supply of drugs), role of funders                                  | 2     |

14 \*We strongly recommend reading this statement in conjunction with the CONSORT 2010 Explanation and Elaboration for important clarifications on all the items. If relevant, we also  
 15 recommend reading CONSORT extensions for cluster randomised trials, non-inferiority and equivalence trials, non-pharmacological treatments, herbal interventions, and pragmatic trials.  
 16 Additional extensions are forthcoming: for those and for up to date references relevant to this checklist, see [www.consort-statement.org](http://www.consort-statement.org).
