# Supplementary material for: How does a social norms-based intervention affect behaviour change? Interim findings from a cluster randomised controlled trial in Odisha, India
Source: PubMed Central journal article supplement (PMC9272109; doi:10.1136/bmjopen-2021-053152), 2022-07-08
Supplement: bmjopen-2021-053152supp001.pdf [file bmjopen-2021-053152supp001.pdf]

Appendix Table 1. Regression coefficients from models predicting midline hemoglobin as a function of treatment assignment, exposure to three intervention components, and control variables

|                                 | Model 1  | Model 2  | Model 3  | Model 4  | Model 5  |
|---------------------------------|----------|----------|----------|----------|----------|
| RANI Intervention Overall       | 0.12     | 0.14     | 0.11     | 0.10     | 0.07     |
| Group education sessions        |          |          |          |          |          |
| 1 (vs. 0)                       |          | 0.11     |          |          | 0.11     |
| 2 (vs. 0)                       |          | 0.19     |          |          | 0.17     |
| 3 (vs. 0)                       |          | 0.14     |          |          | 0.08     |
| 4 (vs. 0)                       |          | -0.04    |          |          | -0.11    |
| 5 (vs. 0)                       |          | -0.03    |          |          | -0.10    |
| 6 (vs. 0)                       |          | -0.12    |          |          | -0.19    |
| 7 (vs. 0)                       |          | -0.03    |          |          | -0.03    |
| 8 (vs. 0)                       |          | 0.08     |          |          | 0.06     |
| 9 (vs. 0)                       |          | -0.08    |          |          | -0.09    |
| 10 (vs. 0)                      |          | 0.04     |          |          | 0.03     |
| 11 (vs. 0)                      |          | -0.15    |          |          | -0.20    |
| Anemia testing                  |          |          |          |          |          |
| 1 (vs. 0)                       |          |          | 0.11     |          | 0.12     |
| 2 (vs. 0)                       |          |          | -0.13    |          | -0.14    |
| 3 (vs. 0)                       |          |          | -0.29    |          | -0.31    |
| 4+ (vs. 0)                      |          |          | -0.19    |          | -0.17    |
| RANI Comm videos                |          |          |          |          |          |
| 1 (vs. 0)                       |          |          |          | 0.18     | 0.18     |
| 2 (vs. 0)                       |          |          |          | -0.09    | -0.04    |
| 3 (vs. 0)                       |          |          |          | -0.02    | 0.08     |
| 4+ (vs. 0)                      |          |          |          | 0.05     | 0.20     |
| Control Variables               |          |          |          |          |          |
| Age                             | -0.00    | -0.00    | -0.00    | -0.00    | -0.00    |
| Education                       | 0.02     | 0.01     | 0.02*    | 0.02     | 0.02     |
| Breastfeeding                   | -0.16**  | -0.16*   | -0.16**  | -0.16**  | -0.16**  |
| Number of children              | -0.02    | -0.02    | -0.02    | -0.02    | -0.02    |
| Caste/Tribe                     | -0.39*** | -0.39*** | -0.39*** | -0.39*** | -0.39*** |
| Knows anemia status at baseline | -0.00    | -0.00    | -0.00    | -0.00    | -0.00    |
| Baseline IFA use                | -0.39**  | -0.40**  | -0.40**  | -0.39**  | -0.40**  |
| Non-RANI intervention exposure  | 0.15     | 0.13     | 0.15     | 0.15     | 0.12     |
| R2                              | 0.03     | 0.04     | 0.04     | 0.04     | 0.04     |
